# Supplementary material
Source: publisher site journal article supplement (https://www.dovepress.com/get_supplementary_file.php?f=258396.xlsx)
Supplement: Supplementary file 1 [file get_supplementary_file.php]

## Sheet: Suppl. Table 1
Supplementary table 1: Clinical covariates of the ICB cohort
Date of diagnosis	Age at diagnosis	Sex	Smoking history	Package per year	Histology	initial T stage	Initial N stage	Initial M stage	Brain metastasis	PD-L1 positivity	Radation therapy	Localisaton	Lines of chemotherapy beforehand	First line	First response	Second line	Third line	Fourth line	Number of pre-treatments	Substance	ECOG	Cycles	Response (RECIST)	Pseudoprogression	Ongoing remission	irAE	irAE events	Therapy of irAE events	Outcome irAE	Continuation of ICI	Therapy lines subsequent to ICI	Number of subsequent therapy lines	First regime subsequent to ICI	Second regime subsequent to ICI	Third regime subsequent to ICI	Vital status	time to death	time to progression	time to death (beginn of ICI)	Remisson	Progression
23·03·2012	69	female			squamous-cell carcinoma	T4	N2	M1b	no	no	yes	Thoracic wall	2	Carboplatin/Gemcitabine	SD	Docetaxel			3	Nivolumab	1	39	SD	no	yes	yes	Skin manifestations	Prednisolone	Persistence	no	no					Alive	2205	685	715	FALSE	FALSE
08·10·2014	61	female			adenocarcinoma	T4	N2	M1a	no	yes	no		3	Cisplatin/Pemetrexed	PR	Docetaxel	Tarceva		4	Nivolumab	1	4	PD	no	no	no					no					Diseased	682	64	131	FALSE	TRUE
15·10·2014	57	female			adenocarcinoma	T2a	N3	M1b	yes	yes	yes	Cerebral	1	Cisplatin/Pemetrexed	PR				2	Nivolumab	1	50	PR	no	yes	no					no					Alive	1274	655	713	TRUE	FALSE
04·11·2014	83	male			squamous-cell carcinoma	T3	N3	M0	no	no	yes	Mediastinum	1	Carboplatin, Gemcitabine + RAD	SD				2	Nivolumab	2	13	SD	no	no	no					yes	1	Gemcitabine	Afatinib		Diseased	1250	383	745	FALSE	FALSE
03·02·2015	54	male	ex		squamous-cell carcinoma	T2b	N2	M1a	no	no	no		1	Cisplatin/Gemcitabine	PR				2	Nivolumab	1	44	PR	no	no	no					no					Diseased	1076	629	844	TRUE	FALSE
27·02·2015	79	male			squamous-cell carcinoma	T2a	N2	M0	no	yes	yes	Mediastinum	1	Gemcitabine	SD				2	Nivolumab	1	34	SD	no	no	no					yes	1	Docetaxel			Diseased	1064	518	547	FALSE	FALSE
26·02·2015	59	male			squamous-cell carcinoma	T2b	N1	M0	no	no	no		2	Cisplatin/vindesine		Carboplatin/Gemcitabine			3	Nivolumab	1	8	PR	no	no	yes	Colitis III°, Pancreatitis II°	Prednisolone	Improvement	yes	no					Alive	1090	237	538	TRUE	FALSE
30·01·2015	66	male			squamous-cell carcinoma	Tx	N2	M0	no		yes	Mediastinum, HWS	1	Cisplatin/vindesine + RAD	SD				2	Nivolumab	1	26	SD	no	no	no					no					Alive	1027	370	544	FALSE	FALSE
18·03·2015	61	male			adenocarcinoma	T3	N2	M1b	no	yes	no		2	Cisplatin/Pemetrexed	PR	Docetaxel			3	Nivolumab	1	12	SD	no	no	yes	Cephalalgia/abducens nerve palsy II°	Dexamethasone	Improvement	no	no					Diseased	698	171	276	FALSE	FALSE
18·08·2015	58	male			adenocarcinoma	T3	N1	M1a	no	yes	yes	Lung	2	Cisplatin/Pemetrexed	PR	Docetaxel			3	Nivolumab	1	45	PR	no	yes	no					no					Diseased	944	668	689	TRUE	FALSE
19·05·2015	67	female			adenocarcinoma	T1a	N3	M1b	no	yes	yes	coxa	2	Cisplatin/Pemetrexed	PR	Docetaxel			3	Nivolumab	1	48	PR	no	no	no					yes	1	Carboplatin/Gemcitabine			Alive	1053	734	763	TRUE	FALSE
09·05·2012	64	male			adenocarcinoma	T3	N2	M1a	no	no	yes	Bones, LWS	3	Cisplatin/vindesine + Permetrexed-Erh	SD	Pemetrexed	Docetaxel		4	Nivolumab	2	3	SD	no	no	yes	Pneumonitis II°	Prednisolone	Persistence	no	no					Diseased	1625	89	125	FALSE	FALSE
09·06·2015	73	male	ex	40	squamous-cell carcinoma	T3	N2	M1a	no		no		1	Carboplatin/Gemcitabine	SD				2	Nivolumab	2	4	PD	no	no	no					no					Diseased	323	44	64	FALSE	TRUE
29·05·2015	66	male	ex		squamous-cell carcinoma	T2a	N0	M0	no	yes	yes	HWK 3-6	1	Gemcitabine					2	Nivolumab	2	3	PD	no	no	no					no					Diseased	313	31	85	FALSE	TRUE
19·06·2015	44	male	ex	10	squamous-cell carcinoma	T4	N2	M1b	no		no		1	Cisplatin/Gemcitabine	PR				2	Nivolumab	1	3	PD	no	no	no					yes	1	Tarceva			Diseased	230	37	57	FALSE	TRUE
09·07·2015	73	male			squamous-cell carcinoma	T4	N3	M1a	no	no	no		1	Carboplatin/Gemcitabine	PR				2	Nivolumab	1	4	PD	no	no	yes	Nephrotic syndrome III°		Improvement	no	yes	1	Docetaxel			Diseased	561	55	343	FALSE	TRUE
25·03·2015	52	male	ex	30	adenocarcinoma	T4	N1	M1b	no	yes	no		3	Cisplatin/Pemetrexed	PD	Docetaxel/Nintedanib	Gemcitabine		4	Nivolumab	2	8	PR	no	no	no					yes	3	Vinorelbine	Tarceva	Nivolumab	Diseased	559	111	403	TRUE	FALSE
28·08·2015	70	male			squamous-cell carcinoma	T1a	N2	M1a	no	no	no		1	Carboplatin/Gemcitabine	SD				2	Nivolumab	1	1	PD	no	no	yes	Pneumonitis III°	Prednisolone	Improvement	no	yes	1	Erlotinib			Diseased	273	67	141	FALSE	TRUE
14·03·2012	68	male			adenocarcinoma	T1b	N0	M0	no	yes	yes	Lung	2	Carboplatin/vindesine	PD	Pemetrexed			3	Nivolumab	2	6	PD	no	no	no					no					Diseased	1647	417	144	FALSE	TRUE
19·10·2015	61	female			adenocarcinoma	T1a	N1	M0	yes	yes	yes	Cerebral, LWS	1	Cisplatin/vindesine adj·					2	Nivolumab	1	4	PD	no	no	no					yes	2	Docetaxel/Ramucirumab	Erlotinib		Diseased	610	57	322	FALSE	TRUE
23·11·2015	63	female			squamous-cell carcinoma	T4	N3	M1a	no	yes	yes	Lung	1	Carboplatin/vindesine	SD				2	Nivolumab	1	16	SD	no	yes	yes	Dermatitis I°, Hepatitis II°	Prednisolone	Improvement	no	no					Diseased	454	227	362	FALSE	FALSE
26·11·2015	51	male			squamous-cell carcinoma	T4	N2	M1b	no	no	yes	Bones, coxa, LWS	1	Cisplatin/vindesine	PR				2	Nivolumab	1	2	PD	no	no	no					no					Diseased	276	27	82	FALSE	TRUE
18·10·2013	72	male	ex		squamous-cell carcinoma	T3	N2	M1a	no	no	no		3	Carbo/Gemcitabine	PR	Docetaxel	Vindesine		4	Nivolumab	1	67	PR	no	yes	no					no					Alive	1629	930	945	TRUE	FALSE
09·11·2012	73	male	ex	20	adenocarcinoma	T4	N2	M0	no	yes	no		3	Carboplatin/vindesine	PR	Carboplatin/vindesine	Pemetrexed		4	Nivolumab	2	5	PD	no	no	no					yes	1	Docetaxel			Diseased	1301	88	133	FALSE	TRUE
07·12·2015	74	female			squamous-cell carcinoma	T4	N2	M0	no	no	yes	Mediastinum	1	Carboplatin/vindesine + RAD	PR				2	Nivolumab	2	11	SD	no	no	no					no					Diseased	396	119	155	FALSE	FALSE
24·06·2014	63	female			adenocarcinoma	T4	N2	M1a	no	yes	no		5	Cisplatin/Pemetrexed	PR	Docetaxel	Vindesine	Gemcitabine	6	Nivolumab	1	4	PD	no	no	no					no					Diseased	823	54	162	FALSE	TRUE
25·08·2015	59	female			adenocarcinoma	T3	N2	M1b	yes	yes	yes	Cerebral, LWS	1	Cisplatin/Pemetrexed	PR				2	Nivolumab	2	10	SD	no	yes	no					no					Diseased	513	116	178	FALSE	FALSE
23·06·2015	59	male	ex	90	adenocarcinoma	T4	N2	M0	no	yes	yes	Mediastinum	1	Cisplatin/vindesine + Rad	SD				2	Nivolumab	2	2	PD	no	no	no					no					Diseased	358	36	119	FALSE	TRUE
11·01·2016	78	male			adenocarcinoma	T1a	N3	M1b	no	yes	no		1	Carboplatin/vindesine	PR				2	Nivolumab	1	42	PR	no	yes	yes	Hepatits II°		Improvement	yes	no					Alive	814	627	628	TRUE	FALSE
26·08·2010	53	male			adenocarcinoma	T4	N1	M1a	no	yes	no		6	Carboplatin/vindesine	PR	Carboplatin /Gemcitabine	Pemetrexed		7	Nivolumab	1	4	PD	no	no	no					yes	2	Pemetrexed	Docetaxel/Ramucirumab		Diseased	2361	55	318	FALSE	TRUE
03·02·2016	64	male			adenocarcinoma	T4	N3	M0	no	yes	yes	Mediastinum	1	Cisplatin/vindesine + Rad	SD				2	Nivolumab	1	37	PR	no	yes	no					no					Alive	797	566	595	TRUE	FALSE
20·06·2012	69	male			adenocarcinoma	T1a	N0	M0	no	yes	yes	LWK3	1	Carboplatin/vindesine	SD				2	Nivolumab	1	10	PR	no	no	yes	Hypothyroidism I°	Substitution	Improvement	yes	yes	1	Pemetrexed			Diseased	1911	160	384	TRUE	FALSE
11·02·2016	73	female			adenocarcinoma	T4	N2	M1b	no	yes	no		1	Carboplatin/vindesine	PD				2	Nivolumab	1	14	PR	yes	no	yes	Hepatitis III°	Prednisolone	Improvement	yes	yes	2	Pemetrexed	Erlotinib		Diseased	496	245	400	TRUE	FALSE
16·01·2014	59	male	aktiv	60	squamous-cell carcinoma	T3	N3	M1a	no		no		2	Cisplatin/Gemcitabine	PR	Carboplatin /Gemcitabine			3	Nivolumab	1	49	PR	no	yes	yes	Rheumatoid arthritis II°	Prednisolone	Persistence	no	no					Alive	1538	851	904	TRUE	FALSE
29·02·2016	53	male			adenocarcinoma	T4	N3	M1b	no	yes	no		1	Cisplatin/Pemetrexed+Pemetrexed	SD				2	Nivolumab	1	43	PR	no	yes	no					no					Alive	772	538	608	TRUE	FALSE
15·04·2014	69	male	ex	30	squamous-cell carcinoma	T3	N2	M0	no		yes	Mediastinum	1	Carboplatin/vindesine + RAD	SD				2	Nivolumab	1	8	SD	no	no	no					yes	1	Docetaxel			Diseased	1102	113	521	FALSE	FALSE
15·03·2016	51	male			squamous-cell carcinoma	T4	N2	M0	no	yes	no		1	Cisplatin/Gemcitabine	SD				2	Nivolumab	1	1	PD	no	no	no					no					Diseased	64	36	86	FALSE	TRUE
12·04·2016	53	male			adenocarcinoma	T4	N3	M1b	no	yes	yes	Lung	1	Carbo/Pemetrexed	PD				2	Nivolumab	1	43	PR	no	yes	yes	Pneumonitis I°, Hypothyroidism	watch + wait	Improvement	yes	no					Alive	730	588	631	TRUE	FALSE
19·09·2014	62	female			adenocarcinoma	T2a	N3	M0	no	yes	yes	Mediastinum	2	Cisplatin + RAD	PR	Carboplatin /Gemcitabine			3	Nivolumab	1	20	PR	no	no	yes	Dermatitis I°, Arthralgia II°, Hypothyroidism	Prednisolone	Improvement	no	yes	1	Pemetrexed			Alive	1295	679	695	TRUE	FALSE
27·04·2016	65	female			adenocarcinoma	T2b	N1	M1a	no	yes	no		1	Cisplatin/Pemetrexed	PD				2	Nivolumab	1	4	PD	no	no	no					yes	2	Erlotinib	Docetaxel/Ramucirumab		Diseased	296	57	206	FALSE	TRUE
15·07·2014	61	female			squamous-cell carcinoma	T2a	N3	M0	no	yes	yes	Mediastinum	1	Cisplatin/vindesine	PR				2	Nivolumab	1	4	PD	no	no	no					no					Diseased	870	68	134	FALSE	TRUE
08·09·2015	54	female	ex	5	squamous-cell carcinoma	T3	N2	M1b	yes		yes	Cerebral	1	Cisplatin bzw Carbo/Vino	PR				2	Nivolumab	0	18	SD	no	yes	yes	Dermatitis III°	Prednisolone	Improvement	yes	no					Diseased	514	354	365	FALSE	FALSE
08·12·2014	82	male			squamous-cell carcinoma	T3	N3	M0	no	yes	yes	Mediastinum	1	Carbo/Gemcitabine + Rad	PR				2	Nivolumab	2	20	PR	no	no	no					no					Alive	1087	305	559	TRUE	FALSE
24·04·2014	77	male	ex	60	squamous-cell carcinoma	T4	N2	M1a	no	no	yes	Hilum pulmonis	1	Carbo/Gemcitabine	PD				2	Nivolumab	2	5	PD	no	no	no					no					Diseased	650	75	90	FALSE	TRUE
27·01·2012	64	male	ex		squamous-cell carcinoma	T3	N3	M0	no	no	yes	Mediastinum	3	Cisplatin/vindesine + RAD	PR	Carboplatin /Gemcitabine	Docetaxel		4	Nivolumab	2	49	PR	no	yes	yes	Polyneuropathy I°, skin manifestations	ICI stopped	Improvement	no	no					Alive	2260	953	953	TRUE	FALSE
22·07·2014	83	female			squamous-cell carcinoma	T3	N0	M1a	no	no	no		2	Gemcitabine	SD	vindesine			3	Nivolumab	2	4	PD	no	no	no					no					Diseased	822	57	74	FALSE	TRUE
19·06·2014	64	female	aktiv		squamous-cell carcinoma	T4	N2	M0	no	yes	yes	Mediastinum	2	Cisplatin/vindesine adj·		Docetaxel			3	Nivolumab	1	19	PR	no	no	yes	Dermatitis I°	dermocorticoids	Improvement	yes	no					Diseased	1102	293	577	TRUE	FALSE
17·09·2014	70	male			adenocarcinoma	T4	N0	M1a	yes	yes	yes	Cerebral	2	Carboplatin/vindesine	SD	Pemetrexed			3	Nivolumab	1	1	PD	no	no	no					no					Diseased	588	34	42	FALSE	TRUE

## Sheet: Suppl. Table 2
Supplementary table 2: Result of the epitope database research. "Gene_HUGO" describes the affected gene and "AA_change" the changes on protein level by non-synonymous mutation. "Epitope-Sequence" displays the consensus sequence of the affected epitope by mutation as well as the amino acid position of the first epitope position "epitope_start". All consensus epitope sequences span nine amino acids…
Gene_HUGO	HLA_type	AA_change	epitope_start	IC50	Epitope_Sequence
TP53	HLA-A-01:01	C242F	226	56.9603	GSDCTTIHY
DDR2	HLA-A-02:01	L94F	86	23.7964	FLQIDLHTL
FBXW7	HLA-A-02:01	R505G	496	5.82072	VLMGHVAAV
FGFR2	HLA-A-02:01	V395A	386	38.3618	FLIACMVVT
FGFR2	HLA-A-02:01	V395A	387	68.3854	LIACMVVTV
FGFR3	HLA-A-02:01	F384L	384	11.9655	FLFILVVAA
KRAS	HLA-A-02:01	Q61H	51	59.9933	CLLDILDTA
KRAS	HLA-A-02:01	D47V	51	59.9933	CLLDILDTA
KRAS	HLA-A-02:01	R41S	28	35.5977	FVDEYDPTI
SMAD4	HLA-A-02:01	A406V	401	25.2702	CLSDHAVFV
TP53	HLA-A-02:01	R280T	264	42.8022	LLGRNSFEV
TP53	HLA-A-02:01	P278L	264	42.8022	LLGRNSFEV
TP53	HLA-A-02:01	V274F	264	42.8022	LLGRNSFEV
TP53	HLA-A-02:01	R273L	264	42.8022	LLGRNSFEV
TP53	HLA-A-02:01	Q104*	103	89.3553	YQGSYGFRL
TP53	HLA-A-02:01	S99F	103	89.3553	YQGSYGFRL
TP53	HLA-A-02:01	E68K	65	27.8945	RMPEAAPPV
AKT1	HLA-A-02:02	W22C	11	81.246	WLHKRGEYI
AKT1	HLA-A-02:02	E17L	11	81.246	WLHKRGEYI
DDR2	HLA-A-02:02	L94F	86	15.1854	FLQIDLHTL
EGFR	HLA-A-02:02	V769A	764	95.1085	YVMASVDNP
ERBB4	HLA-A-02:02	P594L	596	75.1898	GLQGANSFI
FBXW7	HLA-A-02:02	R505G	496	4.87389	VLMGHVAAV
FGFR2	HLA-A-02:02	V395A	379	40.002	AIYCIGVFL
FGFR2	HLA-A-02:02	V395A	386	35.8428	FLIACMVVT
FGFR2	HLA-A-02:02	V395A	387	45.2455	LIACMVVTV
FGFR2	HLA-A-02:02	A362A	349	93.9083	GISFHSAWL
FGFR2	HLA-A-02:02	A362A	352	51.3198	FHSAWLTVL
FGFR2	HLA-A-02:02	S299N	301	94.4832	YGPDGLPYL
FGFR3	HLA-A-02:02	R252W	258	49.8455	GLPANQTAV
FGFR3	HLA-A-02:02	G370S	356	28.0795	VLPAEEELV
FGFR3	HLA-A-02:02	G370S	376	80.4509	ILSYGVGFF
FGFR3	HLA-A-02:02	S371N	356	28.0795	VLPAEEELV
FGFR3	HLA-A-02:02	S371N	376	80.4509	ILSYGVGFF
FGFR3	HLA-A-02:02	S371N	379	90.2745	YGVGFFLFI
FGFR3	HLA-A-02:02	F384L	376	80.4509	ILSYGVGFF
FGFR3	HLA-A-02:02	F384L	379	90.2745	YGVGFFLFI
FGFR3	HLA-A-02:02	F384L	384	5.89529	FLFILVVAA
FGFR3	HLA-A-02:02	F384L	387	95.5898	ILVVAAVTL
MET	HLA-A-02:02	N375S	369	45.1419	YVNDFFNKI
MET	HLA-A-02:02	V1237I	1244	98.2298	KLPVKWMAL
PIK3CA	HLA-A-02:02	E545K	550	82.7421	FLWSHRHYC
PIK3CA	HLA-A-02:02	M697T	698	87.0601	YLKHLNRQV
PIK3CA	HLA-A-02:02	E707K	698	87.0601	YLKHLNRQV
PIK3CA	HLA-A-02:02	E707K	711	32.6814	KLINLTDIL
PTEN	HLA-A-02:02	P404L	411	38.0208	FMYFEFPQP
SMAD4	HLA-A-02:02	P186L	171	56.8037	SLSTEGHSI
SMAD4	HLA-A-02:02	A202T	200	58.0563	LLAPSESNA
SMAD4	HLA-A-02:02	A406V	401	5.4727	CLSDHAVFV
SMAD4	HLA-A-02:02	A406V	406	32.9165	AVFVQSYYL
STK11	HLA-A-02:02	G52R	49	19.2119	YLMGDLLGE
STK11	HLA-A-02:02	L282R	285	89.1338	LLKGMLEYE
STK11	HLA-A-02:02	D284F	285	89.1338	LLKGMLEYE
TP53	HLA-A-02:02	R280T	264	35.5268	LLGRNSFEV
TP53	HLA-A-02:02	P278L	264	35.5268	LLGRNSFEV
TP53	HLA-A-02:02	V274F	264	35.5268	LLGRNSFEV
TP53	HLA-A-02:02	R273L	264	35.5268	LLGRNSFEV
TP53	HLA-A-02:02	H193R	187	33.0151	GLAPPQHLI
TP53	HLA-A-02:02	H168R	164	66.5831	KQSQHMTEV
TP53	HLA-A-02:02	Q165*	164	66.5831	KQSQHMTEV
TP53	HLA-A-02:02	R158L	164	66.5831	KQSQHMTEV
TP53	HLA-A-02:02	V157F	164	66.5831	KQSQHMTEV
TP53	HLA-A-02:02	Q104*	103	84.2868	YQGSYGFRL
TP53	HLA-A-02:02	S99F	103	84.2868	YQGSYGFRL
NOTCH1	HLA-A-02:02	L1600R	1592	52.7987	FLRELSRVL
AKT1	HLA-A-02:03	W22C	28	44.0354	LLKNDGTFI
DDR2	HLA-A-02:03	L94F	86	23.6191	FLQIDLHTL
DDR2	HLA-A-02:03	W771*	759	48.3979	ILLGKFTTA
FBXW7	HLA-A-02:03	R505G	493	21.1614	CLHVLMGHV
FBXW7	HLA-A-02:03	R505G	496	0.754179	VLMGHVAAV
FBXW7	HLA-A-02:03	V485I	493	21.1614	CLHVLMGHV
FGFR2	HLA-A-02:03	V395A	386	40.6813	FLIACMVVT
FGFR2	HLA-A-02:03	V395A	387	14.6936	LIACMVVTV
FGFR2	HLA-A-02:03	A362A	349	81.7091	GISFHSAWL
FGFR2	HLA-A-02:03	E275K	261	19.1527	GLPANASTV
FGFR2	HLA-A-02:03	A266T	261	19.1527	GLPANASTV
FGFR3	HLA-A-02:03	R252W	258	21.006	GLPANQTAV
FGFR3	HLA-A-02:03	F384L	384	6.49754	FLFILVVAA
FGFR3	HLA-A-02:03	S787F	789	67.1842	FAHDLLPPA
FGFR3	HLA-A-02:03	A790T	789	67.1842	FAHDLLPPA
KRAS	HLA-A-02:03	Q61H	51	58.6499	CLLDILDTA
KRAS	HLA-A-02:03	D47V	51	58.6499	CLLDILDTA
MET	HLA-A-02:03	N375S	369	50.1789	YVNDFFNKI
PIK3CA	HLA-A-02:03	M697T	686	82.5449	LLLESYCRA
PIK3CA	HLA-A-02:03	M697T	698	25.7633	YLKHLNRQV
PIK3CA	HLA-A-02:03	E707K	698	25.7633	YLKHLNRQV
PTEN	HLA-A-02:03	S168N	170	33.2981	RLPDMTAII
PTEN	HLA-A-02:03	M174V	170	33.2981	RLPDMTAII
PTEN	HLA-A-02:03	P404L	411	45.2498	FMYFEFPQP
SMAD4	HLA-A-02:03	P186L	171	65.8427	SLSTEGHSI
SMAD4	HLA-A-02:03	A202T	200	40.9744	LLAPSESNA
SMAD4	HLA-A-02:03	A406V	401	5.28169	CLSDHAVFV
TP53	HLA-A-02:03	R280T	264	94.4436	LLGRNSFEV
TP53	HLA-A-02:03	P278L	264	94.4436	LLGRNSFEV
TP53	HLA-A-02:03	V274F	264	94.4436	LLGRNSFEV
TP53	HLA-A-02:03	R273L	264	94.4436	LLGRNSFEV
TP53	HLA-A-02:03	H168R	164	27.675	KQSQHMTEV
TP53	HLA-A-02:03	Q165*	164	27.675	KQSQHMTEV
TP53	HLA-A-02:03	R158L	164	27.675	KQSQHMTEV
TP53	HLA-A-02:03	V157F	164	27.675	KQSQHMTEV
TP53	HLA-A-02:03	E68K	65	14.319	RMPEAAPPV
NOTCH1	HLA-A-02:03	L1600R	1592	53.686	FLRELSRVL
DDR2	HLA-A-02:06	L94F	86	66.485	FLQIDLHTL
DDR2	HLA-A-02:06	L94F	92	55.8062	HTLHFITLV
DDR2	HLA-A-02:06	W771*	759	51.1902	ILLGKFTTA
DDR2	HLA-A-02:06	W771*	767	51.4851	ASDVWAFGV
EGFR	HLA-A-02:06	T710I	718	92.3461	LGSGAFGTV
FBXW7	HLA-A-02:06	R505G	496	11.546	VLMGHVAAV
FBXW7	HLA-A-02:06	R505G	507	68.5633	VQYDGRRVV
FGFR2	HLA-A-02:06	V395A	386	43.1975	FLIACMVVT
FGFR2	HLA-A-02:06	V395A	387	58.3437	LIACMVVTV
FGFR2	HLA-A-02:06	S299N	301	10.5232	YGPDGLPYL
FGFR3	HLA-A-02:06	R252W	238	92.7773	RQTYTLDVL
FGFR3	HLA-A-02:06	G370S	377	97.4887	LSYGVGFFL
FGFR3	HLA-A-02:06	S371N	377	97.4887	LSYGVGFFL
FGFR3	HLA-A-02:06	S371N	379	10.1966	YGVGFFLFI
FGFR3	HLA-A-02:06	F384L	377	97.4887	LSYGVGFFL
FGFR3	HLA-A-02:06	F384L	379	10.1966	YGVGFFLFI
FGFR3	HLA-A-02:06	F384L	381	39.3009	VGFFLFILV
FGFR3	HLA-A-02:06	F384L	384	37.0059	FLFILVVAA
FGFR3	HLA-A-02:06	S787F	789	18.9156	FAHDLLPPA
FGFR3	HLA-A-02:06	A790T	789	18.9156	FAHDLLPPA
KRAS	HLA-A-02:06	Q61H	51	73.4937	CLLDILDTA
KRAS	HLA-A-02:06	D47V	51	73.4937	CLLDILDTA
KRAS	HLA-A-02:06	R41S	28	10.2623	FVDEYDPTI
KRAS	HLA-A-02:06	G12V	6	94.1392	LVVVGAGGV
KRAS	HLA-A-02:06	G12C	6	94.1392	LVVVGAGGV
MET	HLA-A-02:06	N375S	369	20.8372	YVNDFFNKI
PIK3CA	HLA-A-02:06	M697T	704	13.1016	RQVEAMEKL
PIK3CA	HLA-A-02:06	E707K	704	13.1016	RQVEAMEKL
PTEN	HLA-A-02:06	P404L	411	30.4777	FMYFEFPQP
SMAD4	HLA-A-02:06	P312L	310	20.0948	FQPPISNHP
SMAD4	HLA-A-02:06	A327V	333	5.7146	VQVGETFKV
SMAD4	HLA-A-02:06	A406V	401	21.9647	CLSDHAVFV
STK11	HLA-A-02:06	G52R	49	34.585	YLMGDLLGE
STK11	HLA-A-02:06	P326S	333	81.0442	RSMTVVPYL
TP53	HLA-A-02:06	H168R	164	6.31172	KQSQHMTEV
TP53	HLA-A-02:06	Q165*	164	6.31172	KQSQHMTEV
TP53	HLA-A-02:06	R158L	164	6.31172	KQSQHMTEV
TP53	HLA-A-02:06	V157F	164	6.31172	KQSQHMTEV
TP53	HLA-A-02:06	Q104*	103	27.39	YQGSYGFRL
TP53	HLA-A-02:06	S99F	103	27.39	YQGSYGFRL
TP53	HLA-A-02:06	E68K	65	5.68502	RMPEAAPPV
AKT1	HLA-A-02:11	W22C	11	18.4493	WLHKRGEYI
AKT1	HLA-A-02:11	E17L	11	18.4493	WLHKRGEYI
BRAF	HLA-A-02:11	K601E	592	79.5628	IGDFGLATV
BRAF	HLA-A-02:11	V590I	592	79.5628	IGDFGLATV
BRAF	HLA-A-02:11	G466A	451	73.1169	EIPDGQITV
DDR2	HLA-A-02:11	L94F	86	1.38531	FLQIDLHTL
DDR2	HLA-A-02:11	W771*	759	16.7671	ILLGKFTTA
DDR2	HLA-A-02:11	W771*	767	82.7493	ASDVWAFGV
DDR2	HLA-A-02:11	W771*	776	91.7226	TLWETFTFC
EGFR	HLA-A-02:11	T710I	717	21.6737	VLGSGAFGT
EGFR	HLA-A-02:11	V769A	758	69.7772	EILDEAYVM
EGFR	HLA-A-02:11	V769A	759	2.25388	ILDEAYVMA
ERBB4	HLA-A-02:11	P594L	596	30.0793	GLQGANSFI
FBXW7	HLA-A-02:11	R505G	493	45.585	CLHVLMGHV
FBXW7	HLA-A-02:11	R505G	496	0.346741	VLMGHVAAV
FBXW7	HLA-A-02:11	R505G	507	49.9627	VQYDGRRVV
FBXW7	HLA-A-02:11	V485I	493	45.585	CLHVLMGHV
FGFR2	HLA-A-02:11	V395A	379	18.4324	AIYCIGVFL
FGFR2	HLA-A-02:11	V395A	384	10.3634	GVFLIACMV
FGFR2	HLA-A-02:11	V395A	386	47.4229	FLIACMVVT
FGFR2	HLA-A-02:11	V395A	387	5.17812	LIACMVVTV
FGFR2	HLA-A-02:11	S299N	301	62.5409	YGPDGLPYL
FGFR2	HLA-A-02:11	E275K	261	3.93378	GLPANASTV
FGFR2	HLA-A-02:11	E275K	269	10.0322	VVGGDVEFV
FGFR2	HLA-A-02:11	A266T	257	23.4011	ILQAGLPAN
FGFR2	HLA-A-02:11	A266T	261	3.93378	GLPANASTV
FGFR2	HLA-A-02:11	A266T	269	10.0322	VVGGDVEFV
FGFR3	HLA-A-02:11	R252W	254	23.4011	ILQAGLPAN
FGFR3	HLA-A-02:11	R252W	258	11.5006	GLPANQTAV
FGFR3	HLA-A-02:11	G370S	356	18.1323	VLPAEEELV
FGFR3	HLA-A-02:11	G370S	373	62.8964	YAGILSYGV
FGFR3	HLA-A-02:11	S371N	356	18.1323	VLPAEEELV
FGFR3	HLA-A-02:11	S371N	373	62.8964	YAGILSYGV
FGFR3	HLA-A-02:11	F384L	373	62.8964	YAGILSYGV
FGFR3	HLA-A-02:11	F384L	384	1.1128	FLFILVVAA
FGFR3	HLA-A-02:11	F384L	385	48.2222	LFILVVAAV
FGFR3	HLA-A-02:11	F384L	386	74.9599	FILVVAAVT
FGFR3	HLA-A-02:11	F384L	387	15.8672	ILVVAAVTL
KRAS	HLA-A-02:11	K117N	112	33.1155	VLVGNKCDL
KRAS	HLA-A-02:11	Q61H	45	71.1009	VIDGETCLL
KRAS	HLA-A-02:11	Q61H	51	3.3262	CLLDILDTA
KRAS	HLA-A-02:11	D47V	45	71.1009	VIDGETCLL
KRAS	HLA-A-02:11	D47V	51	3.3262	CLLDILDTA
KRAS	HLA-A-02:11	R41S	28	14.1063	FVDEYDPTI
KRAS	HLA-A-02:11	R41S	45	71.1009	VIDGETCLL
MAP2K1	HLA-A-02:11	D67Y	73	61.0689	ELGAGNGGV
MET	HLA-A-02:11	N375S	369	58.0602	YVNDFFNKI
MET	HLA-A-02:11	V1237I	1228	39.8974	DMYDKEYYS
MET	HLA-A-02:11	V1237I	1244	47.2948	KLPVKWMAL
PIK3CA	HLA-A-02:11	E545K	550	18.4161	FLWSHRHYC
PIK3CA	HLA-A-02:11	M697T	686	1.99262	LLLESYCRA
PIK3CA	HLA-A-02:11	M697T	698	57.2277	YLKHLNRQV
PIK3CA	HLA-A-02:11	M697T	701	87.3316	HLNRQVEAM
PIK3CA	HLA-A-02:11	E707K	698	57.2277	YLKHLNRQV
PIK3CA	HLA-A-02:11	E707K	701	87.3316	HLNRQVEAM
PTEN	HLA-A-02:11	S168N	170	70.2209	RLPDMTAII
PTEN	HLA-A-02:11	M174V	170	70.2209	RLPDMTAII
PTEN	HLA-A-02:11	P404L	411	75.1038	FMYFEFPQP
SMAD4	HLA-A-02:11	A202T	199	73.8692	ALLAPSESN
SMAD4	HLA-A-02:11	A327V	333	51.1694	VQVGETFKV
SMAD4	HLA-A-02:11	A406V	401	3.7177	CLSDHAVFV
SMAD4	HLA-A-02:11	A406V	406	62.8888	AVFVQSYYL
SMAD4	HLA-A-02:11	A406V	413	53.7753	YLDREAGRA
STK11	HLA-A-02:11	G270E	262	13.3525	KLFENIGKG
STK11	HLA-A-02:11	G270E	266	71.1272	NIGKGSYAI
STK11	HLA-A-02:11	L282R	266	71.1272	NIGKGSYAI
STK11	HLA-A-02:11	P326S	333	99.1819	RSMTVVPYL
TP53	HLA-A-02:11	R333C	322	39.0854	PLDGEYFTL
TP53	HLA-A-02:11	R280T	264	4.03257	LLGRNSFEV
TP53	HLA-A-02:11	P278L	264	4.03257	LLGRNSFEV
TP53	HLA-A-02:11	V274F	264	4.03257	LLGRNSFEV
TP53	HLA-A-02:11	R273L	264	4.03257	LLGRNSFEV
TP53	HLA-A-02:11	L252P	236	10.8916	YMCNSSCMG
TP53	HLA-A-02:11	R249M	236	10.8916	YMCNSSCMG
TP53	HLA-A-02:11	G245V	236	10.8916	YMCNSSCMG
TP53	HLA-A-02:11	C242F	236	10.8916	YMCNSSCMG
TP53	HLA-A-02:11	H193R	187	55.8505	GLAPPQHLI
TP53	HLA-A-02:11	Q104*	103	27.5116	YQGSYGFRL
TP53	HLA-A-02:11	Q104*	110	74.9195	RLGFLHSGT
TP53	HLA-A-02:11	S99F	103	27.5116	YQGSYGFRL
TP53	HLA-A-02:11	E68K	65	0.39793	RMPEAAPPV
NOTCH1	HLA-A-02:11	L1600R	1592	34.2431	FLRELSRVL
DDR2	HLA-A-02:12	L94F	86	3.0745	FLQIDLHTL
DDR2	HLA-A-02:12	W771*	759	99.2238	ILLGKFTTA
EGFR	HLA-A-02:12	V769A	759	30.8082	ILDEAYVMA
ERBB4	HLA-A-02:12	P594L	596	29.6594	GLQGANSFI
FBXW7	HLA-A-02:12	R505G	496	3.20235	VLMGHVAAV
FGFR2	HLA-A-02:12	V395A	386	62.0258	FLIACMVVT
FGFR2	HLA-A-02:12	V395A	387	23.5169	LIACMVVTV
FGFR2	HLA-A-02:12	E275K	261	10.1385	GLPANASTV
FGFR2	HLA-A-02:12	A266T	261	10.1385	GLPANASTV
FGFR3	HLA-A-02:12	R252W	258	26.5753	GLPANQTAV
FGFR3	HLA-A-02:12	F384L	384	14.292	FLFILVVAA
FGFR3	HLA-A-02:12	F384L	387	21.0414	ILVVAAVTL
KRAS	HLA-A-02:12	K117N	112	84.5938	VLVGNKCDL
KRAS	HLA-A-02:12	Q61H	51	21.7235	CLLDILDTA
KRAS	HLA-A-02:12	D47V	51	21.7235	CLLDILDTA
KRAS	HLA-A-02:12	R41S	28	30.4875	FVDEYDPTI
PIK3CA	HLA-A-02:12	M697T	686	14.8977	LLLESYCRA
PIK3CA	HLA-A-02:12	M697T	698	89.3735	YLKHLNRQV
PIK3CA	HLA-A-02:12	E707K	698	89.3735	YLKHLNRQV
PIK3CA	HLA-A-02:12	E707K	711	24.6186	KLINLTDIL
PTEN	HLA-A-02:12	S168N	170	86.1432	RLPDMTAII
PTEN	HLA-A-02:12	M174V	170	86.1432	RLPDMTAII
SMAD4	HLA-A-02:12	P186L	171	76.6275	SLSTEGHSI
SMAD4	HLA-A-02:12	A406V	401	8.01551	CLSDHAVFV
TP53	HLA-A-02:12	R280T	264	4.06504	LLGRNSFEV
TP53	HLA-A-02:12	P278L	264	4.06504	LLGRNSFEV
TP53	HLA-A-02:12	V274F	264	4.06504	LLGRNSFEV
TP53	HLA-A-02:12	R273L	264	4.06504	LLGRNSFEV
TP53	HLA-A-02:12	H193R	187	65.7191	GLAPPQHLI
TP53	HLA-A-02:12	E68K	65	1.50653	RMPEAAPPV
NOTCH1	HLA-A-02:12	L1600R	1592	77.4018	FLRELSRVL
DDR2	HLA-A-02:16	L94F	86	9.26939	FLQIDLHTL
DDR2	HLA-A-02:16	W771*	759	33.2863	ILLGKFTTA
EGFR	HLA-A-02:16	T710I	717	39.497	VLGSGAFGT
EGFR	HLA-A-02:16	V769A	759	5.68864	ILDEAYVMA
ERBB4	HLA-A-02:16	P594L	596	38.3137	GLQGANSFI
FBXW7	HLA-A-02:16	R505G	496	34.6845	VLMGHVAAV
FGFR2	HLA-A-02:16	V395A	384	47.1334	GVFLIACMV
FGFR2	HLA-A-02:16	V395A	386	96.6907	FLIACMVVT
FGFR2	HLA-A-02:16	V395A	387	35.4435	LIACMVVTV
FGFR2	HLA-A-02:16	S299N	301	24.9897	YGPDGLPYL
FGFR2	HLA-A-02:16	E275K	261	15.3639	GLPANASTV
FGFR2	HLA-A-02:16	E275K	269	97.6324	VVGGDVEFV
FGFR2	HLA-A-02:16	A266T	261	15.3639	GLPANASTV
FGFR2	HLA-A-02:16	A266T	269	97.6324	VVGGDVEFV
FGFR3	HLA-A-02:16	R252W	258	28.0707	GLPANQTAV
FGFR3	HLA-A-02:16	G370S	356	23.6663	VLPAEEELV
FGFR3	HLA-A-02:16	S371N	356	23.6663	VLPAEEELV
FGFR3	HLA-A-02:16	F384L	384	4.32116	FLFILVVAA
KRAS	HLA-A-02:16	Q61H	51	8.82473	CLLDILDTA
KRAS	HLA-A-02:16	D47V	51	8.82473	CLLDILDTA
KRAS	HLA-A-02:16	R41S	28	11.8143	FVDEYDPTI
MET	HLA-A-02:16	V1237I	1228	98.4649	DMYDKEYYS
PIK3CA	HLA-A-02:16	M697T	686	3.76802	LLLESYCRA
PIK3CA	HLA-A-02:16	E707K	711	91.8265	KLINLTDIL
PTEN	HLA-A-02:16	P404L	411	13.3987	FMYFEFPQP
SMAD4	HLA-A-02:16	A202T	200	43.3517	LLAPSESNA
SMAD4	HLA-A-02:16	A406V	401	18.6376	CLSDHAVFV
TP53	HLA-A-02:16	R333C	322	73.3468	PLDGEYFTL
TP53	HLA-A-02:16	R280T	264	13.1663	LLGRNSFEV
TP53	HLA-A-02:16	P278L	264	13.1663	LLGRNSFEV
TP53	HLA-A-02:16	V274F	264	13.1663	LLGRNSFEV
TP53	HLA-A-02:16	R273L	264	13.1663	LLGRNSFEV
TP53	HLA-A-02:16	L252P	236	48.2173	YMCNSSCMG
TP53	HLA-A-02:16	R249M	236	48.2173	YMCNSSCMG
TP53	HLA-A-02:16	G245V	236	48.2173	YMCNSSCMG
TP53	HLA-A-02:16	C242F	236	48.2173	YMCNSSCMG
TP53	HLA-A-02:16	H193R	187	67.5025	GLAPPQHLI
TP53	HLA-A-02:16	Q104*	103	76.9131	YQGSYGFRL
TP53	HLA-A-02:16	S99F	103	76.9131	YQGSYGFRL
TP53	HLA-A-02:16	E68K	65	0.555137	RMPEAAPPV
DDR2	HLA-A-02:19	L94F	86	26.0845	FLQIDLHTL
EGFR	HLA-A-02:19	T710I	717	77.1122	VLGSGAFGT
EGFR	HLA-A-02:19	V769A	759	52.3701	ILDEAYVMA
FBXW7	HLA-A-02:19	R505G	496	1.01298	VLMGHVAAV
FGFR2	HLA-A-02:19	V395A	387	59.3345	LIACMVVTV
FGFR2	HLA-A-02:19	E275K	269	61.7985	VVGGDVEFV
FGFR2	HLA-A-02:19	A266T	269	61.7985	VVGGDVEFV
FGFR3	HLA-A-02:19	F384L	384	67.6133	FLFILVVAA
FGFR3	HLA-A-02:19	F384L	387	73.027	ILVVAAVTL
KRAS	HLA-A-02:19	Q61H	51	11.699	CLLDILDTA
KRAS	HLA-A-02:19	D47V	51	11.699	CLLDILDTA
MAP2K1	HLA-A-02:19	D67Y	73	73.0488	ELGAGNGGV
PIK3CA	HLA-A-02:19	M697T	686	25.0951	LLLESYCRA
SMAD4	HLA-A-02:19	A406V	401	4.70369	CLSDHAVFV
TP53	HLA-A-02:19	R280T	264	12.7542	LLGRNSFEV
TP53	HLA-A-02:19	P278L	264	12.7542	LLGRNSFEV
TP53	HLA-A-02:19	V274F	264	12.7542	LLGRNSFEV
TP53	HLA-A-02:19	R273L	264	12.7542	LLGRNSFEV
TP53	HLA-A-02:19	E68K	65	13.0306	RMPEAAPPV
AKT1	HLA-A-02:50	W22C	8	35.9349	KEGWLHKRG
AKT1	HLA-A-02:50	W22C	11	8.15123	WLHKRGEYI
AKT1	HLA-A-02:50	W22C	13	26.083	HKRGEYIKT
AKT1	HLA-A-02:50	W22C	16	17.2987	GEYIKTWRP
AKT1	HLA-A-02:50	W22C	20	32.7379	KTWRPRYFL
AKT1	HLA-A-02:50	W22C	21	19.3913	TWRPRYFLL
AKT1	HLA-A-02:50	W22C	26	5.50368	YFLLKNDGT
AKT1	HLA-A-02:50	W22C	27	63.7913	FLLKNDGTF
AKT1	HLA-A-02:50	W22C	28	10.5442	LLKNDGTFI
AKT1	HLA-A-02:50	W22C	29	37.6281	LKNDGTFIG
AKT1	HLA-A-02:50	E17L	1	90.8634	MSDVAIVKE
AKT1	HLA-A-02:50	E17L	5	97.3957	AIVKEGWLH
AKT1	HLA-A-02:50	E17L	8	35.9349	KEGWLHKRG
AKT1	HLA-A-02:50	E17L	11	8.15123	WLHKRGEYI
AKT1	HLA-A-02:50	E17L	13	26.083	HKRGEYIKT
AKT1	HLA-A-02:50	E17L	16	17.2987	GEYIKTWRP
AKT1	HLA-A-02:50	E17L	20	32.7379	KTWRPRYFL
AKT1	HLA-A-02:50	E17L	21	19.3913	TWRPRYFLL
BRAF	HLA-A-02:50	K601E	589	41.1866	TVKIGDFGL
BRAF	HLA-A-02:50	K601E	590	23.9208	VKIGDFGLA
BRAF	HLA-A-02:50	K601E	591	3.66618	KIGDFGLAT
BRAF	HLA-A-02:50	K601E	592	7.17896	IGDFGLATV
BRAF	HLA-A-02:50	K601E	599	84.8202	TVKSRWSGS
BRAF	HLA-A-02:50	K601E	601	38.9754	KSRWSGSHQ
BRAF	HLA-A-02:50	K601E	603	41.5009	RWSGSHQFE
BRAF	HLA-A-02:50	K601E	604	31.1107	WSGSHQFEQ
BRAF	HLA-A-02:50	K601E	605	39.2176	SGSHQFEQL
BRAF	HLA-A-02:50	K601E	606	53.2426	GSHQFEQLS
BRAF	HLA-A-02:50	K601E	608	38.6243	HQFEQLSGS
BRAF	HLA-A-02:50	V590I	574	43.8794	HRDLKSNNI
BRAF	HLA-A-02:50	V590I	576	55.3975	DLKSNNIFL
BRAF	HLA-A-02:50	V590I	578	47.8051	KSNNIFLHE
BRAF	HLA-A-02:50	V590I	579	88.3968	SNNIFLHED
BRAF	HLA-A-02:50	V590I	580	35.2672	NNIFLHEDL
BRAF	HLA-A-02:50	V590I	581	8.89116	NIFLHEDLT
BRAF	HLA-A-02:50	V590I	582	3.57845	IFLHEDLTV
BRAF	HLA-A-02:50	V590I	583	65.4578	FLHEDLTVK
BRAF	HLA-A-02:50	V590I	584	49.5641	LHEDLTVKI
BRAF	HLA-A-02:50	V590I	589	41.1866	TVKIGDFGL
BRAF	HLA-A-02:50	V590I	590	23.9208	VKIGDFGLA
BRAF	HLA-A-02:50	V590I	591	3.66618	KIGDFGLAT
BRAF	HLA-A-02:50	V590I	592	7.17896	IGDFGLATV
BRAF	HLA-A-02:50	G466A	450	13.4885	WEIPDGQIT
BRAF	HLA-A-02:50	G466A	451	53.6747	EIPDGQITV
BRAF	HLA-A-02:50	G466A	452	91.0394	IPDGQITVG
BRAF	HLA-A-02:50	G466A	455	51.9877	GQITVGQRI
BRAF	HLA-A-02:50	G466A	457	83.9401	ITVGQRIGS
BRAF	HLA-A-02:50	G466A	462	8.79924	RIGSGSFGT
BRAF	HLA-A-02:50	G466A	463	10.1276	IGSGSFGTV
BRAF	HLA-A-02:50	G466A	471	65.7909	VYKGKWHGD
BRAF	HLA-A-02:50	G466A	472	6.00243	YKGKWHGDV
BRAF	HLA-A-02:50	G466A	473	4.69005	KGKWHGDVA
BRAF	HLA-A-02:50	G466A	474	11.4239	GKWHGDVAV
DDR2	HLA-A-02:50	L94F	83	31.701	LKEFLQIDL
DDR2	HLA-A-02:50	L94F	86	1.3892	FLQIDLHTL
DDR2	HLA-A-02:50	L94F	89	13.7343	IDLHTLHFI
DDR2	HLA-A-02:50	L94F	90	44.5785	DLHTLHFIT
DDR2	HLA-A-02:50	L94F	91	43.593	LHTLHFITL
DDR2	HLA-A-02:50	L94F	92	24.6509	HTLHFITLV
DDR2	HLA-A-02:50	L94F	93	36.6356	TLHFITLVG
DDR2	HLA-A-02:50	L94F	94	52.7065	LHFITLVGT
DDR2	HLA-A-02:50	L94F	95	33.5364	HFITLVGTQ
DDR2	HLA-A-02:50	L94F	96	8.4933	FITLVGTQG
DDR2	HLA-A-02:50	L94F	99	25.6342	LVGTQGRHA
DDR2	HLA-A-02:50	W771*	758	13.0183	SILLGKFTT
DDR2	HLA-A-02:50	W771*	759	3.45977	ILLGKFTTA
DDR2	HLA-A-02:50	W771*	760	21.1697	LLGKFTTAS
DDR2	HLA-A-02:50	W771*	762	9.07098	GKFTTASDV
DDR2	HLA-A-02:50	W771*	763	63.4074	KFTTASDVW
DDR2	HLA-A-02:50	W771*	764	21.3686	FTTASDVWA
DDR2	HLA-A-02:50	W771*	767	5.94024	ASDVWAFGV
DDR2	HLA-A-02:50	W771*	768	78.7822	SDVWAFGVT
DDR2	HLA-A-02:50	W771*	771	47.9788	WAFGVTLWE
DDR2	HLA-A-02:50	W771*	772	3.48653	AFGVTLWET
DDR2	HLA-A-02:50	W771*	774	15.174	GVTLWETFT
DDR2	HLA-A-02:50	W771*	776	30.2959	TLWETFTFC
DDR2	HLA-A-02:50	W771*	777	31.2917	LWETFTFCQ
DDR2	HLA-A-02:50	W771*	778	13.5555	WETFTFCQE
EGFR	HLA-A-02:50	T710I	694	99.4833	PSGEAPNQA
EGFR	HLA-A-02:50	T710I	696	15.4846	GEAPNQALL
EGFR	HLA-A-02:50	T710I	698	52.154	APNQALLRI
EGFR	HLA-A-02:50	T710I	702	5.44315	ALLRILKET
EGFR	HLA-A-02:50	T710I	703	17.9103	LLRILKETE
EGFR	HLA-A-02:50	T710I	707	69.5896	LKETEFKKI
EGFR	HLA-A-02:50	T710I	710	71.9668	TEFKKIKVL
EGFR	HLA-A-02:50	T710I	712	14.0392	FKKIKVLGS
EGFR	HLA-A-02:50	T710I	713	50.3831	KKIKVLGSG
EGFR	HLA-A-02:50	T710I	714	2.35084	KIKVLGSGA
EGFR	HLA-A-02:50	T710I	716	41.6178	KVLGSGAFG
EGFR	HLA-A-02:50	T710I	717	6.57101	VLGSGAFGT
EGFR	HLA-A-02:50	T710I	718	25.0945	LGSGAFGTV
EGFR	HLA-A-02:50	R748T	732	64.5681	IPEGEKVKI
EGFR	HLA-A-02:50	R748T	733	79.8019	PEGEKVKIP
EGFR	HLA-A-02:50	R748T	735	12.665	GEKVKIPVA
EGFR	HLA-A-02:50	R748T	738	84.6929	VKIPVAIKE
EGFR	HLA-A-02:50	R748T	739	3.9526	KIPVAIKEL
EGFR	HLA-A-02:50	R748T	742	66.3683	VAIKELREA
EGFR	HLA-A-02:50	R748T	743	4.28837	AIKELREAT
EGFR	HLA-A-02:50	R748T	744	31.0652	IKELREATS
EGFR	HLA-A-02:50	R748T	745	9.39808	KELREATSP
EGFR	HLA-A-02:50	R748T	747	30.9583	LREATSPKA
EGFR	HLA-A-02:50	R748T	750	66.2722	ATSPKANKE
EGFR	HLA-A-02:50	R748T	752	88.0433	SPKANKEIL
EGFR	HLA-A-02:50	R748T	754	58.0895	KANKEILDE
EGFR	HLA-A-02:50	R748T	755	4.00224	ANKEILDEA
EGFR	HLA-A-02:50	V769A	754	58.0895	KANKEILDE
EGFR	HLA-A-02:50	V769A	755	4.00224	ANKEILDEA
EGFR	HLA-A-02:50	V769A	757	5.36613	KEILDEAYV
EGFR	HLA-A-02:50	V769A	759	2.65821	ILDEAYVMA
EGFR	HLA-A-02:50	V769A	760	87.0575	LDEAYVMAS
EGFR	HLA-A-02:50	V769A	763	70.5093	AYVMASVDN
EGFR	HLA-A-02:50	V769A	764	5.34409	YVMASVDNP
EGFR	HLA-A-02:50	V769A	766	12.4476	MASVDNPHV
EGFR	HLA-A-02:50	V769A	767	27.7994	ASVDNPHVC
EGFR	HLA-A-02:50	V769A	769	41.9628	VDNPHVCRL
EGFR	HLA-A-02:50	V769A	773	86.9967	HVCRLLGIC
EGFR	HLA-A-02:50	V769A	774	55.3009	VCRLLGICL
EGFR	HLA-A-02:50	V769A	775	19.1593	CRLLGICLT
EGFR	HLA-A-02:50	V769A	776	23.7104	RLLGICLTS
EGFR	HLA-A-02:50	V769A	777	10.4189	LLGICLTST
EGFR	HLA-A-02:50	G873R	857	16.0956	GLAKLLGAE
EGFR	HLA-A-02:50	G873R	860	4.79333	KLLGAEEKE
EGFR	HLA-A-02:50	G873R	863	18.8441	GAEEKEYHA
EGFR	HLA-A-02:50	G873R	864	24.6014	AEEKEYHAE
EGFR	HLA-A-02:50	G873R	869	6.52243	YHAEGGKVP
EGFR	HLA-A-02:50	G873R	870	93.5066	HAEGGKVPI
EGFR	HLA-A-02:50	G873R	874	6.02717	GKVPIKWMA
EGFR	HLA-A-02:50	G873R	875	17.3095	KVPIKWMAL
EGFR	HLA-A-02:50	G873R	877	40.7688	PIKWMALES
EGFR	HLA-A-02:50	G873R	878	12.8406	IKWMALESI
EGFR	HLA-A-02:50	G873R	879	7.07931	KWMALESIL
EGFR	HLA-A-02:50	G873R	880	78.3775	WMALESILH
EGFR	HLA-A-02:50	p.746_750delA	730	10.8893	LWIPEGEKV
EGFR	HLA-A-02:50	p.746_750delA	732	64.5681	IPEGEKVKI
EGFR	HLA-A-02:50	p.746_750delA	733	79.8019	PEGEKVKIP
EGFR	HLA-A-02:50	p.746_750delA	735	12.665	GEKVKIPVA
EGFR	HLA-A-02:50	p.746_750delA	738	84.6929	VKIPVAIKE
EGFR	HLA-A-02:50	p.746_750delA	739	3.9526	KIPVAIKEL
EGFR	HLA-A-02:50	p.746_750delA	742	66.3683	VAIKELREA
EGFR	HLA-A-02:50	p.746_750delA	743	4.28837	AIKELREAT
EGFR	HLA-A-02:50	p.746_750delA	744	31.0652	IKELREATS
EGFR	HLA-A-02:50	p.746_750delA	745	9.39808	KELREATSP
EGFR	HLA-A-02:50	p.746_750delA	747	30.9583	LREATSPKA
EGFR	HLA-A-02:50	p.746_750delA	750	66.2722	ATSPKANKE
EGFR	HLA-A-02:50	p.746_750delA	752	88.0433	SPKANKEIL
EGFR	HLA-A-02:50	p.746_750delA	754	58.0895	KANKEILDE
ERBB4	HLA-A-02:50	P594L	579	3.47517	KCSHFKDGP
ERBB4	HLA-A-02:50	P594L	582	3.23765	HFKDGPNCV
ERBB4	HLA-A-02:50	P594L	583	9.7833	FKDGPNCVE
ERBB4	HLA-A-02:50	P594L	586	42.253	GPNCVEKCP
ERBB4	HLA-A-02:50	P594L	589	23.4823	CVEKCPDGL
ERBB4	HLA-A-02:50	P594L	592	3.48575	KCPDGLQGA
ERBB4	HLA-A-02:50	P594L	596	7.69698	GLQGANSFI
ERBB4	HLA-A-02:50	P594L	600	8.5992	ANSFIFKYA
ERBB4	HLA-A-02:50	P594L	602	23.7625	SFIFKYADP
ERBB4	HLA-A-02:50	G338D	322	23.4714	MCKPCTDIC
ERBB4	HLA-A-02:50	G338D	323	17.7246	CKPCTDICP
ERBB4	HLA-A-02:50	G338D	325	57.1466	PCTDICPKA
ERBB4	HLA-A-02:50	G338D	329	21.7875	ICPKACDGI
ERBB4	HLA-A-02:50	G338D	331	87.1477	PKACDGIGT
ERBB4	HLA-A-02:50	G338D	332	54.182	KACDGIGTG
ERBB4	HLA-A-02:50	G338D	333	21.3657	ACDGIGTGS
ERBB4	HLA-A-02:50	G338D	334	55.1347	CDGIGTGSL
ERBB4	HLA-A-02:50	G338D	336	10.4752	GIGTGSLMS
ERBB4	HLA-A-02:50	G338D	337	7.6262	IGTGSLMSA
ERBB4	HLA-A-02:50	G338D	339	53.0578	TGSLMSAQT
ERBB4	HLA-A-02:50	G338D	340	18.6165	GSLMSAQTV
ERBB4	HLA-A-02:50	G338D	341	37.7755	SLMSAQTVD
ERBB4	HLA-A-02:50	G338D	342	21.0726	LMSAQTVDS
ERBB4	HLA-A-02:50	G338D	343	31.7557	MSAQTVDSS
ERBB4	HLA-A-02:50	G338D	345	17.2452	AQTVDSSNI
FBXW7	HLA-A-02:50	R505G	491	76.035	GQCLHVLMG
FBXW7	HLA-A-02:50	R505G	493	5.22965	CLHVLMGHV
FBXW7	HLA-A-02:50	R505G	494	12.3649	LHVLMGHVA
FBXW7	HLA-A-02:50	R505G	495	28.3818	HVLMGHVAA
FBXW7	HLA-A-02:50	R505G	496	6.21539	VLMGHVAAV
FBXW7	HLA-A-02:50	R505G	498	87.2246	MGHVAAVRC
FBXW7	HLA-A-02:50	R505G	499	10.4925	GHVAAVRCV
FBXW7	HLA-A-02:50	R505G	500	47.5045	HVAAVRCVQ
FBXW7	HLA-A-02:50	R505G	502	72.1081	AAVRCVQYD
FBXW7	HLA-A-02:50	R505G	503	35.9091	AVRCVQYDG
FBXW7	HLA-A-02:50	R505G	506	12.6515	CVQYDGRRV
FBXW7	HLA-A-02:50	R505G	507	17.0798	VQYDGRRVV
FBXW7	HLA-A-02:50	R505G	509	67.02	YDGRRVVSG
FBXW7	HLA-A-02:50	V485I	470	50.1545	HEKRVVSGS
FBXW7	HLA-A-02:50	V485I	472	43.7502	KRVVSGSRD
FBXW7	HLA-A-02:50	V485I	473	37.2842	RVVSGSRDA
FBXW7	HLA-A-02:50	V485I	474	37.1612	VVSGSRDAT
FBXW7	HLA-A-02:50	V485I	477	20.08	GSRDATLRV
FBXW7	HLA-A-02:50	V485I	481	79.6531	ATLRVWDIE
FBXW7	HLA-A-02:50	V485I	482	13.9545	TLRVWDIET
FBXW7	HLA-A-02:50	V485I	483	52.931	LRVWDIETG
FBXW7	HLA-A-02:50	V485I	484	70.2565	RVWDIETGQ
FBXW7	HLA-A-02:50	V485I	486	17.4728	WDIETGQCL
FBXW7	HLA-A-02:50	V485I	488	6.09457	IETGQCLHV
FBXW7	HLA-A-02:50	V485I	491	76.035	GQCLHVLMG
FBXW7	HLA-A-02:50	V485I	493	5.22965	CLHVLMGHV
FGFR2	HLA-A-02:50	V395A	379	4.6149	AIYCIGVFL
FGFR2	HLA-A-02:50	V395A	380	9.61597	IYCIGVFLI
FGFR2	HLA-A-02:50	V395A	381	8.49104	YCIGVFLIA
FGFR2	HLA-A-02:50	V395A	382	25.6028	CIGVFLIAC
FGFR2	HLA-A-02:50	V395A	384	7.25371	GVFLIACMV
FGFR2	HLA-A-02:50	V395A	385	11.1241	VFLIACMVV
FGFR2	HLA-A-02:50	V395A	386	3.50017	FLIACMVVT
FGFR2	HLA-A-02:50	V395A	387	3.10284	LIACMVVTV
FGFR2	HLA-A-02:50	V395A	388	37.4632	IACMVVTVI
FGFR2	HLA-A-02:50	V395A	389	15.6879	ACMVVTVIL
FGFR2	HLA-A-02:50	V395A	390	15.7536	CMVVTVILC
FGFR2	HLA-A-02:50	V395A	395	24.0479	VILCRMKNT
FGFR2	HLA-A-02:50	V395A	396	4.01194	ILCRMKNTT
FGFR2	HLA-A-02:50	V395A	399	8.90436	RMKNTTKKP
FGFR2	HLA-A-02:50	V395A	400	52.2745	MKNTTKKPD
FGFR2	HLA-A-02:50	A362A	346	90.5791	NSIGISFHS
FGFR2	HLA-A-02:50	A362A	347	9.6874	SIGISFHSA
FGFR2	HLA-A-02:50	A362A	349	6.02963	GISFHSAWL
FGFR2	HLA-A-02:50	A362A	350	17.3619	ISFHSAWLT
FGFR2	HLA-A-02:50	A362A	351	12.8039	SFHSAWLTV
FGFR2	HLA-A-02:50	A362A	352	4.62509	FHSAWLTVL
FGFR2	HLA-A-02:50	A362A	353	24.4831	HSAWLTVLP
FGFR2	HLA-A-02:50	A362A	354	69.017	SAWLTVLPA
FGFR2	HLA-A-02:50	A362A	355	8.1158	AWLTVLPAP
FGFR2	HLA-A-02:50	A362A	356	13.1566	WLTVLPAPG
FGFR2	HLA-A-02:50	A362A	362	25.0917	APGREKEIT
FGFR2	HLA-A-02:50	A362A	364	53.1889	GREKEITAS
FGFR2	HLA-A-02:50	A362A	365	37.2838	REKEITASP
FGFR2	HLA-A-02:50	A362A	369	58.4336	ITASPDYLE
FGFR2	HLA-A-02:50	S299N	286	40.9999	PHIQWIKHV
FGFR2	HLA-A-02:50	S299N	287	7.35381	HIQWIKHVE
FGFR2	HLA-A-02:50	S299N	290	14.9502	WIKHVEKNG
FGFR2	HLA-A-02:50	S299N	291	17.3591	IKHVEKNGS
FGFR2	HLA-A-02:50	S299N	296	36.9285	KNGSKYGPD
FGFR2	HLA-A-02:50	S299N	298	24.1124	GSKYGPDGL
FGFR2	HLA-A-02:50	S299N	299	39.3743	SKYGPDGLP
FGFR2	HLA-A-02:50	S299N	301	7.28124	YGPDGLPYL
FGFR2	HLA-A-02:50	S299N	306	76.375	LPYLKVLKA
FGFR2	HLA-A-02:50	E275K	260	31.1328	AGLPANAST
FGFR2	HLA-A-02:50	E275K	261	2.41489	GLPANASTV
FGFR2	HLA-A-02:50	E275K	262	25.4206	LPANASTVV
FGFR2	HLA-A-02:50	E275K	264	33.072	ANASTVVGG
FGFR2	HLA-A-02:50	E275K	266	23.268	ASTVVGGDV
FGFR2	HLA-A-02:50	E275K	269	8.27529	VVGGDVEFV
FGFR2	HLA-A-02:50	E275K	270	62.8689	VGGDVEFVC
FGFR2	HLA-A-02:50	E275K	272	7.2976	GDVEFVCKV
FGFR2	HLA-A-02:50	E275K	274	91.3594	VEFVCKVYS
FGFR2	HLA-A-02:50	E275K	276	8.60959	FVCKVYSDA
FGFR2	HLA-A-02:50	E275K	277	90.9584	VCKVYSDAQ
FGFR2	HLA-A-02:50	E275K	278	15.3694	CKVYSDAQP
FGFR2	HLA-A-02:50	E275K	280	28.7638	VYSDAQPHI
FGFR2	HLA-A-02:50	E275K	281	34.481	YSDAQPHIQ
FGFR2	HLA-A-02:50	A266T	252	84.1099	SPHRPILQA
FGFR2	HLA-A-02:50	A266T	254	39.3442	HRPILQAGL
FGFR2	HLA-A-02:50	A266T	255	88.1619	RPILQAGLP
FGFR2	HLA-A-02:50	A266T	256	37.3709	PILQAGLPA
FGFR2	HLA-A-02:50	A266T	257	24.0597	ILQAGLPAN
FGFR2	HLA-A-02:50	A266T	258	18.2909	LQAGLPANA
FGFR2	HLA-A-02:50	A266T	260	31.1328	AGLPANAST
FGFR2	HLA-A-02:50	A266T	261	2.41489	GLPANASTV
FGFR2	HLA-A-02:50	A266T	262	25.4206	LPANASTVV
FGFR2	HLA-A-02:50	A266T	264	33.072	ANASTVVGG
FGFR2	HLA-A-02:50	A266T	266	23.268	ASTVVGGDV
FGFR2	HLA-A-02:50	A266T	269	8.27529	VVGGDVEFV
FGFR2	HLA-A-02:50	A266T	270	62.8689	VGGDVEFVC
FGFR2	HLA-A-02:50	A266T	272	7.2976	GDVEFVCKV
FGFR2	HLA-A-02:50	A266T	274	91.3594	VEFVCKVYS
FGFR3	HLA-A-02:50	R252W	236	38.6672	SIRQTYTLD
FGFR3	HLA-A-02:50	R252W	237	7.95774	IRQTYTLDV
FGFR3	HLA-A-02:50	R252W	238	20.4454	RQTYTLDVL
FGFR3	HLA-A-02:50	R252W	241	40.7489	YTLDVLERS
FGFR3	HLA-A-02:50	R252W	242	10.3872	TLDVLERSP
FGFR3	HLA-A-02:50	R252W	245	7.54623	VLERSPHRP
FGFR3	HLA-A-02:50	R252W	246	77.8044	LERSPHRPI
FGFR3	HLA-A-02:50	R252W	249	84.1099	SPHRPILQA
FGFR3	HLA-A-02:50	R252W	251	39.3442	HRPILQAGL
FGFR3	HLA-A-02:50	R252W	252	88.1619	RPILQAGLP
FGFR3	HLA-A-02:50	R252W	253	37.3709	PILQAGLPA
FGFR3	HLA-A-02:50	R252W	254	24.0597	ILQAGLPAN
FGFR3	HLA-A-02:50	R252W	255	62.8472	LQAGLPANQ
FGFR3	HLA-A-02:50	R252W	257	12.9684	AGLPANQTA
FGFR3	HLA-A-02:50	R252W	258	3.20476	GLPANQTAV
FGFR3	HLA-A-02:50	R252W	259	65.8321	LPANQTAVL
FGFR3	HLA-A-02:50	G370S	354	59.7713	LVVLPAEEE
FGFR3	HLA-A-02:50	G370S	355	37.2215	VVLPAEEEL
FGFR3	HLA-A-02:50	G370S	356	3.33822	VLPAEEELV
FGFR3	HLA-A-02:50	G370S	357	98.9446	LPAEEELVE
FGFR3	HLA-A-02:50	G370S	359	33.319	AEEELVEAD
FGFR3	HLA-A-02:50	G370S	363	73.0595	LVEADEAGS
FGFR3	HLA-A-02:50	G370S	364	13.1584	VEADEAGSV
FGFR3	HLA-A-02:50	G370S	366	15.7072	ADEAGSVYA
FGFR3	HLA-A-02:50	G370S	369	16.4133	AGSVYAGIL
FGFR3	HLA-A-02:50	G370S	370	70.6	GSVYAGILS
FGFR3	HLA-A-02:50	G370S	372	60.571	VYAGILSYG
FGFR3	HLA-A-02:50	G370S	373	7.46906	YAGILSYGV
FGFR3	HLA-A-02:50	G370S	374	73.1747	AGILSYGVG
FGFR3	HLA-A-02:50	G370S	376	38.8263	ILSYGVGFF
FGFR3	HLA-A-02:50	G370S	377	50.7343	LSYGVGFFL
FGFR3	HLA-A-02:50	S371N	355	37.2215	VVLPAEEEL
FGFR3	HLA-A-02:50	S371N	356	3.33822	VLPAEEELV
FGFR3	HLA-A-02:50	S371N	357	98.9446	LPAEEELVE
FGFR3	HLA-A-02:50	S371N	359	33.319	AEEELVEAD
FGFR3	HLA-A-02:50	S371N	363	73.0595	LVEADEAGS
FGFR3	HLA-A-02:50	S371N	364	13.1584	VEADEAGSV
FGFR3	HLA-A-02:50	S371N	366	15.7072	ADEAGSVYA
FGFR3	HLA-A-02:50	S371N	369	16.4133	AGSVYAGIL
FGFR3	HLA-A-02:50	S371N	370	70.6	GSVYAGILS
FGFR3	HLA-A-02:50	S371N	372	60.571	VYAGILSYG
FGFR3	HLA-A-02:50	S371N	373	7.46906	YAGILSYGV
FGFR3	HLA-A-02:50	S371N	374	73.1747	AGILSYGVG
FGFR3	HLA-A-02:50	S371N	376	38.8263	ILSYGVGFF
FGFR3	HLA-A-02:50	S371N	377	50.7343	LSYGVGFFL
FGFR3	HLA-A-02:50	S371N	379	17.8711	YGVGFFLFI
FGFR3	HLA-A-02:50	F384L	369	16.4133	AGSVYAGIL
FGFR3	HLA-A-02:50	F384L	370	70.6	GSVYAGILS
FGFR3	HLA-A-02:50	F384L	372	60.571	VYAGILSYG
FGFR3	HLA-A-02:50	F384L	373	7.46906	YAGILSYGV
FGFR3	HLA-A-02:50	F384L	374	73.1747	AGILSYGVG
FGFR3	HLA-A-02:50	F384L	376	38.8263	ILSYGVGFF
FGFR3	HLA-A-02:50	F384L	377	50.7343	LSYGVGFFL
FGFR3	HLA-A-02:50	F384L	379	17.8711	YGVGFFLFI
FGFR3	HLA-A-02:50	F384L	380	7.91858	GVGFFLFIL
FGFR3	HLA-A-02:50	F384L	381	23.3782	VGFFLFILV
FGFR3	HLA-A-02:50	F384L	382	4.29135	GFFLFILVV
FGFR3	HLA-A-02:50	F384L	383	2.14001	FFLFILVVA
FGFR3	HLA-A-02:50	F384L	384	2.53697	FLFILVVAA
FGFR3	HLA-A-02:50	F384L	385	12.4304	LFILVVAAV
FGFR3	HLA-A-02:50	F384L	386	4.10187	FILVVAAVT
FGFR3	HLA-A-02:50	F384L	387	5.37324	ILVVAAVTL
FGFR3	HLA-A-02:50	F384L	388	86.8063	LVVAAVTLC
FGFR3	HLA-A-02:50	F384L	390	55.9574	VAAVTLCRL
FGFR3	HLA-A-02:50	F384L	392	25.4755	AVTLCRLRS
FGFR3	HLA-A-02:50	S787F	773	31.889	GGQDTPSSS
FGFR3	HLA-A-02:50	S787F	774	50.0421	GQDTPSSSS
FGFR3	HLA-A-02:50	S787F	780	30.1756	SSSSGDDSV
FGFR3	HLA-A-02:50	S787F	782	40.9704	SSGDDSVFA
FGFR3	HLA-A-02:50	S787F	787	46.4946	SVFAHDLLP
FGFR3	HLA-A-02:50	S787F	788	9.33717	VFAHDLLPP
FGFR3	HLA-A-02:50	S787F	789	5.89602	FAHDLLPPA
FGFR3	HLA-A-02:50	S787F	790	10.1399	AHDLLPPAP
FGFR3	HLA-A-02:50	S787F	791	45.3739	HDLLPPAPP
FGFR3	HLA-A-02:50	S787F	793	14.6823	LLPPAPPSS
FGFR3	HLA-A-02:50	A790T	774	50.0421	GQDTPSSSS
FGFR3	HLA-A-02:50	A790T	780	30.1756	SSSSGDDSV
FGFR3	HLA-A-02:50	A790T	782	40.9704	SSGDDSVFA
FGFR3	HLA-A-02:50	A790T	787	46.4946	SVFAHDLLP
FGFR3	HLA-A-02:50	A790T	788	9.33717	VFAHDLLPP
FGFR3	HLA-A-02:50	A790T	789	5.89602	FAHDLLPPA
FGFR3	HLA-A-02:50	A790T	790	10.1399	AHDLLPPAP
FGFR3	HLA-A-02:50	A790T	791	45.3739	HDLLPPAPP
FGFR3	HLA-A-02:50	A790T	793	14.6823	LLPPAPPSS
KRAS	HLA-A-02:50	K117N	101	5.66916	KRVKDSEDV
KRAS	HLA-A-02:50	K117N	102	15.596	RVKDSEDVP
KRAS	HLA-A-02:50	K117N	104	3.12339	KDSEDVPMV
KRAS	HLA-A-02:50	K117N	106	31.0421	SEDVPMVLV
KRAS	HLA-A-02:50	K117N	111	84.4879	MVLVGNKCD
KRAS	HLA-A-02:50	K117N	112	8.75589	VLVGNKCDL
KRAS	HLA-A-02:50	K117N	113	12.4074	LVGNKCDLP
KRAS	HLA-A-02:50	K117N	116	24.6395	NKCDLPSRT
KRAS	HLA-A-02:50	K117N	117	6.90775	KCDLPSRTV
KRAS	HLA-A-02:50	K117N	122	26.5644	SRTVDTKQA
KRAS	HLA-A-02:50	K117N	125	83.7215	VDTKQAQDL
KRAS	HLA-A-02:50	Q61H	45	7.06528	VIDGETCLL
KRAS	HLA-A-02:50	Q61H	46	47.9629	IDGETCLLD
KRAS	HLA-A-02:50	Q61H	48	9.5148	GETCLLDIL
KRAS	HLA-A-02:50	Q61H	50	63.3996	TCLLDILDT
KRAS	HLA-A-02:50	Q61H	51	2.52403	CLLDILDTA
KRAS	HLA-A-02:50	Q61H	52	59.6976	LLDILDTAG
KRAS	HLA-A-02:50	Q61H	55	8.22801	ILDTAGQEE
KRAS	HLA-A-02:50	Q61H	58	32.81	TAGQEEYSA
KRAS	HLA-A-02:50	Q61H	66	2.48108	AMRDQYMRT
KRAS	HLA-A-02:50	Q61H	67	68.2159	MRDQYMRTG
KRAS	HLA-A-02:50	Q61H	68	69.9634	RDQYMRTGE
KRAS	HLA-A-02:50	D47V	35	30.0279	TIEDSYRKQ
KRAS	HLA-A-02:50	D47V	36	6.56374	IEDSYRKQV
KRAS	HLA-A-02:50	D47V	40	47.5591	YRKQVVIDG
KRAS	HLA-A-02:50	D47V	41	43.4292	RKQVVIDGE
KRAS	HLA-A-02:50	D47V	42	19.2767	KQVVIDGET
KRAS	HLA-A-02:50	D47V	44	31.187	VVIDGETCL
KRAS	HLA-A-02:50	D47V	45	7.06528	VIDGETCLL
KRAS	HLA-A-02:50	D47V	46	47.9629	IDGETCLLD
KRAS	HLA-A-02:50	D47V	48	9.5148	GETCLLDIL
KRAS	HLA-A-02:50	D47V	50	63.3996	TCLLDILDT
KRAS	HLA-A-02:50	D47V	51	2.52403	CLLDILDTA
KRAS	HLA-A-02:50	D47V	52	59.6976	LLDILDTAG
KRAS	HLA-A-02:50	D47V	55	8.22801	ILDTAGQEE
KRAS	HLA-A-02:50	R41S	26	23.6414	NHFVDEYDP
KRAS	HLA-A-02:50	R41S	27	6.99768	HFVDEYDPT
KRAS	HLA-A-02:50	R41S	28	11.6794	FVDEYDPTI
KRAS	HLA-A-02:50	R41S	29	68.6208	VDEYDPTIE
KRAS	HLA-A-02:50	R41S	35	30.0279	TIEDSYRKQ
KRAS	HLA-A-02:50	R41S	36	6.56374	IEDSYRKQV
KRAS	HLA-A-02:50	R41S	40	47.5591	YRKQVVIDG
KRAS	HLA-A-02:50	R41S	41	43.4292	RKQVVIDGE
KRAS	HLA-A-02:50	R41S	42	19.2767	KQVVIDGET
KRAS	HLA-A-02:50	R41S	44	31.187	VVIDGETCL
KRAS	HLA-A-02:50	R41S	45	7.06528	VIDGETCLL
KRAS	HLA-A-02:50	R41S	46	47.9629	IDGETCLLD
KRAS	HLA-A-02:50	R41S	48	9.5148	GETCLLDIL
KRAS	HLA-A-02:50	G12V	1	20.5906	MTEYKLVVV
KRAS	HLA-A-02:50	G12V	4	52.4818	YKLVVVGAG
KRAS	HLA-A-02:50	G12V	5	15.0157	KLVVVGAGG
KRAS	HLA-A-02:50	G12V	6	17.5342	LVVVGAGGV
KRAS	HLA-A-02:50	G12V	9	83.1766	VGAGGVGKS
KRAS	HLA-A-02:50	G12V	10	37.8078	GAGGVGKSA
KRAS	HLA-A-02:50	G12V	11	17.9605	AGGVGKSAL
KRAS	HLA-A-02:50	G12V	12	32.161	GGVGKSALT
KRAS	HLA-A-02:50	G12V	13	46.7069	GVGKSALTI
KRAS	HLA-A-02:50	G12V	14	98.8864	VGKSALTIQ
KRAS	HLA-A-02:50	G12V	15	15.7546	GKSALTIQL
KRAS	HLA-A-02:50	G12V	16	21.2023	KSALTIQLI
KRAS	HLA-A-02:50	G12V	18	18.2685	ALTIQLIQN
KRAS	HLA-A-02:50	G12C	1	20.5906	MTEYKLVVV
KRAS	HLA-A-02:50	G12C	4	52.4818	YKLVVVGAG
KRAS	HLA-A-02:50	G12C	5	15.0157	KLVVVGAGG
KRAS	HLA-A-02:50	G12C	6	17.5342	LVVVGAGGV
KRAS	HLA-A-02:50	G12C	9	83.1766	VGAGGVGKS
KRAS	HLA-A-02:50	G12C	10	37.8078	GAGGVGKSA
KRAS	HLA-A-02:50	G12C	11	17.9605	AGGVGKSAL
KRAS	HLA-A-02:50	G12C	12	32.161	GGVGKSALT
KRAS	HLA-A-02:50	G12C	13	46.7069	GVGKSALTI
KRAS	HLA-A-02:50	G12C	14	98.8864	VGKSALTIQ
KRAS	HLA-A-02:50	G12C	15	15.7546	GKSALTIQL
KRAS	HLA-A-02:50	G12C	16	21.2023	KSALTIQLI
KRAS	HLA-A-02:50	G12C	18	18.2685	ALTIQLIQN
MAP2K1	HLA-A-02:50	D67Y	52	3.12058	AFLTQKQKV
MAP2K1	HLA-A-02:50	D67Y	53	7.39755	FLTQKQKVG
MAP2K1	HLA-A-02:50	D67Y	55	55.4694	TQKQKVGEL
MAP2K1	HLA-A-02:50	D67Y	57	45.4779	KQKVGELKD
MAP2K1	HLA-A-02:50	D67Y	59	23.4783	KVGELKDDD
MAP2K1	HLA-A-02:50	D67Y	61	36.354	GELKDDDFE
MAP2K1	HLA-A-02:50	D67Y	63	32.3554	LKDDDFEKI
MAP2K1	HLA-A-02:50	D67Y	64	16.7827	KDDDFEKIS
MAP2K1	HLA-A-02:50	D67Y	68	6.66321	FEKISELGA
MAP2K1	HLA-A-02:50	D67Y	70	18.6274	KISELGAGN
MAP2K1	HLA-A-02:50	D67Y	73	85.3754	ELGAGNGGV
MAP2K1	HLA-A-02:50	D67Y	74	17.0447	LGAGNGGVV
MET	HLA-A-02:50	N375S	359	58.9367	RSAMCAFPI
MET	HLA-A-02:50	N375S	362	6.03405	MCAFPIKYV
MET	HLA-A-02:50	N375S	364	28.929	AFPIKYVND
MET	HLA-A-02:50	N375S	367	42.3948	IKYVNDFFN
MET	HLA-A-02:50	N375S	369	13.3358	YVNDFFNKI
MET	HLA-A-02:50	N375S	370	17.2811	VNDFFNKIV
MET	HLA-A-02:50	N375S	373	24.7596	FFNKIVNKN
MET	HLA-A-02:50	N375S	374	74.3794	FNKIVNKNN
MET	HLA-A-02:50	N375S	375	11.04	NKIVNKNNV
MET	HLA-A-02:50	N375S	377	78.4972	IVNKNNVRC
MET	HLA-A-02:50	N375S	378	30.6199	VNKNNVRCL
MET	HLA-A-02:50	N375S	379	39.1599	NKNNVRCLQ
MET	HLA-A-02:50	V1237I	1223	45.9201	FGLARDMYD
MET	HLA-A-02:50	V1237I	1225	59.7321	LARDMYDKE
MET	HLA-A-02:50	V1237I	1228	51.063	DMYDKEYYS
MET	HLA-A-02:50	V1237I	1229	4.79249	MYDKEYYSV
MET	HLA-A-02:50	V1237I	1234	33.0293	YYSVHNKTG
MET	HLA-A-02:50	V1237I	1235	10.8957	YSVHNKTGA
MET	HLA-A-02:50	V1237I	1237	90.8371	VHNKTGAKL
MET	HLA-A-02:50	V1237I	1238	17.1903	HNKTGAKLP
MET	HLA-A-02:50	V1237I	1239	12.902	NKTGAKLPV
MET	HLA-A-02:50	V1237I	1243	4.24188	AKLPVKWMA
MET	HLA-A-02:50	V1237I	1244	3.83507	KLPVKWMAL
PIK3CA	HLA-A-02:50	E545K	531	28.9664	LKAISTRDP
PIK3CA	HLA-A-02:50	E545K	532	16.2946	KAISTRDPL
PIK3CA	HLA-A-02:50	E545K	533	6.0185	AISTRDPLS
PIK3CA	HLA-A-02:50	E545K	534	63.4317	ISTRDPLSE
PIK3CA	HLA-A-02:50	E545K	536	37.3809	TRDPLSEIT
PIK3CA	HLA-A-02:50	E545K	539	31.1983	PLSEITEQE
PIK3CA	HLA-A-02:50	E545K	543	27.1052	ITEQEKDFL
PIK3CA	HLA-A-02:50	E545K	550	3.74547	FLWSHRHYC
PIK3CA	HLA-A-02:50	E545K	551	7.90762	LWSHRHYCV
PIK3CA	HLA-A-02:50	E545K	552	26.5515	WSHRHYCVT
PIK3CA	HLA-A-02:50	E545K	553	72.232	SHRHYCVTI
PIK3CA	HLA-A-02:50	M697T	681	58.2072	SQRFGLLLE
PIK3CA	HLA-A-02:50	M697T	684	26.7353	FGLLLESYC
PIK3CA	HLA-A-02:50	M697T	686	4.9365	LLLESYCRA
PIK3CA	HLA-A-02:50	M697T	687	35.0622	LLESYCRAC
PIK3CA	HLA-A-02:50	M697T	688	94.449	LESYCRACG
PIK3CA	HLA-A-02:50	M697T	691	10.342	YCRACGMYL
PIK3CA	HLA-A-02:50	M697T	694	10.1325	ACGMYLKHL
PIK3CA	HLA-A-02:50	M697T	695	80.1639	CGMYLKHLN
PIK3CA	HLA-A-02:50	M697T	697	31.93	MYLKHLNRQ
PIK3CA	HLA-A-02:50	M697T	698	1.0953	YLKHLNRQV
PIK3CA	HLA-A-02:50	M697T	699	48.34	LKHLNRQVE
PIK3CA	HLA-A-02:50	M697T	700	7.377	KHLNRQVEA
PIK3CA	HLA-A-02:50	M697T	702	65.539	LNRQVEAME
PIK3CA	HLA-A-02:50	M697T	704	46.9198	RQVEAMEKL
PIK3CA	HLA-A-02:50	E707K	691	10.342	YCRACGMYL
PIK3CA	HLA-A-02:50	E707K	694	10.1325	ACGMYLKHL
PIK3CA	HLA-A-02:50	E707K	695	80.1639	CGMYLKHLN
PIK3CA	HLA-A-02:50	E707K	697	31.93	MYLKHLNRQ
PIK3CA	HLA-A-02:50	E707K	698	1.0953	YLKHLNRQV
PIK3CA	HLA-A-02:50	E707K	699	48.34	LKHLNRQVE
PIK3CA	HLA-A-02:50	E707K	700	7.377	KHLNRQVEA
PIK3CA	HLA-A-02:50	E707K	702	65.539	LNRQVEAME
PIK3CA	HLA-A-02:50	E707K	704	46.9198	RQVEAMEKL
PIK3CA	HLA-A-02:50	E707K	708	2.90746	AMEKLINLT
PIK3CA	HLA-A-02:50	E707K	709	75.5544	MEKLINLTD
PIK3CA	HLA-A-02:50	E707K	711	1.54971	KLINLTDIL
PIK3CA	HLA-A-02:50	E707K	713	32.22	INLTDILKQ
PIK3CA	HLA-A-02:50	E707K	714	11.4988	NLTDILKQE
PTEN	HLA-A-02:50	S168N	152	14.2652	KPRHQQLLP
PTEN	HLA-A-02:50	S168N	154	32.0754	RHQQLLPSL
PTEN	HLA-A-02:50	S168N	155	36.8639	HQQLLPSLS
PTEN	HLA-A-02:50	S168N	163	66.4322	SSFFFSHRL
PTEN	HLA-A-02:50	S168N	164	15.2894	SFFFSHRLP
PTEN	HLA-A-02:50	S168N	165	14.3235	FFFSHRLPD
PTEN	HLA-A-02:50	S168N	166	41.3142	FFSHRLPDM
PTEN	HLA-A-02:50	S168N	167	13.4674	FSHRLPDMT
PTEN	HLA-A-02:50	S168N	168	36.2966	SHRLPDMTA
PTEN	HLA-A-02:50	S168N	169	60.5702	HRLPDMTAI
PTEN	HLA-A-02:50	S168N	170	12.0324	RLPDMTAII
PTEN	HLA-A-02:50	S168N	173	88.9144	DMTAIIKEI
PTEN	HLA-A-02:50	S168N	174	18.6499	MTAIIKEIV
PTEN	HLA-A-02:50	M174V	163	66.4322	SSFFFSHRL
PTEN	HLA-A-02:50	M174V	164	15.2894	SFFFSHRLP
PTEN	HLA-A-02:50	M174V	165	14.3235	FFFSHRLPD
PTEN	HLA-A-02:50	M174V	166	41.3142	FFSHRLPDM
PTEN	HLA-A-02:50	M174V	167	13.4674	FSHRLPDMT
PTEN	HLA-A-02:50	M174V	168	36.2966	SHRLPDMTA
PTEN	HLA-A-02:50	M174V	169	60.5702	HRLPDMTAI
PTEN	HLA-A-02:50	M174V	170	12.0324	RLPDMTAII
PTEN	HLA-A-02:50	M174V	173	88.9144	DMTAIIKEI
PTEN	HLA-A-02:50	M174V	174	18.6499	MTAIIKEIV
PTEN	HLA-A-02:50	M174V	177	22.9475	IIKEIVSRN
PTEN	HLA-A-02:50	P404L	389	86.9436	VVCQLKVKI
PTEN	HLA-A-02:50	P404L	391	92.5509	CQLKVKIYS
PTEN	HLA-A-02:50	P404L	392	39.8413	QLKVKIYSS
PTEN	HLA-A-02:50	P404L	394	20.8915	KVKIYSSNS
PTEN	HLA-A-02:50	P404L	395	97.507	VKIYSSNSG
PTEN	HLA-A-02:50	P404L	396	2.69432	KIYSSNSGP
PTEN	HLA-A-02:50	P404L	397	12.2371	IYSSNSGPT
PTEN	HLA-A-02:50	P404L	400	93.1806	SNSGPTRRE
PTEN	HLA-A-02:50	P404L	407	68.8632	REDKFMYFE
PTEN	HLA-A-02:50	P404L	409	95.0372	DKFMYFEFP
PTEN	HLA-A-02:50	P404L	410	4.78634	KFMYFEFPQ
PTEN	HLA-A-02:50	P404L	411	1.07372	FMYFEFPQP
PTEN	HLA-A-02:50	P404L	412	9.06515	MYFEFPQPL
SMAD4	HLA-A-02:50	P186L	171	12.3357	SLSTEGHSI
SMAD4	HLA-A-02:50	P186L	174	46.1985	TEGHSIQTI
SMAD4	HLA-A-02:50	P186L	177	37.1852	HSIQTIQHP
SMAD4	HLA-A-02:50	P186L	178	6.72363	SIQTIQHPP
SMAD4	HLA-A-02:50	P186L	179	34.9899	IQTIQHPPS
SMAD4	HLA-A-02:50	P186L	182	13.1196	IQHPPSNRA
SMAD4	HLA-A-02:50	P186L	184	86.1876	HPPSNRAST
SMAD4	HLA-A-02:50	P186L	188	47.8701	NRASTETYS
SMAD4	HLA-A-02:50	P186L	189	58.4048	RASTETYST
SMAD4	HLA-A-02:50	P186L	190	15.5303	ASTETYSTP
SMAD4	HLA-A-02:50	P186L	192	37.6705	TETYSTPAL
SMAD4	HLA-A-02:50	P186L	194	17.6805	TYSTPALLA
SMAD4	HLA-A-02:50	A202T	188	47.8701	NRASTETYS
SMAD4	HLA-A-02:50	A202T	189	58.4048	RASTETYST
SMAD4	HLA-A-02:50	A202T	190	15.5303	ASTETYSTP
SMAD4	HLA-A-02:50	A202T	192	37.6705	TETYSTPAL
SMAD4	HLA-A-02:50	A202T	194	17.6805	TYSTPALLA
SMAD4	HLA-A-02:50	A202T	195	18.6466	YSTPALLAP
SMAD4	HLA-A-02:50	A202T	199	26.2945	ALLAPSESN
SMAD4	HLA-A-02:50	A202T	200	3.96909	LLAPSESNA
SMAD4	HLA-A-02:50	A202T	201	78.9389	LAPSESNAT
SMAD4	HLA-A-02:50	A202T	202	55.6869	APSESNATS
SMAD4	HLA-A-02:50	A202T	204	21.8702	SESNATSTA
SMAD4	HLA-A-02:50	A202T	207	33.4692	NATSTANFP
SMAD4	HLA-A-02:50	A202T	210	52.3376	STANFPNIP
SMAD4	HLA-A-02:50	P312L	296	26.2936	PHPGHYWPV
SMAD4	HLA-A-02:50	P312L	299	20.182	GHYWPVHNE
SMAD4	HLA-A-02:50	P312L	300	20.4814	HYWPVHNEL
SMAD4	HLA-A-02:50	P312L	301	3.79655	YWPVHNELA
SMAD4	HLA-A-02:50	P312L	304	12.795	VHNELAFQP
SMAD4	HLA-A-02:50	P312L	305	26.9381	HNELAFQPP
SMAD4	HLA-A-02:50	P312L	306	61.5379	NELAFQPPI
SMAD4	HLA-A-02:50	P312L	310	5.29829	FQPPISNHP
SMAD4	HLA-A-02:50	P312L	313	61.4475	PISNHPAPE
SMAD4	HLA-A-02:50	P312L	316	79.1007	NHPAPEYWC
SMAD4	HLA-A-02:50	P312L	317	47.7724	HPAPEYWCS
SMAD4	HLA-A-02:50	P312L	319	10.9069	APEYWCSIA
SMAD4	HLA-A-02:50	A327V	313	61.4475	PISNHPAPE
SMAD4	HLA-A-02:50	A327V	316	79.1007	NHPAPEYWC
SMAD4	HLA-A-02:50	A327V	317	47.7724	HPAPEYWCS
SMAD4	HLA-A-02:50	A327V	319	10.9069	APEYWCSIA
SMAD4	HLA-A-02:50	A327V	322	7.6772	YWCSIAYFE
SMAD4	HLA-A-02:50	A327V	325	3.87531	SIAYFEMDV
SMAD4	HLA-A-02:50	A327V	326	43.0293	IAYFEMDVQ
SMAD4	HLA-A-02:50	A327V	327	3.47472	AYFEMDVQV
SMAD4	HLA-A-02:50	A327V	328	11.0724	YFEMDVQVG
SMAD4	HLA-A-02:50	A327V	329	12.4065	FEMDVQVGE
SMAD4	HLA-A-02:50	A327V	333	11.6267	VQVGETFKV
SMAD4	HLA-A-02:50	A327V	334	97.8648	QVGETFKVP
SMAD4	HLA-A-02:50	A406V	391	8.97555	CKGEGDVWV
SMAD4	HLA-A-02:50	A406V	393	66.6392	GEGDVWVRC
SMAD4	HLA-A-02:50	A406V	395	24.3488	GDVWVRCLS
SMAD4	HLA-A-02:50	A406V	398	5.17094	WVRCLSDHA
SMAD4	HLA-A-02:50	A406V	399	18.9064	VRCLSDHAV
SMAD4	HLA-A-02:50	A406V	401	1.97547	CLSDHAVFV
SMAD4	HLA-A-02:50	A406V	402	88.4415	LSDHAVFVQ
SMAD4	HLA-A-02:50	A406V	406	12.1715	AVFVQSYYL
SMAD4	HLA-A-02:50	A406V	407	36.3625	VFVQSYYLD
SMAD4	HLA-A-02:50	A406V	409	40.2242	VQSYYLDRE
SMAD4	HLA-A-02:50	A406V	413	2.82255	YLDREAGRA
SMAD4	HLA-A-02:50	A406V	414	49.7091	LDREAGRAP
STK11	HLA-A-02:50	G52R	44	9.59477	KLIGKYLMG
STK11	HLA-A-02:50	G52R	45	29.8463	LIGKYLMGD
STK11	HLA-A-02:50	G52R	46	27.8789	IGKYLMGDL
STK11	HLA-A-02:50	G52R	47	11.4851	GKYLMGDLL
STK11	HLA-A-02:50	G52R	48	24.0246	KYLMGDLLG
STK11	HLA-A-02:50	G52R	49	3.809	YLMGDLLGE
STK11	HLA-A-02:50	G52R	50	18.3388	LMGDLLGEG
STK11	HLA-A-02:50	G52R	51	32.4796	MGDLLGEGS
STK11	HLA-A-02:50	G52R	55	25.4141	LGEGSYGKV
STK11	HLA-A-02:50	G52R	58	23.8228	GSYGKVKEV
STK11	HLA-A-02:50	G52R	59	34.3043	SYGKVKEVL
STK11	HLA-A-02:50	G52R	60	46.7678	YGKVKEVLD
STK11	HLA-A-02:50	G270E	255	3.35126	FEGDNIYKL
STK11	HLA-A-02:50	G270E	257	62.282	GDNIYKLFE
STK11	HLA-A-02:50	G270E	259	25.1585	NIYKLFENI
STK11	HLA-A-02:50	G270E	260	25.9788	IYKLFENIG
STK11	HLA-A-02:50	G270E	262	10.3709	KLFENIGKG
STK11	HLA-A-02:50	G270E	263	33.2558	LFENIGKGS
STK11	HLA-A-02:50	G270E	266	21.3069	NIGKGSYAI
STK11	HLA-A-02:50	G270E	267	14.1204	IGKGSYAIP
STK11	HLA-A-02:50	G270E	268	52.7713	GKGSYAIPG
STK11	HLA-A-02:50	G270E	269	25.0582	KGSYAIPGD
STK11	HLA-A-02:50	G270E	272	12.0323	YAIPGDCGP
STK11	HLA-A-02:50	G270E	273	3.08421	AIPGDCGPP
STK11	HLA-A-02:50	G270E	274	22.8805	IPGDCGPPL
STK11	HLA-A-02:50	G270E	278	20.0429	CGPPLSDLL
STK11	HLA-A-02:50	L282R	266	21.3069	NIGKGSYAI
STK11	HLA-A-02:50	L282R	267	14.1204	IGKGSYAIP
STK11	HLA-A-02:50	L282R	268	52.7713	GKGSYAIPG
STK11	HLA-A-02:50	L282R	269	25.0582	KGSYAIPGD
STK11	HLA-A-02:50	L282R	272	12.0323	YAIPGDCGP
STK11	HLA-A-02:50	L282R	273	3.08421	AIPGDCGPP
STK11	HLA-A-02:50	L282R	274	22.8805	IPGDCGPPL
STK11	HLA-A-02:50	L282R	278	20.0429	CGPPLSDLL
STK11	HLA-A-02:50	L282R	282	92.6498	LSDLLKGML
STK11	HLA-A-02:50	L282R	285	8.77494	LLKGMLEYE
STK11	HLA-A-02:50	L282R	286	10.1845	LKGMLEYEP
STK11	HLA-A-02:50	L282R	287	6.67528	KGMLEYEPA
STK11	HLA-A-02:50	D284F	268	52.7713	GKGSYAIPG
STK11	HLA-A-02:50	D284F	269	25.0582	KGSYAIPGD
STK11	HLA-A-02:50	D284F	272	12.0323	YAIPGDCGP
STK11	HLA-A-02:50	D284F	273	3.08421	AIPGDCGPP
STK11	HLA-A-02:50	D284F	274	22.8805	IPGDCGPPL
STK11	HLA-A-02:50	D284F	278	20.0429	CGPPLSDLL
STK11	HLA-A-02:50	D284F	282	92.6498	LSDLLKGML
STK11	HLA-A-02:50	D284F	285	8.77494	LLKGMLEYE
STK11	HLA-A-02:50	D284F	286	10.1845	LKGMLEYEP
STK11	HLA-A-02:50	D284F	287	6.67528	KGMLEYEPA
STK11	HLA-A-02:50	D284F	292	14.1738	YEPAKRFSI
STK11	HLA-A-02:50	P326S	310	26.9644	RKKHPPAEA
STK11	HLA-A-02:50	P326S	311	7.01295	KKHPPAEAP
STK11	HLA-A-02:50	P326S	312	4.96727	KHPPAEAPV
STK11	HLA-A-02:50	P326S	313	41.8003	HPPAEAPVP
STK11	HLA-A-02:50	P326S	316	8.4762	AEAPVPIPP
STK11	HLA-A-02:50	P326S	318	19.3052	APVPIPPSP
STK11	HLA-A-02:50	P326S	328	33.0685	TKDRWRSMT
STK11	HLA-A-02:50	P326S	329	4.63408	KDRWRSMTV
STK11	HLA-A-02:50	P326S	331	20.4105	RWRSMTVVP
STK11	HLA-A-02:50	P326S	333	85.5755	RSMTVVPYL
STK11	HLA-A-02:50	P326S	334	12.1053	SMTVVPYLE
TP53	HLA-A-02:50	E339*	323	78.3651	LDGEYFTLQ
TP53	HLA-A-02:50	E339*	328	77.2363	FTLQIRGRE
TP53	HLA-A-02:50	E339*	331	59.5458	QIRGRERFE
TP53	HLA-A-02:50	E339*	335	53.7928	RERFEMFRE
TP53	HLA-A-02:50	E339*	337	64.1495	RFEMFRELN
TP53	HLA-A-02:50	E339*	338	13.3742	FEMFRELNE
TP53	HLA-A-02:50	E339*	339	68.3506	EMFRELNEA
TP53	HLA-A-02:50	E339*	340	7.59471	MFRELNEAL
TP53	HLA-A-02:50	E339*	341	13.8644	FRELNEALE
TP53	HLA-A-02:50	E339*	342	38.835	RELNEALEL
TP53	HLA-A-02:50	E339*	345	26.6364	NEALELKDA
TP53	HLA-A-02:50	E339*	347	3.16812	ALELKDAQA
TP53	HLA-A-02:50	R333C	321	12.2309	KPLDGEYFT
TP53	HLA-A-02:50	R333C	322	18.9747	PLDGEYFTL
TP53	HLA-A-02:50	R333C	323	78.3651	LDGEYFTLQ
TP53	HLA-A-02:50	R333C	328	77.2363	FTLQIRGRE
TP53	HLA-A-02:50	R333C	331	59.5458	QIRGRERFE
TP53	HLA-A-02:50	R333C	335	53.7928	RERFEMFRE
TP53	HLA-A-02:50	R333C	337	64.1495	RFEMFRELN
TP53	HLA-A-02:50	R333C	338	13.3742	FEMFRELNE
TP53	HLA-A-02:50	R333C	339	68.3506	EMFRELNEA
TP53	HLA-A-02:50	R333C	340	7.59471	MFRELNEAL
TP53	HLA-A-02:50	R333C	341	13.8644	FRELNEALE
TP53	HLA-A-02:50	E298*	290	32.5703	RKKGEPHHE
TP53	HLA-A-02:50	E298*	291	5.69838	KKGEPHHEL
TP53	HLA-A-02:50	E298*	292	7.10709	KGEPHHELP
TP53	HLA-A-02:50	E298*	293	14.6055	GEPHHELPP
TP53	HLA-A-02:50	E298*	296	50.2661	HHELPPGST
TP53	HLA-A-02:50	E298*	299	63.0015	LPPGSTKRA
TP53	HLA-A-02:50	E298*	304	34.3724	TKRALPNNT
TP53	HLA-A-02:50	E298*	305	18.8742	KRALPNNTS
TP53	HLA-A-02:50	E287*	276	20.844	ACPGRDRRT
TP53	HLA-A-02:50	E287*	279	43.1662	GRDRRTEEE
TP53	HLA-A-02:50	E287*	290	32.5703	RKKGEPHHE
TP53	HLA-A-02:50	E287*	291	5.69838	KKGEPHHEL
TP53	HLA-A-02:50	E287*	292	7.10709	KGEPHHELP
TP53	HLA-A-02:50	E287*	293	14.6055	GEPHHELPP
TP53	HLA-A-02:50	E286D	270	8.90079	FEVRVCACP
TP53	HLA-A-02:50	E286D	276	20.844	ACPGRDRRT
TP53	HLA-A-02:50	E286D	279	43.1662	GRDRRTEEE
TP53	HLA-A-02:50	E286D	290	32.5703	RKKGEPHHE
TP53	HLA-A-02:50	E286D	291	5.69838	KKGEPHHEL
TP53	HLA-A-02:50	E286D	292	7.10709	KGEPHHELP
TP53	HLA-A-02:50	E286D	293	14.6055	GEPHHELPP
TP53	HLA-A-02:50	E285K	269	66.082	SFEVRVCAC
TP53	HLA-A-02:50	E285K	270	8.90079	FEVRVCACP
TP53	HLA-A-02:50	E285K	276	20.844	ACPGRDRRT
TP53	HLA-A-02:50	E285K	279	43.1662	GRDRRTEEE
TP53	HLA-A-02:50	E285K	290	32.5703	RKKGEPHHE
TP53	HLA-A-02:50	E285K	291	5.69838	KKGEPHHEL
TP53	HLA-A-02:50	E285K	292	7.10709	KGEPHHELP
TP53	HLA-A-02:50	E285K	293	14.6055	GEPHHELPP
TP53	HLA-A-02:50	D281G	266	10.7041	GRNSFEVRV
TP53	HLA-A-02:50	D281G	267	71.5402	RNSFEVRVC
TP53	HLA-A-02:50	D281G	268	69.8681	NSFEVRVCA
TP53	HLA-A-02:50	D281G	269	66.082	SFEVRVCAC
TP53	HLA-A-02:50	D281G	270	8.90079	FEVRVCACP
TP53	HLA-A-02:50	D281G	276	20.844	ACPGRDRRT
TP53	HLA-A-02:50	D281G	279	43.1662	GRDRRTEEE
TP53	HLA-A-02:50	R280T	264	2.60033	LLGRNSFEV
TP53	HLA-A-02:50	R280T	266	10.7041	GRNSFEVRV
TP53	HLA-A-02:50	R280T	267	71.5402	RNSFEVRVC
TP53	HLA-A-02:50	R280T	268	69.8681	NSFEVRVCA
TP53	HLA-A-02:50	R280T	269	66.082	SFEVRVCAC
TP53	HLA-A-02:50	R280T	270	8.90079	FEVRVCACP
TP53	HLA-A-02:50	R280T	276	20.844	ACPGRDRRT
TP53	HLA-A-02:50	R280T	279	43.1662	GRDRRTEEE
TP53	HLA-A-02:50	P278L	263	19.3498	NLLGRNSFE
TP53	HLA-A-02:50	P278L	264	2.60033	LLGRNSFEV
TP53	HLA-A-02:50	P278L	266	10.7041	GRNSFEVRV
TP53	HLA-A-02:50	P278L	267	71.5402	RNSFEVRVC
TP53	HLA-A-02:50	P278L	268	69.8681	NSFEVRVCA
TP53	HLA-A-02:50	P278L	269	66.082	SFEVRVCAC
TP53	HLA-A-02:50	P278L	270	8.90079	FEVRVCACP
TP53	HLA-A-02:50	P278L	276	20.844	ACPGRDRRT
TP53	HLA-A-02:50	P278L	279	43.1662	GRDRRTEEE
TP53	HLA-A-02:50	V274F	263	19.3498	NLLGRNSFE
TP53	HLA-A-02:50	V274F	264	2.60033	LLGRNSFEV
TP53	HLA-A-02:50	V274F	266	10.7041	GRNSFEVRV
TP53	HLA-A-02:50	V274F	267	71.5402	RNSFEVRVC
TP53	HLA-A-02:50	V274F	268	69.8681	NSFEVRVCA
TP53	HLA-A-02:50	V274F	269	66.082	SFEVRVCAC
TP53	HLA-A-02:50	V274F	270	8.90079	FEVRVCACP
TP53	HLA-A-02:50	V274F	276	20.844	ACPGRDRRT
TP53	HLA-A-02:50	V274F	279	43.1662	GRDRRTEEE
TP53	HLA-A-02:50	R273L	257	28.7434	LEDSSGNLL
TP53	HLA-A-02:50	R273L	263	19.3498	NLLGRNSFE
TP53	HLA-A-02:50	R273L	264	2.60033	LLGRNSFEV
TP53	HLA-A-02:50	R273L	266	10.7041	GRNSFEVRV
TP53	HLA-A-02:50	R273L	267	71.5402	RNSFEVRVC
TP53	HLA-A-02:50	R273L	268	69.8681	NSFEVRVCA
TP53	HLA-A-02:50	R273L	269	66.082	SFEVRVCAC
TP53	HLA-A-02:50	R273L	270	8.90079	FEVRVCACP
TP53	HLA-A-02:50	R273L	276	20.844	ACPGRDRRT
TP53	HLA-A-02:50	R273L	279	43.1662	GRDRRTEEE
TP53	HLA-A-02:50	L252P	236	4.74759	YMCNSSCMG
TP53	HLA-A-02:50	L252P	237	43.3534	MCNSSCMGG
TP53	HLA-A-02:50	L252P	242	4.57911	CMGGMNRRP
TP53	HLA-A-02:50	L252P	243	26.9872	MGGMNRRPI
TP53	HLA-A-02:50	L252P	244	24.6854	GGMNRRPIL
TP53	HLA-A-02:50	L252P	245	7.09042	GMNRRPILT
TP53	HLA-A-02:50	L252P	246	33.3554	MNRRPILTI
TP53	HLA-A-02:50	L252P	247	45.8772	NRRPILTII
TP53	HLA-A-02:50	L252P	248	61.2034	RRPILTIIT
TP53	HLA-A-02:50	L252P	250	56.6553	PILTIITLE
TP53	HLA-A-02:50	L252P	251	16.3507	ILTIITLED
TP53	HLA-A-02:50	L252P	253	16.6054	TIITLEDSS
TP53	HLA-A-02:50	L252P	254	16.6546	IITLEDSSG
TP53	HLA-A-02:50	L252P	256	11.7954	TLEDSSGNL
TP53	HLA-A-02:50	L252P	257	28.7434	LEDSSGNLL
TP53	HLA-A-02:50	R249M	233	20.5547	HYNYMCNSS
TP53	HLA-A-02:50	R249M	234	25.7186	YNYMCNSSC
TP53	HLA-A-02:50	R249M	236	4.74759	YMCNSSCMG
TP53	HLA-A-02:50	R249M	237	43.3534	MCNSSCMGG
TP53	HLA-A-02:50	R249M	242	4.57911	CMGGMNRRP
TP53	HLA-A-02:50	R249M	243	26.9872	MGGMNRRPI
TP53	HLA-A-02:50	R249M	244	24.6854	GGMNRRPIL
TP53	HLA-A-02:50	R249M	245	7.09042	GMNRRPILT
TP53	HLA-A-02:50	R249M	246	33.3554	MNRRPILTI
TP53	HLA-A-02:50	R249M	247	45.8772	NRRPILTII
TP53	HLA-A-02:50	R249M	248	61.2034	RRPILTIIT
TP53	HLA-A-02:50	R249M	250	56.6553	PILTIITLE
TP53	HLA-A-02:50	R249M	251	16.3507	ILTIITLED
TP53	HLA-A-02:50	R249M	253	16.6054	TIITLEDSS
TP53	HLA-A-02:50	R249M	254	16.6546	IITLEDSSG
TP53	HLA-A-02:50	R249M	256	11.7954	TLEDSSGNL
TP53	HLA-A-02:50	R249M	257	28.7434	LEDSSGNLL
TP53	HLA-A-02:50	G245V	231	48.1402	TIHYNYMCN
TP53	HLA-A-02:50	G245V	232	16.2763	IHYNYMCNS
TP53	HLA-A-02:50	G245V	233	20.5547	HYNYMCNSS
TP53	HLA-A-02:50	G245V	234	25.7186	YNYMCNSSC
TP53	HLA-A-02:50	G245V	236	4.74759	YMCNSSCMG
TP53	HLA-A-02:50	G245V	237	43.3534	MCNSSCMGG
TP53	HLA-A-02:50	G245V	242	4.57911	CMGGMNRRP
TP53	HLA-A-02:50	G245V	243	26.9872	MGGMNRRPI
TP53	HLA-A-02:50	G245V	244	24.6854	GGMNRRPIL
TP53	HLA-A-02:50	G245V	245	7.09042	GMNRRPILT
TP53	HLA-A-02:50	G245V	246	33.3554	MNRRPILTI
TP53	HLA-A-02:50	G245V	247	45.8772	NRRPILTII
TP53	HLA-A-02:50	G245V	248	61.2034	RRPILTIIT
TP53	HLA-A-02:50	G245V	250	56.6553	PILTIITLE
TP53	HLA-A-02:50	G245V	251	16.3507	ILTIITLED
TP53	HLA-A-02:50	G245V	253	16.6054	TIITLEDSS
TP53	HLA-A-02:50	C242F	231	48.1402	TIHYNYMCN
TP53	HLA-A-02:50	C242F	232	16.2763	IHYNYMCNS
TP53	HLA-A-02:50	C242F	233	20.5547	HYNYMCNSS
TP53	HLA-A-02:50	C242F	234	25.7186	YNYMCNSSC
TP53	HLA-A-02:50	C242F	236	4.74759	YMCNSSCMG
TP53	HLA-A-02:50	C242F	237	43.3534	MCNSSCMGG
TP53	HLA-A-02:50	C242F	242	4.57911	CMGGMNRRP
TP53	HLA-A-02:50	C242F	243	26.9872	MGGMNRRPI
TP53	HLA-A-02:50	C242F	244	24.6854	GGMNRRPIL
TP53	HLA-A-02:50	C242F	245	7.09042	GMNRRPILT
TP53	HLA-A-02:50	C242F	246	33.3554	MNRRPILTI
TP53	HLA-A-02:50	C242F	247	45.8772	NRRPILTII
TP53	HLA-A-02:50	C242F	248	61.2034	RRPILTIIT
TP53	HLA-A-02:50	C242F	250	56.6553	PILTIITLE
TP53	HLA-A-02:50	S215I	199	54.2139	GNLRVEYLD
TP53	HLA-A-02:50	S215I	200	46.2106	NLRVEYLDD
TP53	HLA-A-02:50	S215I	203	62.3849	VEYLDDRNT
TP53	HLA-A-02:50	S215I	208	59.6459	DRNTFRHSV
TP53	HLA-A-02:50	S215I	209	15.7088	RNTFRHSVV
TP53	HLA-A-02:50	S215I	210	83.5177	NTFRHSVVV
TP53	HLA-A-02:50	S215I	211	13.8525	TFRHSVVVP
TP53	HLA-A-02:50	S215I	213	65.4347	RHSVVVPYE
TP53	HLA-A-02:50	S215I	214	33.1157	HSVVVPYEP
TP53	HLA-A-02:50	S215I	215	35.6933	SVVVPYEPP
TP53	HLA-A-02:50	S215I	216	65.7015	VVVPYEPPE
TP53	HLA-A-02:50	S215I	217	11.6405	VVPYEPPEV
TP53	HLA-A-02:50	S215I	220	35.4058	YEPPEVGSD
TP53	HLA-A-02:50	Y205C	189	12.8147	APPQHLIRV
TP53	HLA-A-02:50	Y205C	193	11.8902	HLIRVEGNL
TP53	HLA-A-02:50	Y205C	195	7.56805	IRVEGNLRV
TP53	HLA-A-02:50	Y205C	196	62.1414	RVEGNLRVE
TP53	HLA-A-02:50	Y205C	199	54.2139	GNLRVEYLD
TP53	HLA-A-02:50	Y205C	200	46.2106	NLRVEYLDD
TP53	HLA-A-02:50	Y205C	203	62.3849	VEYLDDRNT
TP53	HLA-A-02:50	Y205C	208	59.6459	DRNTFRHSV
TP53	HLA-A-02:50	Y205C	209	15.7088	RNTFRHSVV
TP53	HLA-A-02:50	Y205C	210	83.5177	NTFRHSVVV
TP53	HLA-A-02:50	Y205C	211	13.8525	TFRHSVVVP
TP53	HLA-A-02:50	Y205C	213	65.4347	RHSVVVPYE
TP53	HLA-A-02:50	H193R	178	72.5412	HHERCSDSD
TP53	HLA-A-02:50	H193R	181	21.4905	RCSDSDGLA
TP53	HLA-A-02:50	H193R	182	63.368	CSDSDGLAP
TP53	HLA-A-02:50	H193R	183	30.0989	SDSDGLAPP
TP53	HLA-A-02:50	H193R	187	4.53566	GLAPPQHLI
TP53	HLA-A-02:50	H193R	189	12.8147	APPQHLIRV
TP53	HLA-A-02:50	H193R	193	11.8902	HLIRVEGNL
TP53	HLA-A-02:50	H193R	195	7.56805	IRVEGNLRV
TP53	HLA-A-02:50	H193R	196	62.1414	RVEGNLRVE
TP53	HLA-A-02:50	H193R	199	54.2139	GNLRVEYLD
TP53	HLA-A-02:50	H193R	200	46.2106	NLRVEYLDD
TP53	HLA-A-02:50	H168R	157	51.7988	VRAMAIYKQ
TP53	HLA-A-02:50	H168R	159	6.79154	AMAIYKQSQ
TP53	HLA-A-02:50	H168R	161	79.1965	AIYKQSQHM
TP53	HLA-A-02:50	H168R	162	6.4956	IYKQSQHMT
TP53	HLA-A-02:50	H168R	163	14.4149	YKQSQHMTE
TP53	HLA-A-02:50	H168R	164	4.50555	KQSQHMTEV
TP53	HLA-A-02:50	H168R	165	54.4157	QSQHMTEVV
TP53	HLA-A-02:50	H168R	168	17.6091	HMTEVVRRC
TP53	HLA-A-02:50	H168R	169	56.0358	MTEVVRRCP
TP53	HLA-A-02:50	H168R	172	51.6098	VVRRCPHHE
TP53	HLA-A-02:50	H168R	175	61.6735	RCPHHERCS
TP53	HLA-A-02:50	Q165*	149	99.9269	STPPPGTRV
TP53	HLA-A-02:50	Q165*	157	51.7988	VRAMAIYKQ
TP53	HLA-A-02:50	Q165*	159	6.79154	AMAIYKQSQ
TP53	HLA-A-02:50	Q165*	161	79.1965	AIYKQSQHM
TP53	HLA-A-02:50	Q165*	162	6.4956	IYKQSQHMT
TP53	HLA-A-02:50	Q165*	163	14.4149	YKQSQHMTE
TP53	HLA-A-02:50	Q165*	164	4.50555	KQSQHMTEV
TP53	HLA-A-02:50	Q165*	165	54.4157	QSQHMTEVV
TP53	HLA-A-02:50	Q165*	168	17.6091	HMTEVVRRC
TP53	HLA-A-02:50	Q165*	169	56.0358	MTEVVRRCP
TP53	HLA-A-02:50	Q165*	172	51.6098	VVRRCPHHE
TP53	HLA-A-02:50	R158L	142	78.1555	PVQLWVDST
TP53	HLA-A-02:50	R158L	143	33.6	VQLWVDSTP
TP53	HLA-A-02:50	R158L	144	24.247	QLWVDSTPP
TP53	HLA-A-02:50	R158L	145	12.4381	LWVDSTPPP
TP53	HLA-A-02:50	R158L	146	38.9382	WVDSTPPPG
TP53	HLA-A-02:50	R158L	147	56.3712	VDSTPPPGT
TP53	HLA-A-02:50	R158L	149	99.9269	STPPPGTRV
TP53	HLA-A-02:50	R158L	157	51.7988	VRAMAIYKQ
TP53	HLA-A-02:50	R158L	159	6.79154	AMAIYKQSQ
TP53	HLA-A-02:50	R158L	161	79.1965	AIYKQSQHM
TP53	HLA-A-02:50	R158L	162	6.4956	IYKQSQHMT
TP53	HLA-A-02:50	R158L	163	14.4149	YKQSQHMTE
TP53	HLA-A-02:50	R158L	164	4.50555	KQSQHMTEV
TP53	HLA-A-02:50	R158L	165	54.4157	QSQHMTEVV
TP53	HLA-A-02:50	V157F	142	78.1555	PVQLWVDST
TP53	HLA-A-02:50	V157F	143	33.6	VQLWVDSTP
TP53	HLA-A-02:50	V157F	144	24.247	QLWVDSTPP
TP53	HLA-A-02:50	V157F	145	12.4381	LWVDSTPPP
TP53	HLA-A-02:50	V157F	146	38.9382	WVDSTPPPG
TP53	HLA-A-02:50	V157F	147	56.3712	VDSTPPPGT
TP53	HLA-A-02:50	V157F	149	99.9269	STPPPGTRV
TP53	HLA-A-02:50	V157F	157	51.7988	VRAMAIYKQ
TP53	HLA-A-02:50	V157F	159	6.79154	AMAIYKQSQ
TP53	HLA-A-02:50	V157F	161	79.1965	AIYKQSQHM
TP53	HLA-A-02:50	V157F	162	6.4956	IYKQSQHMT
TP53	HLA-A-02:50	V157F	163	14.4149	YKQSQHMTE
TP53	HLA-A-02:50	V157F	164	4.50555	KQSQHMTEV
TP53	HLA-A-02:50	V157F	165	54.4157	QSQHMTEVV
TP53	HLA-A-02:50	Q104*	88	32.8699	APSWPLSSS
TP53	HLA-A-02:50	Q104*	90	24.9749	SWPLSSSVP
TP53	HLA-A-02:50	Q104*	91	69.2531	WPLSSSVPS
TP53	HLA-A-02:50	Q104*	92	56.1986	PLSSSVPSQ
TP53	HLA-A-02:50	Q104*	103	8.10096	YQGSYGFRL
TP53	HLA-A-02:50	Q104*	106	26.5749	SYGFRLGFL
TP53	HLA-A-02:50	Q104*	108	24.0042	GFRLGFLHS
TP53	HLA-A-02:50	Q104*	109	13.4859	FRLGFLHSG
TP53	HLA-A-02:50	Q104*	110	10.2517	RLGFLHSGT
TP53	HLA-A-02:50	Q104*	111	44.3224	LGFLHSGTA
TP53	HLA-A-02:50	S99F	84	14.1762	APAPAPSWP
TP53	HLA-A-02:50	S99F	86	33.4646	APAPSWPLS
TP53	HLA-A-02:50	S99F	88	32.8699	APSWPLSSS
TP53	HLA-A-02:50	S99F	90	24.9749	SWPLSSSVP
TP53	HLA-A-02:50	S99F	91	69.2531	WPLSSSVPS
TP53	HLA-A-02:50	S99F	92	56.1986	PLSSSVPSQ
TP53	HLA-A-02:50	S99F	103	8.10096	YQGSYGFRL
TP53	HLA-A-02:50	S99F	106	26.5749	SYGFRLGFL
TP53	HLA-A-02:50	E68K	52	61.9154	QWFTEDPGP
TP53	HLA-A-02:50	E68K	53	16.9263	WFTEDPGPD
TP53	HLA-A-02:50	E68K	54	58.6267	FTEDPGPDE
TP53	HLA-A-02:50	E68K	55	16.7663	TEDPGPDEA
TP53	HLA-A-02:50	E68K	59	33.8227	GPDEAPRMP
TP53	HLA-A-02:50	E68K	63	33.8453	APRMPEAAP
TP53	HLA-A-02:50	E68K	64	94.6536	PRMPEAAPP
TP53	HLA-A-02:50	E68K	65	3.65118	RMPEAAPPV
TP53	HLA-A-02:50	E68K	66	26.4135	MPEAAPPVA
TP53	HLA-A-02:50	E68K	69	21.1176	AAPPVAPAP
TP53	HLA-A-02:50	E68K	70	25.1357	APPVAPAPA
TP53	HLA-A-02:50	E68K	74	16.5511	APAPAAPTP
TP53	HLA-A-02:50	E68K	76	24.9095	APAAPTPAA
NOTCH1	HLA-A-02:50	L1600R	1585	22.3805	LRNSSFHFL
NOTCH1	HLA-A-02:50	L1600R	1588	80.6558	SSFHFLREL
NOTCH1	HLA-A-02:50	L1600R	1589	21.7677	SFHFLRELS
NOTCH1	HLA-A-02:50	L1600R	1591	6.31873	HFLRELSRV
NOTCH1	HLA-A-02:50	L1600R	1592	1.98569	FLRELSRVL
NOTCH1	HLA-A-02:50	L1600R	1594	62.2423	RELSRVLHT
NOTCH1	HLA-A-02:50	L1600R	1596	35.4294	LSRVLHTNV
NOTCH1	HLA-A-02:50	L1600R	1597	16.7733	SRVLHTNVV
NOTCH1	HLA-A-02:50	L1600R	1602	34.2066	TNVVFKRDA
NOTCH1	HLA-A-02:50	L1600R	1605	28.7582	VFKRDAHGQ
NOTCH1	HLA-A-02:50	L1600R	1606	12.4263	FKRDAHGQQ
NOTCH1	HLA-A-02:50	L1600R	1608	50.1371	RDAHGQQMI
FGFR1	HLA-A-02:50	P146A	136	44.746	SEEKETDNT
FGFR1	HLA-A-02:50	P146A	139	42.0323	KETDNTKPN
FGFR1	HLA-A-02:50	P146A	141	21.7604	TDNTKPNPV
FGFR1	HLA-A-02:50	P146A	146	87.8978	PNPVAPYWT
FGFR1	HLA-A-02:50	P146A	148	81.9208	PVAPYWTSP
FGFR1	HLA-A-02:50	P146A	149	87.364	VAPYWTSPE
FGFR1	HLA-A-02:50	P146A	152	15.6442	YWTSPEKME
MET	HLA-A-03:01	V1237I	1232	87.636	KEYYSVHNK
TP53	HLA-A-03:01	H168R	156	15.9659	RVRAMAIYK
TP53	HLA-A-03:01	Q165*	156	15.9659	RVRAMAIYK
TP53	HLA-A-03:01	R158L	156	15.9659	RVRAMAIYK
TP53	HLA-A-03:01	V157F	156	15.9659	RVRAMAIYK
NOTCH1	HLA-A-03:01	L1600R	1599	54.1065	VLHTNVVFK
BRAF	HLA-A-11:01	G466A	465	66.4384	SGSFGTVYK
EGFR	HLA-A-11:01	T710I	705	72.1935	RILKETEFK
ERBB4	HLA-A-11:01	P594L	598	84.8655	QGANSFIFK
FGFR3	HLA-A-11:01	G370S	371	47.8347	SVYAGILSY
FGFR3	HLA-A-11:01	S371N	371	47.8347	SVYAGILSY
FGFR3	HLA-A-11:01	F384L	371	47.8347	SVYAGILSY
FGFR3	HLA-A-11:01	F384L	389	90.8824	VVAAVTLCR
KRAS	HLA-A-11:01	G12V	8	87.3751	VVGAGGVGK
KRAS	HLA-A-11:01	G12C	8	87.3751	VVGAGGVGK
MET	HLA-A-11:01	N375S	360	26.1041	SAMCAFPIK
MET	HLA-A-11:01	V1237I	1236	41.0665	SVHNKTGAK
MET	HLA-A-11:01	V1237I	1240	60.9228	KTGAKLPVK
PIK3CA	HLA-A-11:01	E707K	712	78.5362	LINLTDILK
TP53	HLA-A-11:01	H168R	156	19.9344	RVRAMAIYK
TP53	HLA-A-11:01	Q165*	156	19.9344	RVRAMAIYK
TP53	HLA-A-11:01	R158L	156	19.9344	RVRAMAIYK
TP53	HLA-A-11:01	V157F	156	19.9344	RVRAMAIYK
TP53	HLA-A-11:01	Q104*	93	90.4563	LSSSVPSQK
TP53	HLA-A-11:01	S99F	93	90.4563	LSSSVPSQK
NOTCH1	HLA-A-11:01	L1600R	1599	90.7007	VLHTNVVFK
FGFR2	HLA-A-24:02	V395A	380	21.2526	IYCIGVFLI
FGFR3	HLA-A-24:02	G370S	378	14.2424	SYGVGFFLF
FGFR3	HLA-A-24:02	S371N	378	14.2424	SYGVGFFLF
FGFR3	HLA-A-24:02	F384L	378	14.2424	SYGVGFFLF
AKT1	HLA-A-24:03	W22C	21	82.6961	TWRPRYFLL
AKT1	HLA-A-24:03	W22C	25	78.7365	RYFLLKNDG
AKT1	HLA-A-24:03	E17L	21	82.6961	TWRPRYFLL
AKT1	HLA-A-24:03	E17L	25	78.7365	RYFLLKNDG
DDR2	HLA-A-24:03	W771*	763	58.4496	KFTTASDVW
DDR2	HLA-A-24:03	W771*	770	84.2269	VWAFGVTLW
EGFR	HLA-A-24:03	G873R	879	39.9318	KWMALESIL
FGFR2	HLA-A-24:03	V395A	380	50.8711	IYCIGVFLI
FGFR2	HLA-A-24:03	S299N	300	94.5598	KYGPDGLPY
FGFR2	HLA-A-24:03	E275K	280	76.5303	VYSDAQPHI
FGFR3	HLA-A-24:03	G370S	378	1.01547	SYGVGFFLF
FGFR3	HLA-A-24:03	S371N	378	1.01547	SYGVGFFLF
FGFR3	HLA-A-24:03	F384L	378	1.01547	SYGVGFFLF
MET	HLA-A-24:03	V1237I	1229	67.7317	MYDKEYYSV
PTEN	HLA-A-24:03	P404L	412	40.886	MYFEFPQPL
SMAD4	HLA-A-24:03	P312L	300	5.77369	HYWPVHNEL
SMAD4	HLA-A-24:03	A327V	321	24.5836	EYWCSIAYF
SMAD4	HLA-A-24:03	A406V	400	81.5629	RCLSDHAVF
STK11	HLA-A-24:03	G52R	59	14.0537	SYGKVKEVL
TP53	HLA-A-24:03	R249M	235	22.7566	NYMCNSSCM
TP53	HLA-A-24:03	G245V	235	22.7566	NYMCNSSCM
TP53	HLA-A-24:03	C242F	235	22.7566	NYMCNSSCM
TP53	HLA-A-24:03	S215I	204	16.1063	EYLDDRNTF
TP53	HLA-A-24:03	Y205C	204	16.1063	EYLDDRNTF
TP53	HLA-A-24:03	Q104*	106	30.7401	SYGFRLGFL
TP53	HLA-A-24:03	S99F	106	30.7401	SYGFRLGFL
EGFR	HLA-A-26:03	V769A	758	94.1641	EILDEAYVM
ERBB4	HLA-A-26:03	G338D	335	46.092	DGIGTGSLM
PIK3CA	HLA-A-26:03	M697T	689	37.4627	ESYCRACGM
STK11	HLA-A-26:03	P326S	327	19.0499	DTKDRWRSM
AKT1	HLA-A-30:01	W22C	6	12.9317	IVKEGWLHK
AKT1	HLA-A-30:01	W22C	12	90.6265	LHKRGEYIK
AKT1	HLA-A-30:01	W22C	20	46.0373	KTWRPRYFL
AKT1	HLA-A-30:01	E17L	6	12.9317	IVKEGWLHK
AKT1	HLA-A-30:01	E17L	12	90.6265	LHKRGEYIK
AKT1	HLA-A-30:01	E17L	20	46.0373	KTWRPRYFL
BRAF	HLA-A-30:01	G466A	473	75.1035	KGKWHGDVA
EGFR	HLA-A-30:01	T710I	705	33.6781	RILKETEFK
EGFR	HLA-A-30:01	T710I	714	40.0554	KIKVLGSGA
EGFR	HLA-A-30:01	T710I	716	89.0106	KVLGSGAFG
EGFR	HLA-A-30:01	R748T	737	2.70334	KVKIPVAIK
EGFR	HLA-A-30:01	p.746_750delA	737	2.70334	KVKIPVAIK
FBXW7	HLA-A-30:01	R505G	495	82.6437	HVLMGHVAA
FBXW7	HLA-A-30:01	R505G	503	56.7139	AVRCVQYDG
FBXW7	HLA-A-30:01	V485I	477	88.7418	GSRDATLRV
FGFR2	HLA-A-30:01	V395A	397	65.5814	LCRMKNTTK
MET	HLA-A-30:01	N375S	360	29.4368	SAMCAFPIK
MET	HLA-A-30:01	N375S	368	84.4646	KYVNDFFNK
MET	HLA-A-30:01	V1237I	1236	33.2537	SVHNKTGAK
MET	HLA-A-30:01	V1237I	1240	10.6642	KTGAKLPVK
PTEN	HLA-A-30:01	P404L	394	45.761	KVKIYSSNS
SMAD4	HLA-A-30:01	A406V	398	92.6517	WVRCLSDHA
STK11	HLA-A-30:01	G52R	40	2.72551	RKRAKLIGK
STK11	HLA-A-30:01	G52R	42	65.3754	RAKLIGKYL
STK11	HLA-A-30:01	P326S	310	41.9647	RKKHPPAEA
STK11	HLA-A-30:01	P326S	329	79.2708	KDRWRSMTV
STK11	HLA-A-30:01	P326S	333	54.9501	RSMTVVPYL
TP53	HLA-A-30:01	E298*	283	98.8904	RTEEENLRK
TP53	HLA-A-30:01	E287*	283	98.8904	RTEEENLRK
TP53	HLA-A-30:01	E286D	283	98.8904	RTEEENLRK
TP53	HLA-A-30:01	E285K	283	98.8904	RTEEENLRK
TP53	HLA-A-30:01	D281G	283	98.8904	RTEEENLRK
TP53	HLA-A-30:01	R280T	283	98.8904	RTEEENLRK
TP53	HLA-A-30:01	P278L	283	98.8904	RTEEENLRK
TP53	HLA-A-30:01	H168R	154	53.3407	GTRVRAMAI
TP53	HLA-A-30:01	H168R	156	0.349607	RVRAMAIYK
TP53	HLA-A-30:01	Q165*	154	53.3407	GTRVRAMAI
TP53	HLA-A-30:01	Q165*	156	0.349607	RVRAMAIYK
TP53	HLA-A-30:01	R158L	154	53.3407	GTRVRAMAI
TP53	HLA-A-30:01	R158L	156	0.349607	RVRAMAIYK
TP53	HLA-A-30:01	V157F	154	53.3407	GTRVRAMAI
TP53	HLA-A-30:01	V157F	156	0.349607	RVRAMAIYK
NOTCH1	HLA-A-30:01	L1600R	1599	92.9542	VLHTNVVFK
AKT1	HLA-A-30:02	W22C	10	62.6703	GWLHKRGEY
AKT1	HLA-A-30:02	W22C	18	52.7669	YIKTWRPRY
AKT1	HLA-A-30:02	E17L	10	62.6703	GWLHKRGEY
AKT1	HLA-A-30:02	E17L	18	52.7669	YIKTWRPRY
ERBB4	HLA-A-30:02	P594L	599	56.3636	GANSFIFKY
MET	HLA-A-30:02	N375S	361	92.1597	AMCAFPIKY
MET	HLA-A-30:02	N375S	382	65.0133	NVRCLQHFY
PIK3CA	HLA-A-30:02	M697T	690	83.6908	SYCRACGMY
SMAD4	HLA-A-30:02	P312L	314	32.5093	ISNHPAPEY
SMAD4	HLA-A-30:02	A327V	314	32.5093	ISNHPAPEY
STK11	HLA-A-30:02	G52R	41	80.2039	KRAKLIGKY
TP53	HLA-A-30:02	Q104*	99	32.5334	SQKTYQGSY
TP53	HLA-A-30:02	S99F	99	32.5334	SQKTYQGSY
AKT1	HLA-A-31:01	W22C	15	52.5103	RGEYIKTWR
AKT1	HLA-A-31:01	W22C	20	57.5996	KTWRPRYFL
AKT1	HLA-A-31:01	E17L	15	52.5103	RGEYIKTWR
AKT1	HLA-A-31:01	E17L	20	57.5996	KTWRPRYFL
EGFR	HLA-A-31:01	G873R	881	47.0414	MALESILHR
FBXW7	HLA-A-31:01	R505G	497	69.3128	LMGHVAAVR
FGFR2	HLA-A-31:01	V395A	391	61.7755	MVVTVILCR
KRAS	HLA-A-31:01	Q61H	65	49.0046	SAMRDQYMR
MET	HLA-A-31:01	N375S	368	53.3837	KYVNDFFNK
MET	HLA-A-31:01	N375S	376	68.0191	KIVNKNNVR
PIK3CA	HLA-A-31:01	M697T	696	26.0567	GMYLKHLNR
PIK3CA	HLA-A-31:01	E707K	696	26.0567	GMYLKHLNR
PTEN	HLA-A-31:01	S168N	162	18.6796	LSSFFFSHR
PTEN	HLA-A-31:01	M174V	162	18.6796	LSSFFFSHR
PTEN	HLA-A-31:01	P404L	399	90.2459	SSNSGPTRR
TP53	HLA-A-31:01	L252P	240	73.8897	SSCMGGMNR
TP53	HLA-A-31:01	R249M	240	73.8897	SSCMGGMNR
TP53	HLA-A-31:01	G245V	240	73.8897	SSCMGGMNR
TP53	HLA-A-31:01	C242F	240	73.8897	SSCMGGMNR
TP53	HLA-A-31:01	H168R	156	80.9638	RVRAMAIYK
TP53	HLA-A-31:01	H168R	166	92.5645	SQHMTEVVR
TP53	HLA-A-31:01	Q165*	156	80.9638	RVRAMAIYK
TP53	HLA-A-31:01	Q165*	166	92.5645	SQHMTEVVR
TP53	HLA-A-31:01	R158L	156	80.9638	RVRAMAIYK
TP53	HLA-A-31:01	R158L	166	92.5645	SQHMTEVVR
TP53	HLA-A-31:01	V157F	156	80.9638	RVRAMAIYK
TP53	HLA-A-31:01	Q104*	102	40.9848	TYQGSYGFR
TP53	HLA-A-31:01	S99F	102	40.9848	TYQGSYGFR
NOTCH1	HLA-A-31:01	L1600R	1586	5.11011	RNSSFHFLR
AKT1	HLA-A-32:01	W22C	20	39.6788	KTWRPRYFL
AKT1	HLA-A-32:01	E17L	20	39.6788	KTWRPRYFL
DDR2	HLA-A-32:01	W771*	775	22.9068	VTLWETFTF
EGFR	HLA-A-32:01	V769A	776	24.4039	RLLGICLTS
FBXW7	HLA-A-32:01	R505G	513	12.4912	RVVSGAYDF
MET	HLA-A-32:01	N375S	359	24.385	RSAMCAFPI
PIK3CA	HLA-A-32:01	E707K	711	50.0282	KLINLTDIL
PTEN	HLA-A-32:01	S168N	163	61.5344	SSFFFSHRL
PTEN	HLA-A-32:01	S168N	170	27.6018	RLPDMTAII
PTEN	HLA-A-32:01	M174V	163	61.5344	SSFFFSHRL
PTEN	HLA-A-32:01	M174V	170	27.6018	RLPDMTAII
SMAD4	HLA-A-32:01	A202T	199	87.6403	ALLAPSESN
SMAD4	HLA-A-32:01	A406V	406	67.082	AVFVQSYYL
TP53	HLA-A-32:01	Q104*	101	2.04661	KTYQGSYGF
TP53	HLA-A-32:01	S99F	101	2.04661	KTYQGSYGF
NOTCH1	HLA-A-32:01	L1600R	1598	3.97248	RVLHTNVVF
DDR2	HLA-A-68:01	W771*	779	93.2301	ETFTFCQEQ
EGFR	HLA-A-68:01	T710I	697	26.6816	EAPNQALLR
EGFR	HLA-A-68:01	R748T	740	45.2183	IPVAIKELR
EGFR	HLA-A-68:01	R748T	749	20.8692	EATSPKANK
EGFR	HLA-A-68:01	G873R	881	32.824	MALESILHR
EGFR	HLA-A-68:01	p.746_750delA	740	45.2183	IPVAIKELR
EGFR	HLA-A-68:01	p.746_750delA	749	20.8692	EATSPKANK
FGFR2	HLA-A-68:01	V395A	391	6.27173	MVVTVILCR
FGFR2	HLA-A-68:01	A362A	357	92.1199	LTVLPAPGR
FGFR3	HLA-A-68:01	F384L	389	31.1727	VVAAVTLCR
KRAS	HLA-A-68:01	Q61H	65	38.3647	SAMRDQYMR
KRAS	HLA-A-68:01	D47V	33	33.6574	DPTIEDSYR
KRAS	HLA-A-68:01	R41S	33	33.6574	DPTIEDSYR
MAP2K1	HLA-A-68:01	D67Y	51	13.6214	EAFLTQKQK
MAP2K1	HLA-A-68:01	D67Y	62	70.2011	ELKDDDFEK
MET	HLA-A-68:01	N375S	372	90.7389	DFFNKIVNK
PTEN	HLA-A-68:01	S168N	162	17.5922	LSSFFFSHR
PTEN	HLA-A-68:01	M174V	162	17.5922	LSSFFFSHR
PTEN	HLA-A-68:01	M174V	180	40.3345	EIVSRNKRR
PTEN	HLA-A-68:01	P404L	398	77.215	YSSNSGPTR
SMAD4	HLA-A-68:01	A406V	405	61.2038	HAVFVQSYY
TP53	HLA-A-68:01	E339*	343	49.563	ELNEALELK
TP53	HLA-A-68:01	E287*	275	73.8552	CACPGRDRR
TP53	HLA-A-68:01	E286D	275	73.8552	CACPGRDRR
TP53	HLA-A-68:01	E285K	275	73.8552	CACPGRDRR
TP53	HLA-A-68:01	D281G	275	73.8552	CACPGRDRR
TP53	HLA-A-68:01	R280T	275	73.8552	CACPGRDRR
TP53	HLA-A-68:01	P278L	275	73.8552	CACPGRDRR
TP53	HLA-A-68:01	V274F	259	48.7593	DSSGNLLGR
TP53	HLA-A-68:01	V274F	275	73.8552	CACPGRDRR
TP53	HLA-A-68:01	R273L	259	48.7593	DSSGNLLGR
TP53	HLA-A-68:01	R273L	275	73.8552	CACPGRDRR
TP53	HLA-A-68:01	L252P	259	48.7593	DSSGNLLGR
NOTCH1	HLA-A-68:01	L1600R	1586	78.5731	RNSSFHFLR
FGFR1	HLA-A-68:01	P146A	153	68.9189	WTSPEKMEK
DDR2	HLA-A-68:02	L94F	92	38.874	HTLHFITLV
EGFR	HLA-A-68:02	V769A	761	96.0414	DEAYVMASV
FGFR2	HLA-A-68:02	A362A	346	93.3448	NSIGISFHS
KRAS	HLA-A-68:02	G12V	1	77.0956	MTEYKLVVV
KRAS	HLA-A-68:02	G12C	1	77.0956	MTEYKLVVV
MET	HLA-A-68:02	N375S	362	27.4534	MCAFPIKYV
MET	HLA-A-68:02	N375S	369	57.1298	YVNDFFNKI
PTEN	HLA-A-68:02	S168N	174	7.22969	MTAIIKEIV
PTEN	HLA-A-68:02	M174V	174	7.22969	MTAIIKEIV
SMAD4	HLA-A-68:02	P186L	193	89.7845	ETYSTPALL
SMAD4	HLA-A-68:02	A202T	193	89.7845	ETYSTPALL
SMAD4	HLA-A-68:02	A327V	325	98.8952	SIAYFEMDV
TP53	HLA-A-68:02	D281G	268	67.1235	NSFEVRVCA
TP53	HLA-A-68:02	R280T	268	67.1235	NSFEVRVCA
TP53	HLA-A-68:02	P278L	268	67.1235	NSFEVRVCA
TP53	HLA-A-68:02	V274F	268	67.1235	NSFEVRVCA
TP53	HLA-A-68:02	R273L	268	67.1235	NSFEVRVCA
TP53	HLA-A-68:02	S215I	210	27.9629	NTFRHSVVV
TP53	HLA-A-68:02	Y205C	210	27.9629	NTFRHSVVV
TP53	HLA-A-68:02	E68K	68	17.9431	EAAPPVAPA
DDR2	HLA-A-69:01	L94F	92	20.4577	HTLHFITLV
KRAS	HLA-A-69:01	R41S	28	86.6089	FVDEYDPTI
MET	HLA-A-69:01	N375S	369	65.0409	YVNDFFNKI
PIK3CA	HLA-A-69:01	E707K	707	31.4206	EAMEKLINL
SMAD4	HLA-A-69:01	P186L	193	45.6455	ETYSTPALL
SMAD4	HLA-A-69:01	A202T	193	45.6455	ETYSTPALL
TP53	HLA-A-69:01	S215I	210	71.1096	NTFRHSVVV
TP53	HLA-A-69:01	Y205C	210	71.1096	NTFRHSVVV
TP53	HLA-A-69:01	E68K	68	59.8749	EAAPPVAPA
FGFR2	HLA-A-80:01	S299N	300	49.2623	KYGPDGLPY
FGFR3	HLA-A-80:01	G370S	371	3.7062	SVYAGILSY
FGFR3	HLA-A-80:01	S371N	371	3.7062	SVYAGILSY
FGFR3	HLA-A-80:01	F384L	371	3.7062	SVYAGILSY
MET	HLA-A-80:01	N375S	361	50.1047	AMCAFPIKY
MET	HLA-A-80:01	N375S	382	43.192	NVRCLQHFY
STK11	HLA-A-80:01	L282R	284	12.3969	DLLKGMLEY
STK11	HLA-A-80:01	D284F	284	12.3969	DLLKGMLEY
FGFR2	HLA-B-07:02	E275K	262	42.8687	LPANASTVV
FGFR2	HLA-B-07:02	A266T	262	42.8687	LPANASTVV
FGFR3	HLA-B-07:02	R252W	259	14.8106	LPANQTAVL
STK11	HLA-B-07:02	G52R	37	13.0514	QPRRKRAKL
STK11	HLA-B-07:02	G270E	274	38.6754	IPGDCGPPL
STK11	HLA-B-07:02	L282R	274	38.6754	IPGDCGPPL
STK11	HLA-B-07:02	D284F	274	38.6754	IPGDCGPPL
TP53	HLA-B-07:02	L252P	249	40.732	RPILTIITL
TP53	HLA-B-07:02	R249M	249	40.732	RPILTIITL
TP53	HLA-B-07:02	G245V	249	40.732	RPILTIITL
TP53	HLA-B-07:02	C242F	249	40.732	RPILTIITL
TP53	HLA-B-07:02	E68K	76	38.6691	APAAPTPAA
STK11	HLA-B-08:01	G52R	37	45.4021	QPRRKRAKL
BRAF	HLA-B-15:01	G466A	460	22.7252	GQRIGSGSF
ERBB4	HLA-B-15:01	P594L	597	52.4427	LQGANSFIF
FGFR3	HLA-B-15:01	G370S	371	32.8736	SVYAGILSY
FGFR3	HLA-B-15:01	S371N	371	32.8736	SVYAGILSY
FGFR3	HLA-B-15:01	F384L	371	32.8736	SVYAGILSY
TP53	HLA-B-15:01	E339*	330	62.4201	LQIRGRERF
TP53	HLA-B-15:01	R333C	330	62.4201	LQIRGRERF
TP53	HLA-B-15:01	Q104*	99	32.9995	SQKTYQGSY
TP53	HLA-B-15:01	S99F	99	32.9995	SQKTYQGSY
NOTCH1	HLA-B-15:01	L1600R	1584	33.563	QLRNSSFHF
AKT1	HLA-B-15:02	W22C	27	22.3328	FLLKNDGTF
BRAF	HLA-B-15:02	K601E	589	84.7972	TVKIGDFGL
BRAF	HLA-B-15:02	K601E	602	82.3839	SRWSGSHQF
BRAF	HLA-B-15:02	V590I	589	84.7972	TVKIGDFGL
BRAF	HLA-B-15:02	G466A	460	99.2254	GQRIGSGSF
DDR2	HLA-B-15:02	L94F	86	26.3836	FLQIDLHTL
DDR2	HLA-B-15:02	W771*	773	76.8503	FGVTLWETF
EGFR	HLA-B-15:02	T710I	695	16.4191	SGEAPNQAL
EGFR	HLA-B-15:02	T710I	696	87.1819	GEAPNQALL
EGFR	HLA-B-15:02	T710I	715	44.0447	IKVLGSGAF
EGFR	HLA-B-15:02	R748T	756	93.883	NKEILDEAY
EGFR	HLA-B-15:02	V769A	756	93.883	NKEILDEAY
EGFR	HLA-B-15:02	V769A	770	74.5759	DNPHVCRLL
ERBB4	HLA-B-15:02	G338D	334	45.0983	CDGIGTGSL
ERBB4	HLA-B-15:02	G338D	335	74.8035	DGIGTGSLM
FBXW7	HLA-B-15:02	R505G	511	66.522	GRRVVSGAY
FBXW7	HLA-B-15:02	V485I	486	26.4253	WDIETGQCL
FGFR2	HLA-B-15:02	A362A	352	31.1628	FHSAWLTVL
FGFR2	HLA-B-15:02	A362A	368	87.8877	EITASPDYL
FGFR2	HLA-B-15:02	S299N	301	81.846	YGPDGLPYL
FGFR2	HLA-B-15:02	A266T	254	72.8904	HRPILQAGL
FGFR3	HLA-B-15:02	R252W	251	72.8904	HRPILQAGL
FGFR3	HLA-B-15:02	R252W	259	81.4836	LPANQTAVL
FGFR3	HLA-B-15:02	G370S	365	75.6383	EADEAGSVY
FGFR3	HLA-B-15:02	S371N	365	75.6383	EADEAGSVY
FGFR3	HLA-B-15:02	S787F	781	97.5509	SSSGDDSVF
FGFR3	HLA-B-15:02	S787F	786	97.1991	DSVFAHDLL
FGFR3	HLA-B-15:02	A790T	781	97.5509	SSSGDDSVF
FGFR3	HLA-B-15:02	A790T	786	97.1991	DSVFAHDLL
KRAS	HLA-B-15:02	Q61H	64	70.5219	YSAMRDQYM
KRAS	HLA-B-15:02	G12V	11	57.4152	AGGVGKSAL
KRAS	HLA-B-15:02	G12C	11	57.4152	AGGVGKSAL
MET	HLA-B-15:02	V1237I	1237	82.5656	VHNKTGAKL
PIK3CA	HLA-B-15:02	E545K	549	81.0884	DFLWSHRHY
PIK3CA	HLA-B-15:02	M697T	691	57.526	YCRACGMYL
PIK3CA	HLA-B-15:02	M697T	701	41.8854	HLNRQVEAM
PIK3CA	HLA-B-15:02	E707K	691	57.526	YCRACGMYL
PIK3CA	HLA-B-15:02	E707K	701	41.8854	HLNRQVEAM
PTEN	HLA-B-15:02	S168N	157	63.4813	QLLPSLSSF
PTEN	HLA-B-15:02	P404L	412	34.9441	MYFEFPQPL
SMAD4	HLA-B-15:02	P186L	187	97.5682	SNRASTETY
SMAD4	HLA-B-15:02	P186L	192	42.5033	TETYSTPAL
SMAD4	HLA-B-15:02	P186L	193	79.3539	ETYSTPALL
SMAD4	HLA-B-15:02	A202T	187	97.5682	SNRASTETY
SMAD4	HLA-B-15:02	A202T	192	42.5033	TETYSTPAL
SMAD4	HLA-B-15:02	A202T	193	79.3539	ETYSTPALL
SMAD4	HLA-B-15:02	A202T	206	88.8112	SNATSTANF
SMAD4	HLA-B-15:02	P312L	300	69.1083	HYWPVHNEL
SMAD4	HLA-B-15:02	P312L	302	62.4084	WPVHNELAF
SMAD4	HLA-B-15:02	A327V	323	97.6398	WCSIAYFEM
STK11	HLA-B-15:02	G52R	59	87.078	SYGKVKEVL
STK11	HLA-B-15:02	G270E	255	54.0855	FEGDNIYKL
STK11	HLA-B-15:02	G270E	264	43.479	FENIGKGSY
STK11	HLA-B-15:02	G270E	266	83.7242	NIGKGSYAI
STK11	HLA-B-15:02	G270E	277	55.576	DCGPPLSDL
STK11	HLA-B-15:02	L282R	266	83.7242	NIGKGSYAI
STK11	HLA-B-15:02	L282R	277	55.576	DCGPPLSDL
STK11	HLA-B-15:02	D284F	277	55.576	DCGPPLSDL
TP53	HLA-B-15:02	E339*	340	29.6685	MFRELNEAL
TP53	HLA-B-15:02	R333C	340	29.6685	MFRELNEAL
TP53	HLA-B-15:02	E298*	300	70.2933	PPGSTKRAL
TP53	HLA-B-15:02	R273L	257	88.8424	LEDSSGNLL
TP53	HLA-B-15:02	L252P	256	44.9439	TLEDSSGNL
TP53	HLA-B-15:02	L252P	257	88.8424	LEDSSGNLL
TP53	HLA-B-15:02	R249M	235	42.1146	NYMCNSSCM
TP53	HLA-B-15:02	R249M	256	44.9439	TLEDSSGNL
TP53	HLA-B-15:02	R249M	257	88.8424	LEDSSGNLL
TP53	HLA-B-15:02	G245V	235	42.1146	NYMCNSSCM
TP53	HLA-B-15:02	C242F	235	42.1146	NYMCNSSCM
TP53	HLA-B-15:02	S215I	212	82.3195	FRHSVVVPY
TP53	HLA-B-15:02	Y205C	193	57.9992	HLIRVEGNL
TP53	HLA-B-15:02	Y205C	212	82.3195	FRHSVVVPY
TP53	HLA-B-15:02	H193R	186	53.5843	DGLAPPQHL
TP53	HLA-B-15:02	H193R	193	57.9992	HLIRVEGNL
TP53	HLA-B-15:02	S99F	85	84.5593	PAPAPSWPL
NOTCH1	HLA-B-15:02	L1600R	1585	86.3841	LRNSSFHFL
NOTCH1	HLA-B-15:02	L1600R	1592	16.029	FLRELSRVL
FGFR1	HLA-B-15:02	P146A	144	75.0251	TKPNPVAPY
AKT1	HLA-B-15:03	W22C	10	28.4581	GWLHKRGEY
AKT1	HLA-B-15:03	W22C	18	39.9511	YIKTWRPRY
AKT1	HLA-B-15:03	W22C	19	11.0761	IKTWRPRYF
AKT1	HLA-B-15:03	W22C	27	3.54476	FLLKNDGTF
AKT1	HLA-B-15:03	W22C	29	91.3596	LKNDGTFIG
AKT1	HLA-B-15:03	E17L	10	28.4581	GWLHKRGEY
AKT1	HLA-B-15:03	E17L	18	39.9511	YIKTWRPRY
AKT1	HLA-B-15:03	E17L	19	11.0761	IKTWRPRYF
BRAF	HLA-B-15:03	K601E	590	42.2225	VKIGDFGLA
BRAF	HLA-B-15:03	V590I	575	13.5736	RDLKSNNIF
BRAF	HLA-B-15:03	V590I	590	42.2225	VKIGDFGLA
BRAF	HLA-B-15:03	G466A	460	9.16282	GQRIGSGSF
BRAF	HLA-B-15:03	G466A	464	17.0252	GSGSFGTVY
BRAF	HLA-B-15:03	G466A	472	14.3136	YKGKWHGDV
BRAF	HLA-B-15:03	G466A	474	14.9194	GKWHGDVAV
DDR2	HLA-B-15:03	L94F	78	71.5241	VEPDDLKEF
DDR2	HLA-B-15:03	L94F	83	47.3675	LKEFLQIDL
DDR2	HLA-B-15:03	W771*	762	27.8619	GKFTTASDV
DDR2	HLA-B-15:03	W771*	773	15.0597	FGVTLWETF
DDR2	HLA-B-15:03	W771*	775	49.12	VTLWETFTF
EGFR	HLA-B-15:03	T710I	707	19.3977	LKETEFKKI
EGFR	HLA-B-15:03	T710I	713	61.8937	KKIKVLGSG
EGFR	HLA-B-15:03	T710I	715	1.99454	IKVLGSGAF
EGFR	HLA-B-15:03	R748T	736	89.838	EKVKIPVAI
EGFR	HLA-B-15:03	R748T	756	15.5098	NKEILDEAY
EGFR	HLA-B-15:03	V769A	756	15.5098	NKEILDEAY
EGFR	HLA-B-15:03	V769A	765	81.2717	VMASVDNPH
EGFR	HLA-B-15:03	G873R	861	15.2087	LLGAEEKEY
EGFR	HLA-B-15:03	G873R	870	55.2036	HAEGGKVPI
EGFR	HLA-B-15:03	G873R	878	14.364	IKWMALESI
EGFR	HLA-B-15:03	G873R	879	50.1271	KWMALESIL
EGFR	HLA-B-15:03	p.746_750delA	730	61.4224	LWIPEGEKV
EGFR	HLA-B-15:03	p.746_750delA	736	89.838	EKVKIPVAI
ERBB4	HLA-B-15:03	P594L	583	46.184	FKDGPNCVE
ERBB4	HLA-B-15:03	P594L	597	1.33334	LQGANSFIF
ERBB4	HLA-B-15:03	P594L	599	68.7901	GANSFIFKY
ERBB4	HLA-B-15:03	G338D	345	38.9419	AQTVDSSNI
FBXW7	HLA-B-15:03	R505G	496	65.1709	VLMGHVAAV
FBXW7	HLA-B-15:03	R505G	501	45.1095	VAAVRCVQY
FBXW7	HLA-B-15:03	R505G	507	15.0157	VQYDGRRVV
FGFR2	HLA-B-15:03	V395A	399	70.6783	RMKNTTKKP
FGFR2	HLA-B-15:03	V395A	400	23.248	MKNTTKKPD
FGFR2	HLA-B-15:03	A362A	348	40.8303	IGISFHSAW
FGFR2	HLA-B-15:03	A362A	354	67.6728	SAWLTVLPA
FGFR2	HLA-B-15:03	A362A	355	81.2547	AWLTVLPAP
FGFR2	HLA-B-15:03	A362A	367	38.1678	KEITASPDY
FGFR2	HLA-B-15:03	S299N	299	72.8233	SKYGPDGLP
FGFR2	HLA-B-15:03	S299N	300	41.9952	KYGPDGLPY
FGFR2	HLA-B-15:03	E275K	278	91.1108	CKVYSDAQP
FGFR2	HLA-B-15:03	A266T	258	29.8573	LQAGLPANA
FGFR3	HLA-B-15:03	R252W	238	11.4271	RQTYTLDVL
FGFR3	HLA-B-15:03	R252W	246	61.3586	LERSPHRPI
FGFR3	HLA-B-15:03	R252W	257	97.0885	AGLPANQTA
FGFR3	HLA-B-15:03	G370S	365	70.7786	EADEAGSVY
FGFR3	HLA-B-15:03	G370S	371	96.6668	SVYAGILSY
FGFR3	HLA-B-15:03	G370S	376	78.0304	ILSYGVGFF
FGFR3	HLA-B-15:03	S371N	365	70.7786	EADEAGSVY
FGFR3	HLA-B-15:03	S371N	371	96.6668	SVYAGILSY
FGFR3	HLA-B-15:03	S371N	376	78.0304	ILSYGVGFF
FGFR3	HLA-B-15:03	F384L	371	96.6668	SVYAGILSY
FGFR3	HLA-B-15:03	F384L	376	78.0304	ILSYGVGFF
FGFR3	HLA-B-15:03	F384L	384	50.3419	FLFILVVAA
FGFR3	HLA-B-15:03	S787F	781	25.5156	SSSGDDSVF
FGFR3	HLA-B-15:03	S787F	789	41.9174	FAHDLLPPA
FGFR3	HLA-B-15:03	A790T	781	25.5156	SSSGDDSVF
FGFR3	HLA-B-15:03	A790T	789	41.9174	FAHDLLPPA
KRAS	HLA-B-15:03	K117N	103	1.0823	VKDSEDVPM
KRAS	HLA-B-15:03	Q61H	56	74.8512	LDTAGQEEY
KRAS	HLA-B-15:03	Q61H	59	30.1766	AGQEEYSAM
KRAS	HLA-B-15:03	Q61H	64	63.2996	YSAMRDQYM
KRAS	HLA-B-15:03	D47V	32	28.003	YDPTIEDSY
KRAS	HLA-B-15:03	R41S	32	28.003	YDPTIEDSY
KRAS	HLA-B-15:03	G12V	4	16.7165	YKLVVVGAG
KRAS	HLA-B-15:03	G12C	4	16.7165	YKLVVVGAG
MAP2K1	HLA-B-15:03	D67Y	63	21.7748	LKDDDFEKI
MAP2K1	HLA-B-15:03	D67Y	75	26.438	GAGNGGVVF
MET	HLA-B-15:03	N375S	359	56.4471	RSAMCAFPI
MET	HLA-B-15:03	N375S	361	1.40223	AMCAFPIKY
MET	HLA-B-15:03	N375S	365	90.1452	FPIKYVNDF
MET	HLA-B-15:03	V1237I	1226	68.4778	ARDMYDKEY
MET	HLA-B-15:03	V1237I	1227	15.4709	RDMYDKEYY
MET	HLA-B-15:03	V1237I	1243	32.9777	AKLPVKWMA
PIK3CA	HLA-B-15:03	E545K	532	32.0367	KAISTRDPL
PIK3CA	HLA-B-15:03	E545K	553	85.5353	SHRHYCVTI
PIK3CA	HLA-B-15:03	M697T	699	76.4391	LKHLNRQVE
PIK3CA	HLA-B-15:03	M697T	701	25.3938	HLNRQVEAM
PIK3CA	HLA-B-15:03	M697T	704	28.6425	RQVEAMEKL
PIK3CA	HLA-B-15:03	E707K	699	76.4391	LKHLNRQVE
PIK3CA	HLA-B-15:03	E707K	701	25.3938	HLNRQVEAM
PIK3CA	HLA-B-15:03	E707K	704	28.6425	RQVEAMEKL
PTEN	HLA-B-15:03	S168N	157	5.37207	QLLPSLSSF
PTEN	HLA-B-15:03	S168N	158	32.3353	LLPSLSSFF
PTEN	HLA-B-15:03	M174V	158	32.3353	LLPSLSSFF
PTEN	HLA-B-15:03	P404L	395	52.2249	VKIYSSNSG
PTEN	HLA-B-15:03	P404L	406	91.3523	RREDKFMYF
PTEN	HLA-B-15:03	P404L	411	39.775	FMYFEFPQP
SMAD4	HLA-B-15:03	P186L	182	16.3117	IQHPPSNRA
SMAD4	HLA-B-15:03	P186L	187	52.159	SNRASTETY
SMAD4	HLA-B-15:03	A202T	187	52.159	SNRASTETY
SMAD4	HLA-B-15:03	P312L	301	84.0609	YWPVHNELA
SMAD4	HLA-B-15:03	P312L	302	98.4126	WPVHNELAF
SMAD4	HLA-B-15:03	P312L	310	86.1337	FQPPISNHP
SMAD4	HLA-B-15:03	P312L	314	11.0798	ISNHPAPEY
SMAD4	HLA-B-15:03	P312L	320	24.7579	PEYWCSIAY
SMAD4	HLA-B-15:03	A327V	314	11.0798	ISNHPAPEY
SMAD4	HLA-B-15:03	A327V	320	24.7579	PEYWCSIAY
SMAD4	HLA-B-15:03	A327V	331	40.4203	MDVQVGETF
SMAD4	HLA-B-15:03	A327V	333	60.5077	VQVGETFKV
SMAD4	HLA-B-15:03	A406V	391	71.1627	CKGEGDVWV
SMAD4	HLA-B-15:03	A406V	400	3.36763	RCLSDHAVF
SMAD4	HLA-B-15:03	A406V	405	52.083	HAVFVQSYY
STK11	HLA-B-15:03	G52R	43	12.1901	AKLIGKYLM
STK11	HLA-B-15:03	G270E	264	39.8077	FENIGKGSY
STK11	HLA-B-15:03	G270E	268	48.8801	GKGSYAIPG
STK11	HLA-B-15:03	L282R	268	48.8801	GKGSYAIPG
STK11	HLA-B-15:03	L282R	287	67.5038	KGMLEYEPA
STK11	HLA-B-15:03	L282R	290	15.9323	LEYEPAKRF
STK11	HLA-B-15:03	D284F	268	48.8801	GKGSYAIPG
STK11	HLA-B-15:03	D284F	287	67.5038	KGMLEYEPA
STK11	HLA-B-15:03	D284F	290	15.9323	LEYEPAKRF
STK11	HLA-B-15:03	P326S	310	5.83502	RKKHPPAEA
STK11	HLA-B-15:03	P326S	311	13.7657	KKHPPAEAP
STK11	HLA-B-15:03	P326S	312	54.2027	KHPPAEAPV
STK11	HLA-B-15:03	P326S	331	61.6613	RWRSMTVVP
STK11	HLA-B-15:03	P326S	332	34.1462	WRSMTVVPY
STK11	HLA-B-15:03	P326S	333	85.768	RSMTVVPYL
TP53	HLA-B-15:03	E339*	330	1.5042	LQIRGRERF
TP53	HLA-B-15:03	E339*	333	42.9866	RGRERFEMF
TP53	HLA-B-15:03	E339*	339	96.9279	EMFRELNEA
TP53	HLA-B-15:03	R333C	319	2.28942	KKKPLDGEY
TP53	HLA-B-15:03	R333C	320	2.52963	KKPLDGEYF
TP53	HLA-B-15:03	R333C	330	1.5042	LQIRGRERF
TP53	HLA-B-15:03	R333C	333	42.9866	RGRERFEMF
TP53	HLA-B-15:03	R333C	339	96.9279	EMFRELNEA
TP53	HLA-B-15:03	E298*	291	33.3868	KKGEPHHEL
TP53	HLA-B-15:03	E287*	291	33.3868	KKGEPHHEL
TP53	HLA-B-15:03	E286D	291	33.3868	KKGEPHHEL
TP53	HLA-B-15:03	E285K	291	33.3868	KKGEPHHEL
TP53	HLA-B-15:03	L252P	236	64.7923	YMCNSSCMG
TP53	HLA-B-15:03	R249M	236	64.7923	YMCNSSCMG
TP53	HLA-B-15:03	G245V	236	64.7923	YMCNSSCMG
TP53	HLA-B-15:03	C242F	226	41.1674	GSDCTTIHY
TP53	HLA-B-15:03	C242F	236	64.7923	YMCNSSCMG
TP53	HLA-B-15:03	S215I	212	4.64781	FRHSVVVPY
TP53	HLA-B-15:03	Y205C	197	46.0579	VEGNLRVEY
TP53	HLA-B-15:03	Y205C	212	4.64781	FRHSVVVPY
TP53	HLA-B-15:03	H193R	197	46.0579	VEGNLRVEY
TP53	HLA-B-15:03	H168R	161	94.5612	AIYKQSQHM
TP53	HLA-B-15:03	H168R	163	30.7212	YKQSQHMTE
TP53	HLA-B-15:03	H168R	164	35.3446	KQSQHMTEV
TP53	HLA-B-15:03	H168R	166	67.2944	SQHMTEVVR
TP53	HLA-B-15:03	Q165*	161	94.5612	AIYKQSQHM
TP53	HLA-B-15:03	Q165*	163	30.7212	YKQSQHMTE
TP53	HLA-B-15:03	Q165*	164	35.3446	KQSQHMTEV
TP53	HLA-B-15:03	Q165*	166	67.2944	SQHMTEVVR
TP53	HLA-B-15:03	R158L	143	45.1377	VQLWVDSTP
TP53	HLA-B-15:03	R158L	145	76.5201	LWVDSTPPP
TP53	HLA-B-15:03	R158L	161	94.5612	AIYKQSQHM
TP53	HLA-B-15:03	R158L	163	30.7212	YKQSQHMTE
TP53	HLA-B-15:03	R158L	164	35.3446	KQSQHMTEV
TP53	HLA-B-15:03	R158L	166	67.2944	SQHMTEVVR
TP53	HLA-B-15:03	V157F	143	45.1377	VQLWVDSTP
TP53	HLA-B-15:03	V157F	145	76.5201	LWVDSTPPP
TP53	HLA-B-15:03	V157F	161	94.5612	AIYKQSQHM
TP53	HLA-B-15:03	V157F	163	30.7212	YKQSQHMTE
TP53	HLA-B-15:03	V157F	164	35.3446	KQSQHMTEV
TP53	HLA-B-15:03	Q104*	95	14.4001	SSVPSQKTY
TP53	HLA-B-15:03	Q104*	99	1.62564	SQKTYQGSY
TP53	HLA-B-15:03	Q104*	101	74.9885	KTYQGSYGF
TP53	HLA-B-15:03	Q104*	103	10.594	YQGSYGFRL
TP53	HLA-B-15:03	Q104*	105	35.7013	GSYGFRLGF
TP53	HLA-B-15:03	Q104*	111	94.0172	LGFLHSGTA
TP53	HLA-B-15:03	S99F	83	45.3693	AAPAPAPSW
TP53	HLA-B-15:03	S99F	95	14.4001	SSVPSQKTY
TP53	HLA-B-15:03	S99F	99	1.62564	SQKTYQGSY
TP53	HLA-B-15:03	S99F	101	74.9885	KTYQGSYGF
TP53	HLA-B-15:03	S99F	103	10.594	YQGSYGFRL
TP53	HLA-B-15:03	S99F	105	35.7013	GSYGFRLGF
TP53	HLA-B-15:03	E68K	65	7.19277	RMPEAAPPV
NOTCH1	HLA-B-15:03	L1600R	1584	14.432	QLRNSSFHF
NOTCH1	HLA-B-15:03	L1600R	1598	20.8348	RVLHTNVVF
FGFR1	HLA-B-15:03	P146A	144	1.03771	TKPNPVAPY
BRAF	HLA-B-15:17	K601E	601	40.11	KSRWSGSHQ
BRAF	HLA-B-15:17	G466A	464	35.1537	GSGSFGTVY
DDR2	HLA-B-15:17	W771*	771	86.911	WAFGVTLWE
DDR2	HLA-B-15:17	W771*	775	2.88646	VTLWETFTF
EGFR	HLA-B-15:17	V769A	767	75.6103	ASVDNPHVC
ERBB4	HLA-B-15:17	P594L	599	43.9196	GANSFIFKY
FBXW7	HLA-B-15:17	R505G	501	24.8939	VAAVRCVQY
FBXW7	HLA-B-15:17	R505G	513	37.4594	RVVSGAYDF
FBXW7	HLA-B-15:17	V485I	475	12.2892	VSGSRDATL
FGFR3	HLA-B-15:17	R252W	239	83.8469	QTYTLDVLE
FGFR3	HLA-B-15:17	G370S	371	3.94412	SVYAGILSY
FGFR3	HLA-B-15:17	G370S	377	8.3558	LSYGVGFFL
FGFR3	HLA-B-15:17	S371N	371	3.94412	SVYAGILSY
FGFR3	HLA-B-15:17	S371N	377	8.3558	LSYGVGFFL
FGFR3	HLA-B-15:17	F384L	371	3.94412	SVYAGILSY
FGFR3	HLA-B-15:17	F384L	377	8.3558	LSYGVGFFL
FGFR3	HLA-B-15:17	F384L	390	48.7529	VAAVTLCRL
FGFR3	HLA-B-15:17	S787F	781	29.2531	SSSGDDSVF
FGFR3	HLA-B-15:17	A790T	781	29.2531	SSSGDDSVF
KRAS	HLA-B-15:17	Q61H	64	13.0288	YSAMRDQYM
KRAS	HLA-B-15:17	G12V	16	24.3801	KSALTIQLI
KRAS	HLA-B-15:17	G12C	16	24.3801	KSALTIQLI
MET	HLA-B-15:17	N375S	359	16.5402	RSAMCAFPI
PIK3CA	HLA-B-15:17	E545K	535	40.4556	STRDPLSEI
PIK3CA	HLA-B-15:17	M697T	689	12.9698	ESYCRACGM
PTEN	HLA-B-15:17	S168N	163	3.37762	SSFFFSHRL
PTEN	HLA-B-15:17	M174V	163	3.37762	SSFFFSHRL
SMAD4	HLA-B-15:17	P186L	193	7.44898	ETYSTPALL
SMAD4	HLA-B-15:17	A202T	193	7.44898	ETYSTPALL
SMAD4	HLA-B-15:17	A202T	208	75.4383	ATSTANFPN
SMAD4	HLA-B-15:17	P312L	314	3.00089	ISNHPAPEY
SMAD4	HLA-B-15:17	A327V	314	3.00089	ISNHPAPEY
SMAD4	HLA-B-15:17	A406V	405	18.0807	HAVFVQSYY
SMAD4	HLA-B-15:17	A406V	406	50.5049	AVFVQSYYL
STK11	HLA-B-15:17	G52R	42	71.038	RAKLIGKYL
STK11	HLA-B-15:17	P326S	333	10.5935	RSMTVVPYL
TP53	HLA-B-15:17	L252P	255	47.8597	ITLEDSSGN
TP53	HLA-B-15:17	R249M	255	47.8597	ITLEDSSGN
TP53	HLA-B-15:17	C242F	226	41.7815	GSDCTTIHY
TP53	HLA-B-15:17	H168R	161	72.6505	AIYKQSQHM
TP53	HLA-B-15:17	Q165*	161	72.6505	AIYKQSQHM
TP53	HLA-B-15:17	R158L	161	72.6505	AIYKQSQHM
TP53	HLA-B-15:17	V157F	161	72.6505	AIYKQSQHM
TP53	HLA-B-15:17	Q104*	95	5.06898	SSVPSQKTY
TP53	HLA-B-15:17	Q104*	101	1.14282	KTYQGSYGF
TP53	HLA-B-15:17	Q104*	105	6.75205	GSYGFRLGF
TP53	HLA-B-15:17	S99F	83	35.6861	AAPAPAPSW
TP53	HLA-B-15:17	S99F	95	5.06898	SSVPSQKTY
TP53	HLA-B-15:17	S99F	101	1.14282	KTYQGSYGF
TP53	HLA-B-15:17	S99F	105	6.75205	GSYGFRLGF
NOTCH1	HLA-B-15:17	L1600R	1588	39.6599	SSFHFLREL
NOTCH1	HLA-B-15:17	L1600R	1598	12.542	RVLHTNVVF
DDR2	HLA-B-18:01	W771*	756	25.1883	WESILLGKF
SMAD4	HLA-B-18:01	P312L	320	63.6539	PEYWCSIAY
SMAD4	HLA-B-18:01	A327V	320	63.6539	PEYWCSIAY
STK11	HLA-B-18:01	G270E	264	65.1787	FENIGKGSY
TP53	HLA-B-18:01	Y205C	197	87.4049	VEGNLRVEY
TP53	HLA-B-18:01	H193R	197	87.4049	VEGNLRVEY
AKT1	HLA-B-27:05	W22C	22	25.2096	WRPRYFLLK
AKT1	HLA-B-27:05	E17L	22	25.2096	WRPRYFLLK
BRAF	HLA-B-27:05	K601E	602	60.7832	SRWSGSHQF
STK11	HLA-B-27:05	G52R	41	90.1616	KRAKLIGKY
TP53	HLA-B-27:05	S215I	212	88.9177	FRHSVVVPY
TP53	HLA-B-27:05	Y205C	212	88.9177	FRHSVVVPY
DDR2	HLA-B-35:01	W771*	773	61.2674	FGVTLWETF
FGFR3	HLA-B-35:01	R252W	259	31.1718	LPANQTAVL
FGFR3	HLA-B-35:01	G370S	365	45.5858	EADEAGSVY
FGFR3	HLA-B-35:01	S371N	365	45.5858	EADEAGSVY
MET	HLA-B-35:01	N375S	365	21.7022	FPIKYVNDF
PTEN	HLA-B-35:01	S168N	159	14.56	LPSLSSFFF
PTEN	HLA-B-35:01	M174V	159	14.56	LPSLSSFFF
SMAD4	HLA-B-35:01	P312L	302	1.2245	WPVHNELAF
SMAD4	HLA-B-35:01	A327V	323	90.5083	WCSIAYFEM
SMAD4	HLA-B-35:01	A406V	405	79.7227	HAVFVQSYY
TP53	HLA-B-35:01	Q104*	91	24.5446	WPLSSSVPS
TP53	HLA-B-35:01	S99F	91	24.5446	WPLSSSVPS
TP53	HLA-B-35:01	E68K	66	81.3557	MPEAAPPVA
FGFR2	HLA-B-39:01	A362A	352	4.59459	FHSAWLTVL
PTEN	HLA-B-39:01	P404L	412	58.1306	MYFEFPQPL
TP53	HLA-B-39:01	L252P	249	56.449	RPILTIITL
TP53	HLA-B-39:01	R249M	249	56.449	RPILTIITL
TP53	HLA-B-39:01	G245V	249	56.449	RPILTIITL
TP53	HLA-B-39:01	C242F	249	56.449	RPILTIITL
EGFR	HLA-B-40:02	T710I	710	80.0262	TEFKKIKVL
KRAS	HLA-B-40:02	Q61H	48	83.2561	GETCLLDIL
KRAS	HLA-B-40:02	D47V	48	83.2561	GETCLLDIL
KRAS	HLA-B-40:02	R41S	48	83.2561	GETCLLDIL
SMAD4	HLA-B-40:02	P186L	192	94.7785	TETYSTPAL
SMAD4	HLA-B-40:02	A202T	192	94.7785	TETYSTPAL
SMAD4	HLA-B-40:02	P312L	306	40.6584	NELAFQPPI
STK11	HLA-B-40:02	D284F	292	42.1485	YEPAKRFSI
TP53	HLA-B-40:02	E339*	342	54.2054	RELNEALEL
MET	HLA-B-53:01	N375S	365	21.5618	FPIKYVNDF
PTEN	HLA-B-53:01	S168N	159	23.0442	LPSLSSFFF
PTEN	HLA-B-53:01	M174V	159	23.0442	LPSLSSFFF
SMAD4	HLA-B-53:01	P312L	302	38.8239	WPVHNELAF
FGFR1	HLA-B-53:01	P146A	145	46.372	KPNPVAPYW
FGFR2	HLA-B-54:01	S299N	306	23.7095	LPYLKVLKA
FGFR2	HLA-B-54:01	E275K	262	75.1358	LPANASTVV
FGFR2	HLA-B-54:01	E275K	276	52.7225	FVCKVYSDA
FGFR2	HLA-B-54:01	A266T	262	75.1358	LPANASTVV
FGFR3	HLA-B-54:01	F384L	383	24.6413	FFLFILVVA
FGFR3	HLA-B-54:01	F384L	384	26.6248	FLFILVVAA
FGFR3	HLA-B-54:01	S787F	789	16.8081	FAHDLLPPA
FGFR3	HLA-B-54:01	A790T	789	16.8081	FAHDLLPPA
TP53	HLA-B-54:01	E68K	66	15.0155	MPEAAPPVA
TP53	HLA-B-54:01	E68K	76	77.6101	APAAPTPAA
DDR2	HLA-B-58:01	W771*	763	95.8568	KFTTASDVW
KRAS	HLA-B-58:01	G12V	16	41.0254	KSALTIQLI
KRAS	HLA-B-58:01	G12C	16	41.0254	KSALTIQLI
MET	HLA-B-58:01	N375S	359	49.9324	RSAMCAFPI
SMAD4	HLA-B-58:01	P312L	314	97.0028	ISNHPAPEY
SMAD4	HLA-B-58:01	A327V	314	97.0028	ISNHPAPEY
STK11	HLA-B-58:01	P326S	333	50.6679	RSMTVVPYL
TP53	HLA-B-58:01	Q104*	101	47.1603	KTYQGSYGF
TP53	HLA-B-58:01	S99F	101	47.1603	KTYQGSYGF
FGFR1	HLA-B-58:01	P146A	145	27.4444	KPNPVAPYW
EGFR	HLA-B-73:01	R748T	747	10.9334	LREATSPKA
EGFR	HLA-B-73:01	p.746_750delA	747	10.9334	LREATSPKA
FBXW7	HLA-B-73:01	R505G	494	91.176	LHVLMGHVA
FGFR3	HLA-B-73:01	F384L	383	66.4161	FFLFILVVA
FGFR3	HLA-B-73:01	F384L	384	91.5754	FLFILVVAA
FGFR3	HLA-B-73:01	S787F	789	70.5466	FAHDLLPPA
FGFR3	HLA-B-73:01	A790T	789	70.5466	FAHDLLPPA
KRAS	HLA-B-73:01	R41S	26	98.3435	NHFVDEYDP
PTEN	HLA-B-73:01	P404L	411	75.815	FMYFEFPQP
SMAD4	HLA-B-73:01	P186L	182	99.4848	IQHPPSNRA
TP53	HLA-B-73:01	D281G	268	19.5877	NSFEVRVCA
TP53	HLA-B-73:01	R280T	268	19.5877	NSFEVRVCA
TP53	HLA-B-73:01	P278L	268	19.5877	NSFEVRVCA
TP53	HLA-B-73:01	V274F	268	19.5877	NSFEVRVCA
TP53	HLA-B-73:01	R273L	268	19.5877	NSFEVRVCA
TP53	HLA-B-73:01	Q104*	111	60.325	LGFLHSGTA
TP53	HLA-B-73:01	E68K	64	49.8795	PRMPEAAPP
TP53	HLA-B-73:01	E68K	66	98.1309	MPEAAPPVA
FGFR1	HLA-B-73:01	P146A	142	79.7692	DNTKPNPVA

## Sheet: Suppl. Table 3
Supplementary table 3: Results of the NetChop analysis. For every amino acid position in a given fragment ( 25 amino acids per fragment), NetChop calculates the probability for proteasomal cleavage. The programm was run two consecutive times with ("Mut.prob") and without ("Wild.prob") a non-synonymous mutation inside the fragment . Only cleavage sites with a difference of 50 and higher are displa…
Gene_Hugo	Wild.AA	Mut.AA	Wild.prob	Mut.prob	Difference	Position	Variant	mutated_fragments	wildtype_fragments	fragment_length
AKT1	W	C	0.939353	0.18955	0.749803	20	W22C	WLHKRGEYIKTC	WLHKRGEYI	12
AKT1	W	C	0.683044	0.025881	0.657163	3	W22C	PRYFLLKNDGTFI	LLKNDGTFI	13
AKT1	W	C	0.974681	0.422511	0.55217	22	W22C	KEGWLHKRGEYIKT	KEGWLHKRG	14
AKT1	W	C	0.958483	0.14581	0.812673	18	W22C	HKRGEYIKTC	HKRGEYIKT	10
AKT1	W	C	0.959136	0.124117	0.835019	15	W22C	GEYIKTC	GEYIKTWRP	7
AKT1	W	C	0.959136	0.124117	0.835019	11	W22C	KTC	KTWRPRYFL	3
AKT1	W	C	0.959136	0.124117	0.835019	10	W22C	TC	TWRPRYFLL	2
AKT1	W	C	0.86077	0.041886	0.818884	5	W22C	KTCRPRYFLLKNDGT	YFLLKNDGT	15
AKT1	W	C	0.836218	0.035399	0.800819	4	W22C	CRPRYFLLKNDGTF	FLLKNDGTF	14
AKT1	W	C	0.703723	0.027594	0.676129	2	W22C	YFLLKNDGTFIG	LKNDGTFIG	12
AKT1	L	L	0.923597	0.407466	0.516131	8	W22C	KTCRPRYFLLKNDGTFIG	LKNDGTFIG	18
AKT1	E	L	0.03767	0.673196	0.635526	17	E17L	MSDVAIVKE	MSDVAIVKE	9
AKT1	W	C	0.796145	0.050817	0.745328	6	W22C	YIKTCRPRYFLLKNDG	RYFLLKNDG	16
AKT1	E	L	0.025468	0.748459	0.722991	1	E17L	RPRYFLLKNDG	RYFLLKNDG	11
AKT1	W	C	0.970435	0.42156	0.548875	22	W22C	IVKEGWLHKRGEYI	IVKEGWLHK	14
AKT1	W	C	0.947985	0.182198	0.765787	19	W22C	LHKRGEYIKTC	LHKRGEYIK	11
AKT1	W	C	0.972742	0.293535	0.679207	21	W22C	GWLHKRGEYIKTC	GWLHKRGEY	13
AKT1	W	C	0.959136	0.124117	0.835019	13	W22C	YIKTC	YIKTWRPRY	5
AKT1	W	C	0.959136	0.124117	0.835019	16	W22C	RGEYIKTC	RGEYIKTWR	8
AKT1	W	C	0.959136	0.124117	0.835019	12	W22C	IKTC	IKTWRPRYF	4
AKT1	E	L	0.023039	0.524469	0.50143	7	E17L	WLHKRGLYIKTWRPRYF	IKTWRPRYF	17
AKT1	W	C	0.959136	0.124117	0.835019	9	W22C	LHKRGEYIKTCRPRYFLLK	WRPRYFLLK	19
BRAF	K	E	0.963301	0.188104	0.775197	18	K601E	IGDFGLATVE	IGDFGLATV	10
BRAF	K	E	0.936631	0.137663	0.798968	21	K601E	TVKIGDFGLATVE	TVKIGDFGL	13
BRAF	K	E	0.908481	0.115434	0.793047	20	K601E	VKIGDFGLATVE	VKIGDFGLA	12
BRAF	K	E	0.94537	0.190004	0.755366	19	K601E	KIGDFGLATVE	KIGDFGLAT	11
BRAF	K	E	0.961105	0.160322	0.800783	11	K601E	TVE	TVKSRWSGS	3
BRAF	K	E	0.961105	0.160322	0.800783	9	K601E	KIGDFGLATVESRWSGSHQ	KSRWSGSHQ	19
BRAF	K	E	0.942151	0.193093	0.749058	7	K601E	FGLATVESRWSGSHQFE	RWSGSHQFE	17
BRAF	K	E	0.883278	0.102658	0.78062	6	K601E	LATVESRWSGSHQFEQ	WSGSHQFEQ	16
BRAF	K	E	0.914441	0.066185	0.848256	5	K601E	TVESRWSGSHQFEQL	SGSHQFEQL	15
BRAF	K	E	0.929773	0.104097	0.825676	4	K601E	ESRWSGSHQFEQLS	GSHQFEQLS	14
BRAF	K	E	0.805971	0.061329	0.744642	2	K601E	SGSHQFEQLSGS	HQFEQLSGS	12
BRAF	K	E	0.92735	0.116291	0.811059	8	K601E	GDFGLATVESRWSGSHQF	SRWSGSHQF	18
EGFR	T	I	0.057289	0.562783	0.505494	1	T710I	KVLGSGAFGTV	LGSGAFGTV	11
EGFR	T	I	0.095912	0.656197	0.560285	2	T710I	KIKVLGSGAFGT	VLGSGAFGT	12
EGFR	T	I	0.362787	0.881628	0.518841	25	T710I	PSGEAPNQALLRILKEI	PSGEAPNQA	17
EGFR	T	I	0.432617	0.934473	0.501856	21	T710I	APNQALLRILKEI	APNQALLRI	13
EGFR	T	I	0.187627	0.886954	0.699327	17	T710I	ALLRILKEI	ALLRILKET	9
EGFR	T	I	0.187627	0.886954	0.699327	16	T710I	LLRILKEI	LLRILKETE	8
EGFR	T	I	0.187627	0.886954	0.699327	12	T710I	LKEI	LKETEFKKI	4
EGFR	T	I	0.187627	0.886954	0.699327	9	T710I	NQALLRILKEIEFKKIKVL	TEFKKIKVL	19
EGFR	T	I	0.093162	0.688215	0.595053	5	T710I	KEIEFKKIKVLGSGA	KIKVLGSGA	15
EGFR	T	I	0.070584	0.62366	0.553076	3	T710I	FKKIKVLGSGAFG	KVLGSGAFG	13
EGFR	R	T	0.837806	0.282531	0.555275	19	R748T	VKIPVAIKELT	VKIPVAIKE	11
EGFR	R	T	0.872278	0.266322	0.605956	18	R748T	KIPVAIKELT	KIPVAIKEL	10
EGFR	R	T	0.876476	0.266617	0.609859	15	R748T	VAIKELT	VAIKELREA	7
EGFR	R	T	0.876476	0.266617	0.609859	14	R748T	AIKELT	AIKELREAT	6
EGFR	R	T	0.876476	0.266617	0.609859	13	R748T	IKELT	IKELREATS	5
EGFR	R	T	0.876476	0.266617	0.609859	12	R748T	KELT	KELREATSP	4
EGFR	R	T	0.876476	0.266617	0.609859	10	R748T	LT	LREATSPKA	2
EGFR	R	T	0.595293	0.07135	0.523943	3	R748T	ATSPKANKEILDE	KANKEILDE	13
EGFR	R	T	0.660939	0.113104	0.547835	2	R748T	SPKANKEILDEA	ANKEILDEA	12
EGFR	G	R	0.308887	0.81155	0.502663	19	G873R	GAEEKEYHAER	GAEEKEYHA	11
EGFR	G	R	0.274468	0.798291	0.523823	18	G873R	AEEKEYHAER	AEEKEYHAE	10
EGFR	G	R	0.202832	0.744835	0.542003	13	G873R	YHAER	YHAEGGKVP	5
EGFR	G	R	0.202832	0.744835	0.542003	12	G873R	HAER	HAEGGKVPI	4
EGFR	G	R	0.178209	0.684157	0.505948	8	G873R	EEKEYHAERGKVPIKWMA	GKVPIKWMA	18
EGFR	G	R	0.164679	0.673788	0.509109	7	G873R	KEYHAERGKVPIKWMAL	KVPIKWMAL	17
EGFR	T	I	0.187627	0.886954	0.699327	14	T710I	RILKEI	RILKETEFK	6
EGFR	T	I	0.433622	0.938131	0.504509	22	T710I	EAPNQALLRILKEI	EAPNQALLR	14
EGFR	R	T	0.876476	0.266617	0.609859	17	R748T	IPVAIKELT	IPVAIKELR	9
EGFR	R	T	0.799801	0.20509	0.594711	8	R748T	IPVAIKELTEATSPKANK	EATSPKANK	18
EGFR	T	I	0.065756	0.645373	0.579617	4	T710I	IEFKKIKVLGSGAF	IKVLGSGAF	14
EGFR	R	T	0.680727	0.132398	0.548329	1	R748T	KANKEILDEAY	NKEILDEAY	11
EGFR	R	T	0.873025	0.37153	0.501495	21	R748T	EKVKIPVAIKELT	EKVKIPVAI	13
ERBB4	P	L	0.026631	0.704067	0.677436	7	P594L	NCVEKCLDGLQGANSFI	GLQGANSFI	17
ERBB4	P	L	0.205956	0.965842	0.759886	24	P594L	KCSHFKDGPNCVEKCL	KCSHFKDGP	16
ERBB4	P	L	0.147798	0.960774	0.812976	21	P594L	HFKDGPNCVEKCL	HFKDGPNCV	13
ERBB4	P	L	0.136388	0.949153	0.812765	20	P594L	FKDGPNCVEKCL	FKDGPNCVE	12
ERBB4	P	L	0.129138	0.957694	0.828556	17	P594L	GPNCVEKCL	GPNCVEKCP	9
ERBB4	P	L	0.129138	0.957694	0.828556	14	P594L	CVEKCL	CVEKCPDGL	6
ERBB4	P	L	0.129138	0.957694	0.828556	11	P594L	KCL	KCPDGLQGA	3
ERBB4	P	L	0.031902	0.855788	0.823886	3	P594L	GLQGANSFIFKYA	ANSFIFKYA	13
ERBB4	P	L	0.043097	0.856589	0.813492	1	P594L	ANSFIFKYADP	SFIFKYADP	11
ERBB4	P	L	0.035118	0.889235	0.854117	5	P594L	KCLDGLQGANSFIFK	QGANSFIFK	15
ERBB4	P	L	0.028835	0.855029	0.826194	4	P594L	LDGLQGANSFIFKY	GANSFIFKY	14
ERBB4	P	L	0.027813	0.704013	0.6762	6	P594L	VEKCLDGLQGANSFIF	LQGANSFIF	16
FBXW7	R	G	0.679379	0.168088	0.511291	19	R505G	HVLMGHVAAVG	HVLMGHVAA	11
FBXW7	R	G	0.697245	0.099997	0.597248	5	R505G	AVGCVQYDGRRVVSG	YDGRRVVSG	15
FBXW7	R	G	0.585175	0.065563	0.519612	3	R505G	VQYDGRRVVSGAY	GRRVVSGAY	13
FGFR2	E	K	0.043373	0.559689	0.516316	23	E275K	GLPANASTVVGGDVK	GLPANASTV	15
FGFR2	E	K	0.059203	0.686061	0.626858	24	E275K	AGLPANASTVVGGDVK	AGLPANAST	16
FGFR2	E	K	0.048483	0.634658	0.586175	22	E275K	LPANASTVVGGDVK	LPANASTVV	14
FGFR3	A	T	0.69777	0.117119	0.580651	10	A790T	FT	FAHDLLPPA	2
FGFR3	S	F	0.033319	0.627808	0.594489	16	S787F	SSSSGDDF	SSSSGDDSV	8
FGFR3	S	F	0.033319	0.627808	0.594489	14	S787F	SSGDDF	SSGDDSVFA	6
FGFR3	S	F	0.033319	0.627808	0.594489	9	S787F	TPSSSSSGDDFVFAHDLLP	SVFAHDLLP	19
FGFR3	S	F	0.029332	0.531188	0.501856	5	S787F	DDFVFAHDLLPPAPP	HDLLPPAPP	15
FGFR3	S	F	0.030759	0.665395	0.634636	3	S787F	FAHDLLPPAPPSS	LLPPAPPSS	13
FGFR3	A	T	0.69777	0.117119	0.580651	17	A790T	SSGDDSVFT	SSGDDSVFA	9
FGFR3	A	T	0.69777	0.117119	0.580651	12	A790T	SVFT	SVFAHDLLP	4
FGFR3	A	T	0.69777	0.117119	0.580651	11	A790T	VFT	VFAHDLLPP	3
FGFR3	A	T	0.69777	0.117119	0.580651	9	A790T	SSSSGDDSVFTHDLLPPAP	AHDLLPPAP	19
FGFR3	A	T	0.622849	0.093897	0.528952	6	A790T	DSVFTHDLLPPAPPSS	LLPPAPPSS	16
FGFR3	S	F	0.033319	0.627808	0.594489	15	S787F	SSSGDDF	SSSGDDSVF	7
FGFR3	S	F	0.033319	0.627808	0.594489	10	S787F	DF	DSVFAHDLL	2
FGFR3	A	T	0.69777	0.117119	0.580651	13	A790T	DSVFT	DSVFAHDLL	5
KRAS	D	V	0.04155	0.803801	0.762251	5	D47V	VIVGETCLLDILDTA	CLLDILDTA	15
KRAS	R	S	0.791136	0.132979	0.658157	22	R41S	FVDEYDPTIEDSYS	FVDEYDPTI	14
KRAS	K	N	0.761772	0.037827	0.723945	14	K117N	VLVGNN	VLVGNKCDL	6
KRAS	D	V	0.060241	0.930881	0.87064	11	D47V	VIV	VIDGETCLL	3
KRAS	K	N	0.719319	0.134153	0.585166	25	K117N	KRVKDSEDVPMVLVGNN	KRVKDSEDV	17
KRAS	K	N	0.815628	0.271553	0.544075	24	K117N	RVKDSEDVPMVLVGNN	RVKDSEDVP	16
KRAS	K	N	0.65053	0.10576	0.54477	22	K117N	KDSEDVPMVLVGNN	KDSEDVPMV	14
KRAS	K	N	0.652843	0.052922	0.599921	20	K117N	SEDVPMVLVGNN	SEDVPMVLV	12
KRAS	K	N	0.761772	0.037827	0.723945	15	K117N	MVLVGNN	MVLVGNKCD	7
KRAS	K	N	0.761772	0.037827	0.723945	13	K117N	LVGNN	LVGNKCDLP	5
KRAS	K	N	0.761772	0.037827	0.723945	10	K117N	NN	NKCDLPSRT	2
KRAS	K	N	0.761772	0.037827	0.723945	9	K117N	EDVPMVLVGNNCDLPSRTV	KCDLPSRTV	19
KRAS	K	N	0.670989	0.028293	0.642696	4	K117N	NCDLPSRTVDTKQA	SRTVDTKQA	14
KRAS	K	N	0.622854	0.035361	0.587493	1	K117N	RTVDTKQAQDL	VDTKQAQDL	11
KRAS	D	V	0.131308	0.931066	0.799758	21	D47V	TIEDSYRKQVVIV	TIEDSYRKQ	13
KRAS	D	V	0.069476	0.867199	0.797723	20	D47V	IEDSYRKQVVIV	IEDSYRKQV	12
KRAS	D	V	0.060241	0.930881	0.87064	16	D47V	YRKQVVIV	YRKQVVIDG	8
KRAS	D	V	0.060241	0.930881	0.87064	15	D47V	RKQVVIV	RKQVVIDGE	7
KRAS	D	V	0.060241	0.930881	0.87064	14	D47V	KQVVIV	KQVVIDGET	6
KRAS	D	V	0.060241	0.930881	0.87064	12	D47V	VVIV	VVIDGETCL	4
KRAS	D	V	0.060241	0.930881	0.87064	10	D47V	IV	IDGETCLLD	2
KRAS	D	V	0.044017	0.826324	0.782307	8	D47V	SYRKQVVIVGETCLLDIL	GETCLLDIL	18
KRAS	D	V	0.038773	0.67984	0.641067	6	D47V	QVVIVGETCLLDILDT	TCLLDILDT	16
KRAS	D	V	0.042097	0.854836	0.812739	4	D47V	VGETCLLDILDTAG	LLDILDTAG	14
KRAS	D	V	0.038786	0.653923	0.615137	1	D47V	LDILDTAGQEE	ILDTAGQEE	11
KRAS	R	S	0.891991	0.343439	0.548552	24	R41S	NHFVDEYDPTIEDSYS	NHFVDEYDP	16
KRAS	R	S	0.867728	0.291701	0.576027	23	R41S	HFVDEYDPTIEDSYS	HFVDEYDPT	15
KRAS	R	S	0.560406	0.058656	0.50175	21	R41S	VDEYDPTIEDSYS	VDEYDPTIE	13
KRAS	R	S	0.652182	0.057132	0.59505	15	R41S	TIEDSYS	TIEDSYRKQ	7
KRAS	R	S	0.652182	0.057132	0.59505	14	R41S	IEDSYS	IEDSYRKQV	6
KRAS	R	S	0.652182	0.057132	0.59505	10	R41S	YS	YRKQVVIDG	2
KRAS	R	S	0.652182	0.057132	0.59505	9	R41S	EYDPTIEDSYSKQVVIDGE	RKQVVIDGE	19
KRAS	D	V	0.245723	0.930389	0.684666	23	D47V	DPTIEDSYRKQVVIV	DPTIEDSYR	15
KRAS	R	S	0.652182	0.057132	0.59505	17	R41S	DPTIEDSYS	DPTIEDSYR	9
KRAS	K	N	0.755831	0.212988	0.542843	23	K117N	VKDSEDVPMVLVGNN	VKDSEDVPM	15
KRAS	D	V	0.252079	0.920411	0.668332	24	D47V	YDPTIEDSYRKQVVIV	YDPTIEDSY	16
KRAS	R	S	0.704972	0.065532	0.63944	18	R41S	YDPTIEDSYS	YDPTIEDSY	10
MAP2K1	D	Y	0.022992	0.529919	0.506927	3	D67Y	EKISELGAGNGGV	ELGAGNGGV	13
MAP2K1	D	Y	0.038015	0.721	0.682985	24	D67Y	AFLTQKQKVGELKDDY	AFLTQKQKV	16
MAP2K1	D	Y	0.034918	0.776698	0.74178	23	D67Y	FLTQKQKVGELKDDY	FLTQKQKVG	15
MAP2K1	D	Y	0.025206	0.719167	0.693961	2	D67Y	ISELGAGNGGVV	LGAGNGGVV	12
MAP2K1	D	Y	0.038547	0.753489	0.714942	25	D67Y	EAFLTQKQKVGELKDDY	EAFLTQKQK	17
MAP2K1	D	Y	0.027488	0.739778	0.71229	1	D67Y	ELGAGNGGVVF	GAGNGGVVF	11
PIK3CA	E	K	0.06863	0.885403	0.816773	4	E545K	KQEKDFLWSHRHYC	FLWSHRHYC	14
PIK3CA	E	K	0.151908	0.958676	0.806768	23	E545K	LKAISTRDPLSEITK	LKAISTRDP	15
PIK3CA	E	K	0.098933	0.954785	0.855852	22	E545K	KAISTRDPLSEITK	KAISTRDPL	14
PIK3CA	E	K	0.101122	0.957097	0.855975	21	E545K	AISTRDPLSEITK	AISTRDPLS	13
PIK3CA	E	K	0.066624	0.8902	0.823576	20	E545K	ISTRDPLSEITK	ISTRDPLSE	12
PIK3CA	E	K	0.05589	0.892918	0.837028	18	E545K	TRDPLSEITK	TRDPLSEIT	10
PIK3CA	E	K	0.066363	0.900213	0.83385	15	E545K	PLSEITK	PLSEITEQE	7
PIK3CA	E	K	0.066363	0.900213	0.83385	11	E545K	ITK	ITEQEKDFL	3
PIK3CA	E	K	0.091484	0.87976	0.788276	3	E545K	EKDFLWSHRHYCV	LWSHRHYCV	13
PIK3CA	E	K	0.08273	0.767406	0.684676	2	E545K	DFLWSHRHYCVT	WSHRHYCVT	12
PIK3CA	E	K	0.037647	0.653879	0.616232	1	E545K	LWSHRHYCVTI	SHRHYCVTI	11
PIK3CA	E	K	0.048159	0.703037	0.654878	25	E707K	YCRACGMYLKHLNRQVK	YCRACGMYL	17
PIK3CA	E	K	0.031347	0.657506	0.626159	22	E707K	ACGMYLKHLNRQVK	ACGMYLKHL	14
PIK3CA	E	K	0.028965	0.649532	0.620567	21	E707K	CGMYLKHLNRQVK	CGMYLKHLN	13
PIK3CA	E	K	0.025018	0.562722	0.537704	3	E707K	MEKLINLTDILKQ	INLTDILKQ	13
PIK3CA	E	K	0.05426	0.850387	0.796127	5	E545K	ITKQEKDFLWSHRHY	DFLWSHRHY	15
PIK3CA	E	K	0.065575	0.900972	0.835397	19	E545K	STRDPLSEITK	STRDPLSEI	11
PTEN	P	L	0.028067	0.777357	0.74929	2	P404L	EDKFMYFEFPQP	FMYFEFPQP	12
PTEN	P	L	0.195308	0.904507	0.709199	24	P404L	VVCQLKVKIYSSNSGL	VVCQLKVKI	16
PTEN	P	L	0.139922	0.938539	0.798617	22	P404L	CQLKVKIYSSNSGL	CQLKVKIYS	14
PTEN	P	L	0.135952	0.943358	0.807406	21	P404L	QLKVKIYSSNSGL	QLKVKIYSS	13
PTEN	P	L	0.096147	0.957442	0.861295	19	P404L	KVKIYSSNSGL	KVKIYSSNS	11
PTEN	P	L	0.067483	0.9475	0.880017	18	P404L	VKIYSSNSGL	VKIYSSNSG	10
PTEN	P	L	0.043543	0.922572	0.879029	17	P404L	KIYSSNSGL	KIYSSNSGP	9
PTEN	P	L	0.043543	0.922572	0.879029	16	P404L	IYSSNSGL	IYSSNSGPT	8
PTEN	P	L	0.043543	0.922572	0.879029	13	P404L	SNSGL	SNSGPTRRE	5
PTEN	P	L	0.02599	0.751036	0.725046	6	P404L	SNSGLTRREDKFMYFE	REDKFMYFE	16
PTEN	P	L	0.031251	0.920242	0.888991	4	P404L	LTRREDKFMYFEFP	DKFMYFEFP	14
PTEN	P	L	0.02887	0.86816	0.83929	3	P404L	RREDKFMYFEFPQ	KFMYFEFPQ	13
PTEN	P	L	0.035272	0.825003	0.789731	1	P404L	KFMYFEFPQPL	MYFEFPQPL	11
PTEN	P	L	0.043543	0.922572	0.879029	14	P404L	SSNSGL	SSNSGPTRR	6
PTEN	P	L	0.043543	0.922572	0.879029	15	P404L	YSSNSGL	YSSNSGPTR	7
PTEN	P	L	0.031167	0.868793	0.837626	7	P404L	YSSNSGLTRREDKFMYF	RREDKFMYF	17
SMAD4	P	L	0.270358	0.975569	0.705211	24	P186L	SLSTEGHSIQTIQHPL	SLSTEGHSI	16
SMAD4	P	L	0.039708	0.950572	0.910864	11	P312L	FQL	FQPPISNHP	3
SMAD4	P	L	0.089609	0.970378	0.880769	21	P186L	TEGHSIQTIQHPL	TEGHSIQTI	13
SMAD4	P	L	0.066592	0.96621	0.899618	18	P186L	HSIQTIQHPL	HSIQTIQHP	10
SMAD4	P	L	0.061356	0.962721	0.901365	17	P186L	SIQTIQHPL	SIQTIQHPP	9
SMAD4	P	L	0.061356	0.962721	0.901365	16	P186L	IQTIQHPL	IQTIQHPPS	8
SMAD4	P	L	0.061356	0.962721	0.901365	13	P186L	IQHPL	IQHPPSNRA	5
SMAD4	P	L	0.061356	0.962721	0.901365	11	P186L	HPL	HPPSNRAST	3
SMAD4	P	L	0.048545	0.895841	0.847296	7	P186L	QTIQHPLSNRASTETYS	NRASTETYS	17
SMAD4	P	L	0.061587	0.903931	0.842344	6	P186L	IQHPLSNRASTETYST	RASTETYST	16
SMAD4	P	L	0.06937	0.945669	0.876299	5	P186L	HPLSNRASTETYSTP	ASTETYSTP	15
SMAD4	P	L	0.051452	0.892842	0.84139	3	P186L	NRASTETYSTPAL	TETYSTPAL	13
SMAD4	P	L	0.036817	0.787547	0.75073	1	P186L	TETYSTPALLA	TYSTPALLA	11
SMAD4	P	L	0.124265	0.959643	0.835378	25	P312L	PHPGHYWPVHNELAFQL	PHPGHYWPV	17
SMAD4	P	L	0.036923	0.917401	0.880478	21	P312L	HYWPVHNELAFQL	HYWPVHNEL	13
SMAD4	P	L	0.026934	0.786622	0.759688	20	P312L	YWPVHNELAFQL	YWPVHNELA	12
SMAD4	P	L	0.039708	0.950572	0.910864	17	P312L	VHNELAFQL	VHNELAFQP	9
SMAD4	P	L	0.039708	0.950572	0.910864	16	P312L	HNELAFQL	HNELAFQPP	8
SMAD4	P	L	0.039708	0.950572	0.910864	15	P312L	NELAFQL	NELAFQPPI	7
SMAD4	P	L	0.03624	0.931479	0.895239	8	P312L	VHNELAFQLPISNHPAPE	PISNHPAPE	18
SMAD4	P	L	0.036291	0.930954	0.894663	5	P312L	FQLPISNHPAPEYWC	NHPAPEYWC	15
SMAD4	P	L	0.045206	0.955114	0.909908	4	P312L	LPISNHPAPEYWCS	HPAPEYWCS	14
SMAD4	P	L	0.037679	0.851851	0.814172	2	P312L	NHPAPEYWCSIA	APEYWCSIA	12
SMAD4	P	L	0.034241	0.911839	0.877598	7	P312L	NELAFQLPISNHPAPEY	ISNHPAPEY	17
SMAD4	P	L	0.037248	0.784827	0.747579	2	P186L	ASTETYSTPALL	ETYSTPALL	12
SMAD4	P	L	0.045387	0.919325	0.873938	8	P186L	SIQTIQHPLSNRASTETY	SNRASTETY	18
SMAD4	P	L	0.030679	0.891464	0.860785	19	P312L	WPVHNELAFQL	WPVHNELAF	11
SMAD4	P	L	0.033928	0.805818	0.77189	1	P312L	PAPEYWCSIAY	PEYWCSIAY	11
STK11	G	R	0.24277	0.874444	0.631674	12	G52R	YLMR	YLMGDLLGE	4
STK11	L	R	0.686814	0.144028	0.542786	6	L282R	CGPPRSDLLKGMLEYE	LLKGMLEYE	16
STK11	D	F	0.044716	0.682081	0.637365	8	D284F	GDCGPPLSFLLKGMLEYE	LLKGMLEYE	18
STK11	G	R	0.24277	0.874444	0.631674	17	G52R	KLIGKYLMR	KLIGKYLMG	9
STK11	G	R	0.24277	0.874444	0.631674	16	G52R	LIGKYLMR	LIGKYLMGD	8
STK11	G	R	0.24277	0.874444	0.631674	15	G52R	IGKYLMR	IGKYLMGDL	7
STK11	G	R	0.24277	0.874444	0.631674	14	G52R	GKYLMR	GKYLMGDLL	6
STK11	G	R	0.24277	0.874444	0.631674	13	G52R	KYLMR	KYLMGDLLG	5
STK11	G	R	0.24277	0.874444	0.631674	11	G52R	LMR	LMGDLLGEG	3
STK11	G	R	0.24277	0.874444	0.631674	10	G52R	MR	MGDLLGEGS	2
STK11	G	R	0.085533	0.58558	0.500047	6	G52R	KYLMRDLLGEGSYGKV	LGEGSYGKV	16
STK11	G	R	0.084931	0.610878	0.525947	3	G52R	LLGEGSYGKVKEV	GSYGKVKEV	13
STK11	L	R	0.64914	0.088504	0.560636	5	L282R	PPRSDLLKGMLEYEP	LKGMLEYEP	15
STK11	L	R	0.83761	0.235476	0.602134	4	L282R	RSDLLKGMLEYEPA	KGMLEYEPA	14
STK11	D	F	0.109277	0.930297	0.82102	25	D284F	GKGSYAIPGDCGPPLSF	GKGSYAIPG	17
STK11	D	F	0.101978	0.91058	0.808602	24	D284F	KGSYAIPGDCGPPLSF	KGSYAIPGD	16
STK11	D	F	0.080504	0.922779	0.842275	21	D284F	YAIPGDCGPPLSF	YAIPGDCGP	13
STK11	D	F	0.049612	0.802815	0.753203	20	D284F	AIPGDCGPPLSF	AIPGDCGPP	12
STK11	D	F	0.048583	0.799545	0.750962	19	D284F	IPGDCGPPLSF	IPGDCGPPL	11
STK11	D	F	0.061646	0.781744	0.720098	15	D284F	CGPPLSF	CGPPLSDLL	7
STK11	D	F	0.061646	0.781744	0.720098	11	D284F	LSF	LSDLLKGML	3
STK11	D	F	0.0523	0.75878	0.70648	7	D284F	CGPPLSFLLKGMLEYEP	LKGMLEYEP	17
STK11	D	F	0.097566	0.868902	0.771336	6	D284F	PPLSFLLKGMLEYEPA	KGMLEYEPA	16
STK11	D	F	0.03213	0.543254	0.511124	1	D284F	LEYEPAKRFSI	YEPAKRFSI	11
STK11	G	R	0.297839	0.85127	0.553431	21	G52R	RKRAKLIGKYLMR	RKRAKLIGK	13
STK11	G	R	0.326624	0.873454	0.54683	19	G52R	RAKLIGKYLMR	RAKLIGKYL	11
STK11	G	R	0.242655	0.836554	0.593899	20	G52R	KRAKLIGKYLMR	KRAKLIGKY	12
STK11	L	R	0.639782	0.11143	0.528352	7	L282R	GDCGPPRSDLLKGMLEY	DLLKGMLEY	17
STK11	D	F	0.061646	0.781744	0.720098	9	D284F	IPGDCGPPLSFLLKGMLEY	DLLKGMLEY	19
STK11	D	F	0.061646	0.781744	0.720098	16	D284F	DCGPPLSF	DCGPPLSDL	8
STK11	G	R	0.306118	0.894062	0.587944	18	G52R	AKLIGKYLMR	AKLIGKYLM	10
STK11	D	F	0.042282	0.765951	0.723669	3	D284F	LKGMLEYEPAKRF	LEYEPAKRF	13
TP53	P	L	0.198848	0.93601	0.737162	23	P278L	LLGRNSFEVRVCACL	LLGRNSFEV	15
TP53	R	L	0.234223	0.766723	0.5325	18	R273L	LLGRNSFEVL	LLGRNSFEV	10
TP53	S	F	0.086136	0.947128	0.860992	5	S99F	VPFQKTYQGSYGFRL	YQGSYGFRL	15
TP53	E	K	0.037873	0.840849	0.802976	12	E68K	RMPK	RMPEAAPPV	4
TP53	L	P	0.713014	0.032485	0.680529	25	L252P	YMCNSSCMGGMNRRPIP	YMCNSSCMG	17
TP53	R	C	0.611063	0.073385	0.537678	19	R333C	LDGEYFTLQIC	LDGEYFTLQ	11
TP53	M	M	0.886813	0.224152	0.662661	21	R333C	FTLQICGRERFEM	FTLQIRGRE	13
TP53	M	M	0.894002	0.250477	0.643525	18	R333C	QICGRERFEM	QIRGRERFE	10
TP53	M	M	0.864311	0.262527	0.601784	14	R333C	RERFEM	RERFEMFRE	6
TP53	M	M	0.864311	0.262527	0.601784	12	R333C	RFEM	RFEMFRELN	4
TP53	M	M	0.864311	0.262527	0.601784	11	R333C	FEM	FEMFRELNE	3
TP53	M	M	0.864311	0.262527	0.601784	10	R333C	EM	EMFRELNEA	2
TP53	M	M	0.864311	0.262527	0.601784	9	R333C	LQICGRERFEMFRELNEAL	MFRELNEAL	19
TP53	M	M	0.767956	0.224716	0.54324	8	R333C	ICGRERFEMFRELNEALE	FRELNEALE	18
TP53	E	K	0.053308	0.794054	0.740746	25	E285K	SFEVRVCACPGRDRRTK	SFEVRVCAC	17
TP53	E	K	0.078006	0.888795	0.810789	24	E285K	FEVRVCACPGRDRRTK	FEVRVCACP	16
TP53	E	K	0.04876	0.761607	0.712847	18	E285K	ACPGRDRRTK	ACPGRDRRT	10
TP53	E	K	0.049143	0.762881	0.713738	15	E285K	GRDRRTK	GRDRRTEEE	7
TP53	E	K	0.032287	0.786749	0.754462	4	E285K	KEENLRKKGEPHHE	RKKGEPHHE	14
TP53	E	K	0.037897	0.824066	0.786169	3	E285K	ENLRKKGEPHHEL	KKGEPHHEL	13
TP53	E	K	0.059128	0.837986	0.778858	2	E285K	LRKKGEPHHELP	KGEPHHELP	12
TP53	E	K	0.03315	0.746597	0.713447	1	E285K	KKGEPHHELPP	GEPHHELPP	11
TP53	R	T	0.716473	0.205414	0.511059	22	R280T	RNSFEVRVCACPGT	RNSFEVRVC	14
TP53	R	T	0.647658	0.142709	0.504949	21	R280T	NSFEVRVCACPGT	NSFEVRVCA	13
TP53	R	T	0.632264	0.099693	0.532571	20	R280T	SFEVRVCACPGT	SFEVRVCAC	12
TP53	R	T	0.7476	0.146389	0.601211	19	R280T	FEVRVCACPGT	FEVRVCACP	11
TP53	R	T	0.834368	0.172707	0.661661	13	R280T	ACPGT	ACPGRDRRT	5
TP53	R	T	0.834368	0.172707	0.661661	10	R280T	GT	GRDRRTEEE	2
TP53	P	L	0.196707	0.931672	0.734965	24	P278L	NLLGRNSFEVRVCACL	NLLGRNSFE	16
TP53	P	L	0.177085	0.938562	0.761477	21	P278L	GRNSFEVRVCACL	GRNSFEVRV	13
TP53	P	L	0.122265	0.914055	0.79179	20	P278L	RNSFEVRVCACL	RNSFEVRVC	12
TP53	P	L	0.126405	0.93318	0.806775	19	P278L	NSFEVRVCACL	NSFEVRVCA	11
TP53	P	L	0.129436	0.963614	0.834178	18	P278L	SFEVRVCACL	SFEVRVCAC	10
TP53	P	L	0.112916	0.957673	0.844757	17	P278L	FEVRVCACL	FEVRVCACP	9
TP53	P	L	0.112916	0.957673	0.844757	11	P278L	ACL	ACPGRDRRT	3
TP53	P	L	0.124487	0.954407	0.82992	8	P278L	FEVRVCACLGRDRRTEEE	GRDRRTEEE	18
TP53	R	L	0.203141	0.706515	0.503374	16	R273L	GRNSFEVL	GRNSFEVRV	8
TP53	R	L	0.203141	0.706515	0.503374	15	R273L	RNSFEVL	RNSFEVRVC	7
TP53	R	L	0.203141	0.706515	0.503374	14	R273L	NSFEVL	NSFEVRVCA	6
TP53	R	L	0.203141	0.706515	0.503374	13	R273L	SFEVL	SFEVRVCAC	5
TP53	R	L	0.203141	0.706515	0.503374	12	R273L	FEVL	FEVRVCACP	4
TP53	R	L	0.208025	0.771199	0.563174	3	R273L	CACPGRDRRTEEE	GRDRRTEEE	13
TP53	L	P	0.653641	0.03131	0.622331	24	L252P	MCNSSCMGGMNRRPIP	MCNSSCMGG	16
TP53	C	F	0.030585	0.715439	0.684854	5	C242F	SSFMGGMNRRPILTI	MNRRPILTI	15
TP53	C	F	0.042853	0.921032	0.878179	4	C242F	FMGGMNRRPILTII	NRRPILTII	14
TP53	C	F	0.038214	0.87408	0.835866	3	C242F	GGMNRRPILTIIT	RRPILTIIT	13
TP53	S	I	0.157437	0.76526	0.607823	25	S215I	GNLRVEYLDDRNTFRHI	GNLRVEYLD	17
TP53	S	I	0.050605	0.612299	0.561694	16	S215I	DRNTFRHI	DRNTFRHSV	8
TP53	S	I	0.050605	0.612299	0.561694	15	S215I	RNTFRHI	RNTFRHSVV	7
TP53	S	I	0.050605	0.612299	0.561694	14	S215I	NTFRHI	NTFRHSVVV	6
TP53	S	I	0.050605	0.612299	0.561694	13	S215I	TFRHI	TFRHSVVVP	5
TP53	S	I	0.050605	0.612299	0.561694	11	S215I	RHI	RHSVVVPYE	3
TP53	S	I	0.050605	0.612299	0.561694	10	S215I	HI	HSVVVPYEP	2
TP53	S	I	0.050605	0.612299	0.561694	9	S215I	YLDDRNTFRHIVVVPYEPP	SVVVPYEPP	19
TP53	S	I	0.050471	0.578644	0.528173	7	S215I	RNTFRHIVVVPYEPPEV	VVPYEPPEV	17
TP53	S	I	0.050944	0.687343	0.636399	4	S215I	IVVVPYEPPEVGSD	YEPPEVGSD	14
TP53	Y	C	0.959288	0.066028	0.89326	25	Y205C	APPQHLIRVEGNLRVEC	APPQHLIRV	17
TP53	Y	C	0.941178	0.039855	0.901323	21	Y205C	HLIRVEGNLRVEC	HLIRVEGNL	13
TP53	Y	C	0.939126	0.03198	0.907146	19	Y205C	IRVEGNLRVEC	IRVEGNLRV	11
TP53	Y	C	0.933234	0.030233	0.903001	18	Y205C	RVEGNLRVEC	RVEGNLRVE	10
TP53	Y	C	0.924504	0.028676	0.895828	15	Y205C	GNLRVEC	GNLRVEYLD	7
TP53	Y	C	0.924504	0.028676	0.895828	14	Y205C	NLRVEC	NLRVEYLDD	6
TP53	Y	C	0.924504	0.028676	0.895828	11	Y205C	VEC	VEYLDDRNT	3
TP53	Y	C	0.852542	0.032111	0.820431	6	Y205C	LRVECLDDRNTFRHSV	DRNTFRHSV	16
TP53	F	F	0.94386	0.420564	0.523296	13	Y205C	DRNTF	DRNTFRHSV	5
TP53	Y	C	0.935402	0.029153	0.906249	5	Y205C	VECLDDRNTFRHSVV	RNTFRHSVV	15
TP53	F	F	0.94386	0.420564	0.523296	12	Y205C	RNTF	RNTFRHSVV	4
TP53	Y	C	0.955099	0.033569	0.92153	4	Y205C	CLDDRNTFRHSVVV	NTFRHSVVV	14
TP53	F	F	0.94386	0.420564	0.523296	11	Y205C	NTF	NTFRHSVVV	3
TP53	Y	C	0.95528	0.037402	0.917878	3	Y205C	DDRNTFRHSVVVP	TFRHSVVVP	13
TP53	F	F	0.94386	0.420564	0.523296	10	Y205C	TF	TFRHSVVVP	2
TP53	Y	C	0.794721	0.027266	0.767455	1	Y205C	TFRHSVVVPYE	RHSVVVPYE	11
TP53	F	F	0.89965	0.396241	0.503409	8	Y205C	ECLDDRNTFRHSVVVPYE	RHSVVVPYE	18
TP53	R	L	0.293168	0.817277	0.524109	5	R158L	RVLAMAIYKQSQHMT	IYKQSQHMT	15
TP53	R	L	0.184566	0.721483	0.536917	4	R158L	LAMAIYKQSQHMTE	YKQSQHMTE	14
TP53	R	L	0.150101	0.661632	0.511531	2	R158L	IYKQSQHMTEVV	QSQHMTEVV	12
TP53	S	F	0.454466	0.971733	0.517267	24	S99F	APAPAPSWPLSSSVPF	APAPAPSWP	16
TP53	S	F	0.374814	0.970371	0.595557	22	S99F	APAPSWPLSSSVPF	APAPSWPLS	14
TP53	S	F	0.169607	0.958779	0.789172	20	S99F	APSWPLSSSVPF	APSWPLSSS	12
TP53	S	F	0.288737	0.96679	0.678053	18	S99F	SWPLSSSVPF	SWPLSSSVP	10
TP53	S	F	0.240479	0.963743	0.723264	17	S99F	WPLSSSVPF	WPLSSSVPS	9
TP53	S	F	0.240479	0.963743	0.723264	16	S99F	PLSSSVPF	PLSSSVPSQ	8
TP53	S	F	0.043393	0.746207	0.702814	2	S99F	YQGSYGFRLGFL	SYGFRLGFL	12
TP53	E	K	0.044386	0.642594	0.598208	25	E68K	QWFTEDPGPDEAPRMPK	QWFTEDPGP	17
TP53	E	K	0.057325	0.734862	0.677537	24	E68K	WFTEDPGPDEAPRMPK	WFTEDPGPD	16
TP53	E	K	0.053001	0.760075	0.707074	23	E68K	FTEDPGPDEAPRMPK	FTEDPGPDE	15
TP53	E	K	0.044904	0.785879	0.740975	22	E68K	TEDPGPDEAPRMPK	TEDPGPDEA	14
TP53	E	K	0.03728	0.8335	0.79622	18	E68K	GPDEAPRMPK	GPDEAPRMP	10
TP53	E	K	0.037873	0.840849	0.802976	14	E68K	APRMPK	APRMPEAAP	6
TP53	E	K	0.037873	0.840849	0.802976	13	E68K	PRMPK	PRMPEAAPP	5
TP53	E	K	0.037873	0.840849	0.802976	11	E68K	MPK	MPEAAPPVA	3
TP53	E	K	0.035856	0.771353	0.735497	8	E68K	PDEAPRMPKAAPPVAPAP	AAPPVAPAP	18
TP53	E	K	0.040126	0.819102	0.778976	7	E68K	EAPRMPKAAPPVAPAPA	APPVAPAPA	17
TP53	E	K	0.055742	0.929674	0.873932	3	E68K	APPVAPAPAAPTP	APAPAAPTP	13
TP53	E	K	0.044486	0.769968	0.725482	1	E68K	APAPAAPTPAA	APAAPTPAA	11
TP53	S	F	0.240479	0.963743	0.723264	15	S99F	LSSSVPF	LSSSVPSQK	7
TP53	Y	C	0.924504	0.028676	0.895828	10	Y205C	EC	EYLDDRNTF	2
TP53	F	F	0.94386	0.420564	0.523296	17	Y205C	ECLDDRNTF	EYLDDRNTF	9
TP53	E	K	0.049143	0.762881	0.713738	11	E285K	RTK	RTEEENLRK	3
TP53	P	L	0.096452	0.963077	0.866625	4	P278L	LGRDRRTEEENLRK	RTEEENLRK	14
TP53	S	F	0.240479	0.963743	0.723264	9	S99F	PSWPLSSSVPFQKTYQGSY	SQKTYQGSY	19
TP53	S	F	0.05835	0.881323	0.822973	6	S99F	SSVPFQKTYQGSYGFR	TYQGSYGFR	16
TP53	S	F	0.057019	0.897548	0.840529	7	S99F	LSSSVPFQKTYQGSYGF	KTYQGSYGF	17
TP53	E	K	0.049478	0.749506	0.700028	19	E285K	CACPGRDRRTK	CACPGRDRR	11
TP53	R	T	0.834368	0.172707	0.661661	14	R280T	CACPGT	CACPGRDRR	6
TP53	P	L	0.112916	0.957673	0.844757	12	P278L	CACL	CACPGRDRR	4
TP53	E	K	0.037873	0.840849	0.802976	9	E68K	PGPDEAPRMPKAAPPVAPA	EAAPPVAPA	19
TP53	C	F	0.036447	0.756441	0.719994	2	C242F	MNRRPILTIITL	RPILTIITL	12
TP53	M	M	0.85366	0.273212	0.580448	19	R333C	LQICGRERFEM	LQIRGRERF	11
TP53	S	I	0.050605	0.612299	0.561694	12	S215I	FRHI	FRHSVVVPY	4
TP53	Y	C	0.863739	0.032099	0.83164	2	Y205C	RNTFRHSVVVPY	FRHSVVVPY	12
TP53	F	F	0.94386	0.420564	0.523296	9	Y205C	RVECLDDRNTFRHSVVVPY	FRHSVVVPY	19
TP53	S	F	0.419865	0.969635	0.54977	23	S99F	PAPAPSWPLSSSVPF	PAPAPSWPL	15
TP53	M	M	0.864311	0.262527	0.601784	16	R333C	CGRERFEM	RGRERFEMF	8
TP53	Y	C	0.924504	0.028676	0.895828	17	Y205C	VEGNLRVEC	VEGNLRVEY	9
TP53	S	F	0.344788	0.960961	0.616173	25	S99F	AAPAPAPSWPLSSSVPF	AAPAPAPSW	17
TP53	S	F	0.240479	0.963743	0.723264	13	S99F	SSVPF	SSVPSQKTY	5
TP53	S	F	0.058071	0.883922	0.825851	3	S99F	KTYQGSYGFRLGF	GSYGFRLGF	13
NOTCH1	L	R	0.69927	0.124022	0.575248	17	L1600R	FLRELSRVR	FLRELSRVL	9
NOTCH1	L	R	0.745067	0.184505	0.560562	20	L1600R	SFHFLRELSRVR	SFHFLRELS	12
NOTCH1	L	R	0.716203	0.125074	0.591129	18	L1600R	HFLRELSRVR	HFLRELSRV	10
NOTCH1	L	R	0.69927	0.124022	0.575248	15	L1600R	RELSRVR	RELSRVLHT	7
NOTCH1	L	R	0.69927	0.124022	0.575248	13	L1600R	LSRVR	LSRVLHTNV	5
NOTCH1	L	R	0.69927	0.124022	0.575248	12	L1600R	SRVR	SRVLHTNVV	4
NOTCH1	L	R	0.653477	0.115466	0.538011	4	L1600R	RHTNVVFKRDAHGQ	VFKRDAHGQ	14
NOTCH1	L	R	0.585294	0.082922	0.502372	1	L1600R	FKRDAHGQQMI	RDAHGQQMI	11
NOTCH1	L	R	0.69927	0.124022	0.575248	10	L1600R	VR	VLHTNVVFK	2
NOTCH1	L	R	0.69927	0.124022	0.575248	11	L1600R	RVR	RVLHTNVVF	3

## Sheet: Suppl. Table 4
Supplementary table 4: Output from NetMHC for the HLA-binding affinity of mutated epitope fragments. For every single fragment, the affinity to a HLA supertype is calculated by rank correlation. The average rank for every peptide across all 12 HLA supertypes was also calculated. Based on their rank, a fragment may considered as "N_Binder", which means the fragment has a high probability to intera…
Mutated peptide	H_Avg_Ranks	N_binders_mutant	HLA-A0101	HLA-A0201	HLA-A0301	HLA-A2402	HLA-A2601	HLA-B0702	HLA-B0801	HLA-B1501	HLA-B2705	HLA-B3901	HLA-B4001	HLA-B5801
WLHKRGEYIKTC	24427	0	34244.9	16276.8	16293.2	40622.2	34405.7	41540.1	5797.3	34104.7	16539.7	38206.3	35604.3	34757.4
PRYFLLKNDGTFI	5184	1	28070.6	909.9	24759.9	358.3	33347.6	35734.7	17379.2	21023.9	5880.8	39021.8	33403.5	34489.9
KEGWLHKRGEYIKT	28817	0	33801.3	26839.5	15714.4	32942.7	36088.7	40464.8	12580.6	34713	28412.2	39975.2	18345.3	33614.5
HKRGEYIKTC	39021	0	40769.3	38666.2	41389.8	43693.9	36169.2	38355.4	19861	35774.6	9447.3	35582	36455.2	30128.2
CRPRYFLLKNDGTF	2129	2	28290.1	21985.2	25990.5	238.1	32212	91.2	14468.3	11252.2	1427	37375.5	34249.7	36454.5
YFLLKNDGTFIG	19613	0	30364.5	3062.2	31354.8	5337	32210.3	40086.5	20818.2	21722.3	32624.2	36505.4	37130	32074.6
MSDVAIVKE	23254	0	19864.3	29826.6	29599.6	44412.7	28127.5	33121.7	31763.5	35951.1	35141.2	29132.6	22473.4	8611.3
RPRYFLLKNDG	28163	0	38229.9	34599.8	37967.3	29057.3	40271.7	9948.6	32649.9	39812.9	8523.2	41706.7	40493.7	38178.2
IVKEGWLHKRGEYI	12635	0	28003.3	14458.1	13288.4	25732.7	12160.9	36759.8	6541.4	8511.3	30739.7	35047.4	9778.4	31301.2
LHKRGEYIKTC	63189	0	41944.7	40573.9	39976.5	41247.6	38668.8	43106.9	28678.5	41931.6	22713	38069.7	40266.5	34978.8
GWLHKRGEYIKTC	25108	0	34612.5	18274.8	18697.8	29654.1	36691.5	42371.2	5391.7	36873	19281.9	38365.4	36467.9	35015.9
RGEYIKTC	68669	0	40770.2	40479.2	41836	42246.3	43585.8	39746.2	32403.6	39468.9	26043.1	40029.7	37267.2	35512.3
IGDFGLATVE	48651	0	37972.2	16631.6	32000.5	41204.8	36112.9	34736.3	32615.3	30992.8	39615.2	40851.4	32369.2	22112.8
TVKIGDFGLATVE	33779	0	34526.9	5453.6	27560.2	41672.9	23815.3	32040	31235.2	33956.7	36193.9	34508.9	38046.2	34247.5
VKIGDFGLATVE	39838	0	36639.1	4880.1	27154.1	40920.9	34624.9	34900.2	34386.7	35644	33413.3	34641	37705.7	36000.9
KIGDFGLATVE	37782	0	36300.2	3383.3	25667.7	41253	38355	33176.3	36013.4	32924.5	35906	37994	38130.3	31976.6
ESRWSGSHQFEQLS	14570	0	23224.7	35356.3	36809.6	8877.6	26411.4	35477	19210.9	27421.3	3251.2	15415.3	33323.4	25080.7
SGSHQFEQLSGS	68150	0	38835.6	32835.9	41723.9	45119.3	37878.2	40939.1	34971.3	30420.1	33847	39295.9	36921.7	30723.4
KVLGSGAFGTV	23527	0	31822.7	1405	23219.4	30923.5	34143.1	20443.4	31633.5	25990.7	30720.4	38636.9	35965.1	27559.9
KIKVLGSGAFGT	33154	0	33950.5	14250.6	28415.3	39704.9	28549	26295.1	30406.6	9484.1	27204.1	36887.3	38159.2	32430.6
APNQALLRILKEI	13060	0	34981.5	6445.9	7828.8	37139.2	35578.1	2039.3	16685.9	34713.8	12058.7	29941.7	35185	31651
ALLRILKEI	7810	1	26770.8	121.7	19135	20238.5	27755	18202.4	8801	17611.9	11473.8	30569.9	23620.8	16973
LLRILKEI	23325	0	32706.2	6854.1	32710.4	35054.6	36908.1	27730.1	4396.3	27251.5	31013.3	41842.3	36533	33924.4
FKKIKVLGSGAFG	22892	0	35468.5	26685.8	28555.2	37394.9	23886.2	30985.8	5907.3	12575.8	21098.9	30952.6	36458.8	37568.4
VKIPVAIKELT	49839	0	37318.5	28745.6	36264.8	40889	36704.2	28768.9	33251.4	39835.7	26725.3	30942.2	35771.1	37448.7
KIPVAIKELT	32997	0	35849	19470.6	27947	35496.2	35525.8	12690.9	33187	33194.6	34473.5	40588.4	37442.2	20005.8
ATSPKANKEILDE	31673	0	38652.8	39468.9	34369.2	39202.5	39592.1	8422.7	18849.6	40040.6	38849.1	38174.5	37841.8	21850
SPKANKEILDEA	38824	0	39539.9	30048.8	40354.1	47060.4	40967	10485	21638.5	40923.1	39580.5	38626.1	37426.4	29029.3
GAEEKEYHAER	57678	0	42296.1	42838.7	36663.3	47881.2	40186.4	43315.9	37297.1	42981.6	39101.3	41731.5	19237.5	35672.9
AEEKEYHAER	30225	0	41937	42647.7	30121.4	46211.2	37314	41170.9	34976.9	34215.6	39598.5	40984.2	6651	38444.7
EAPNQALLRILKEI	16427	0	34827.8	7192.1	9222.5	36717.3	30434.2	4590.6	16325.8	35156.8	20828.8	30637.1	35419.9	25980.6
IPVAIKELT	31318	0	29858.5	31576.7	36961.2	42154.9	29692.3	9578.2	30228.5	38136.1	34781.1	33298.5	32621.7	24073.3
IEFKKIKVLGSGAF	8181	1	32186.2	29857.6	27651	17124.6	19648.4	28115.9	2118.4	2226.7	25938.8	31736.7	2589.9	37479.5
KANKEILDEAY	15807	0	11491.6	31327	11726.1	46624.5	36576.5	39269.1	36716.1	4960.3	31272.1	39800.8	36224.4	8644.9
EKVKIPVAIKELT	26510	0	36804.4	29821.1	16577.5	42035.2	32510	29429.7	24924.1	33033	31521.4	12324.1	36689.5	36829.1
HFKDGPNCVEKCL	16654	0	32765.6	34504.5	24783.5	37570.9	39448.4	16944.6	15637.9	35700.7	32482.6	4514.7	34545.9	33387.3
FKDGPNCVEKCL	15005	1	34274.9	33481	34149.8	43001.7	38619.4	19745.1	17131.3	37841.8	26813.4	3980.9	34245.6	35635.1
GPNCVEKCL	14260	0	25936.5	33820.7	35273	45561.3	32245.5	3261	11299	32775.6	26967.9	11048	25514.6	22855.5
GLQGANSFIFKYA	8379	1	21557.9	8780.5	431.8	16962.6	25561.5	40469.6	26651.7	6810.2	20176.8	35937.1	33240.6	13327.1
ANSFIFKYADP	70309	0	32940.9	32677.1	38361.2	37469	38008.8	43119.1	35421.8	39863.3	43919.5	41570.2	38248.9	34553.8
LDGLQGANSFIFKY	6331	1	11029.5	20466.6	501.9	10690.1	21676	40577.9	29325.5	2892.5	23758.9	36270.7	33146.1	3643.5
HVLMGHVAAVG	9262	0	32000.1	412.6	25357.4	37807	7239.8	9691.7	12595	20068.4	34421.3	18938.7	38063.1	34480.2
VQYDGRRVVSGAY	5991	1	20492.3	23456.2	9299	38141.4	21054.4	31760	25067.2	81.8	13253.4	35739.7	28806.3	35792
LPANASTVVGGDVK	19682	0	32047.2	36086	15321.4	45429.4	33231.9	2556.9	24491	37496.6	39704.5	33587.6	35433.7	24047.8
SSSSGDDF	32198	0	23115.4	42404.3	41854.1	30977.1	37185.9	38663.7	38424.3	16259.2	39454.8	41108.6	31114.1	10117
FAHDLLPPAPPSS	47958	0	39158	15383.3	37369.8	43925.2	32963.7	39192.7	34710.8	35267.6	32675.4	28027.2	38064.3	32034.8
SSGDDSVFT	35497	0	24084.5	19664.5	34904	42201.9	31483.9	32100	34198.6	26793.9	34809.3	34245.2	32376.3	18012.7
FVDEYDPTIEDSYS	4227	1	509.3	9011.7	33824.3	40853.2	19773.1	41182.1	38998.2	26040.3	38682.5	34721.3	32008.4	32498.4
KDSEDVPMVLVGNN	38887	0	24972.1	33154	31408.7	42249	36896.5	28252.8	35611.2	39146.1	37552.6	34545.5	23117.1	25509.3
SEDVPMVLVGNN	54716	0	38871.8	33590.2	36325.3	45240.1	36536.2	29068.6	40048.8	39886.2	41880.4	39628.1	23111.4	38406.1
NCDLPSRTVDTKQA	52928	0	36179	35902.9	30875.7	46240.7	38999	22945.2	31266.7	42650.9	27611.5	40294.8	39982.6	32784.5
RTVDTKQAQDL	32517	0	25734.7	34183	35679.1	38342.5	38036.8	16256.4	24683.9	22561.1	30014.7	34016.6	29980.3	26494.7
TIEDSYRKQVVIV	19489	0	29739.9	21463.6	27022.2	19486.2	36307.2	35769.5	18799.3	33635.3	36197.4	34753.6	6272.4	17864.8
IEDSYRKQVVIV	18608	0	30014.7	26410	29156.2	18046.3	38117.9	41092.2	25066.9	35031.5	35684.1	37221.3	5524.3	12554.1
YRKQVVIV	14406	0	32976.2	25694.9	39329.5	25302.9	37716.7	34517.9	4098.9	30807.3	2182	16424.4	37156.5	36053.6
VGETCLLDILDTAG	11364	1	25781.5	4085.1	36449.3	41640.4	37734.7	40860.7	34731.4	39232.6	39124.1	40324	1263.5	36088.7
LDILDTAGQEE	86781	0	37735.1	39395.5	43789.5	47157.3	35532.7	42732.6	42158.1	41815.6	43761.1	43072.9	35756.4	41259.2
VDEYDPTIEDSYS	63876	0	29340.7	37504.3	36104.3	40305.7	33506.7	41211.5	40821.8	36452.1	42320.4	40716.9	34806.7	37107.1
DPTIEDSYS	66611	0	31373.1	43349.2	45186.8	47647.6	30221.9	33998.6	35384.2	43517	41122.4	38310.6	38585.2	35043.6
YDPTIEDSYS	65869	0	33217.6	38424.8	41522.5	42430.9	32996.9	34468.3	36719.7	27686.3	42450.6	43645.7	38093.2	34507.1
EKISELGAGNGGV	24703	0	28568.5	9069.8	28734.1	45532.8	30884	38873.5	37531.9	35163.6	35787.3	36573	8478.8	32794.7
ISELGAGNGGVV	20458	0	28151.2	21672	35527.3	42848.4	29817.2	31138.4	31179.9	30616.2	40008.5	33612	4151.3	31208.5
ELGAGNGGVVF	27978	0	29646.7	31593.5	33485.7	31025	23654.8	32443.2	24169.9	4241.7	36856.2	36111	34395.6	32666.2
KQEKDFLWSHRHYC	18293	0	25278.8	6287.6	16852.8	38821.8	34844.4	38680.9	16698	4404.3	12122	33659.3	20109.7	29492.5
KAISTRDPLSEITK	16446	0	32079.2	28618.6	1577.4	40489.7	38326.4	20425.1	32410.9	36492.3	25525.9	31835.4	35118	14217.8
AISTRDPLSEITK	18403	0	32536	27492	1347	40178.6	37083	25964.9	35690.7	38243.1	27391.9	35437.5	39914.3	21017.1
ISTRDPLSEITK	19198	0	32631.9	35005.7	1650.6	38723.2	37676.3	32821.7	40186	39932.4	26133.1	35555.8	39961.4	10744.5
TRDPLSEITK	34780	0	38435.6	37580.6	19829.1	45128.6	37275.7	36102.8	37913.9	42653.2	7539	31948.2	38044.6	29203.6
EKDFLWSHRHYCV	3783	2	22516.3	42.6	23196.8	13816.5	33336.4	38913.4	464.7	26856.6	29881.2	27858.8	36424.1	34619.6
DFLWSHRHYCVT	8906	1	24624.4	178.2	28930.3	19943.7	32903.1	36640.3	1793.1	35498.5	36210.3	33938	38430.2	34973.5
LWSHRHYCVTI	8204	1	21688.2	23724.5	33377.9	878.9	33935	39828.8	3997.5	25766.5	27978.4	30589.7	31376.1	28699.3
ACGMYLKHLNRQVK	4250	1	33726.4	13183.9	73.3	17649.9	37586.3	39068.3	19909	35999.4	26308.2	36934.1	36550.8	36948.8
CGMYLKHLNRQVK	3261	1	33533.2	12038.2	63.9	17010.2	37265.2	38396.5	20045	35280.2	19897	36776.6	37516.1	36113.3
MEKLINLTDILKQ	8187	2	31551.5	9316.1	677	38507.6	29632	37688.5	19482.4	30970.1	29867	26491.3	2345.8	36653.4
STRDPLSEITK	19950	0	32907.8	35284.4	1125	46632.6	36531.1	28914.9	40185.5	40286.9	24119.2	35200.5	39575.8	34839.1
EDKFMYFEFPQP	39286	0	32654.2	16922.4	24245.6	22034.2	31715.7	41756.8	31899.2	33750.1	39802.6	36653.4	34127.2	37973.4
CQLKVKIYSSNSGL	5331	1	26666.7	11790.7	21060.8	34294.5	29935.5	30884.4	255.2	11186.5	7851.8	22068.1	23793.4	36065.7
QLKVKIYSSNSGL	6498	1	26831.1	10740.2	20739.7	39059.4	29613.4	30119.8	370.7	20245.5	27556	22110.7	33269	36849.4
KVKIYSSNSGL	26078	0	28235.4	18145.6	18147.1	40554.2	36165.7	21704.2	18894.7	20517.6	27830.5	21391.5	33543.3	31141.4
VKIYSSNSGL	13088	0	25224.4	6164	11681.4	31576	27034.2	16699.8	14634.4	3851.5	11398.2	16026	23115.4	27488.7
KIYSSNSGL	5189	0	20147.2	415.3	2736.1	24917.1	22433.8	2100.8	16476.3	1066.3	13671.1	9074.2	16318.1	5365.6
IYSSNSGL	22788	0	28325.1	23253.8	33287.7	5231.9	32541.7	32334.6	27336	27179.7	34679.3	30556.3	31793.1	30636.8
LTRREDKFMYFEFP	8762	0	12946.4	20291.6	24048.3	8909.3	15929.1	32125	10316.8	18009.8	4543.2	34508.6	5231.9	19075.9
RREDKFMYFEFPQ	8794	1	30838	29014.3	31032.8	7490.2	33892.5	36711.7	26462.6	30826	505.4	32687.4	6950.5	32255.6
KFMYFEFPQPL	2155	3	18005.3	20	20557.6	2195.4	29967.3	30806.3	1820.2	6004.3	23479.6	2060.7	23680.9	24380
TEGHSIQTIQHPL	9342	1	23613.1	20655.3	33142.5	36293.9	30483.7	32991.2	8989.2	18332.8	32340.9	8618.4	2012.8	23369.3
HSIQTIQHPL	3412	2	16364.4	6017.5	23402.2	29167.9	7489.1	11747.8	2157.2	195.2	12682.8	4715	12318.2	719.3
SIQTIQHPL	3207	2	16705.4	404.6	21900.2	15395	16604.3	2560.6	961.6	3198.4	15800.8	909.8	18714.6	11106.9
IQTIQHPL	14122	0	29512	15125.5	34745.7	30902.4	35451.7	33924	6502.7	9652.9	9534.8	13212.6	14190.7	25805.8
NRASTETYSTPAL	4572	2	12179.6	31528.3	30148.8	32213.8	34811.2	11454.3	13533.2	21542.7	5224.5	2551.2	521.2	17368.3
TETYSTPALLA	10905	0	8428.7	26941.1	27430.8	19994.9	28518.8	36407.1	32393.8	36684	36262.5	18795.8	4747	26432
GHYWPVHNELAFQL	5984	2	31737.7	16621	27874.5	1142	31548	4342.4	12580.9	27004.1	23552.1	3034.8	28613.4	27895.3
HYWPVHNELAFQL	5446	2	31483.2	15185	30547.7	872.8	28715.4	3820.8	12851.3	24925.5	20763.3	2783.8	30571.9	24562.2
YWPVHNELAFQL	4643	2	33286.6	15512.7	36185.3	549.7	26649.1	3000.8	13356	21591.5	18729.6	2546.9	31839.2	28607.8
VHNELAFQL	1588	1	25188.7	17339.2	32239.9	4136.3	28722.9	24662.3	22927.8	29521.6	16665.5	61.1	15777.3	9209
HNELAFQL	17501	0	34349.5	27184.7	38631.5	34090.3	38632.4	36700.6	16083.2	35538.1	29731.9	4573.7	27580.8	21650.2
LPISNHPAPEYWCS	8747	1	23477.3	36895.7	27834.4	37485.6	29304.5	13871.9	27537.2	26822.1	37345.5	35432.9	39815.9	478.4
NHPAPEYWCSIA	20930	0	33144.7	34851.9	37630.7	24083.5	33602.2	5014.2	22759	40548.9	41252.1	15411.5	39596.8	34716
ASTETYSTPALL	8165	1	9442.9	15379.7	17415.8	32003.9	26308.2	29156.2	16949.9	25641	31900.6	20085.4	1751	13937.4
WPVHNELAFQL	10007	1	34236.3	24960.3	37973.4	29532.4	29263.3	1304.8	14811.2	38956.8	31219	4777.1	33537.5	28590.5
PAPEYWCSIAY	14293	0	18913.5	27719.6	9900.2	39940.6	21644.4	12766.9	38075.1	10229.3	36226.8	31306.3	7540.5	37212.4
KLIGKYLMR	4688	1	25684.3	10119.6	123.8	27704.6	22793	29379.1	28693.7	25939.3	6773.7	31380.9	26167.9	26868.9
LIGKYLMR	41823	0	34745.3	26701.4	13909.7	40030.2	30911.1	41482.6	21362.6	37462.1	35253.9	40946.6	37913.1	37580.6
LLGEGSYGKVKEV	16697	0	32133	526.1	13472.1	41390.7	35177.7	40608.6	20629.6	31210.6	36546.1	40993.1	13557.2	33202.8
RSDLLKGMLEYEPA	2974	1	274.2	5478	3053.4	38734.1	29779.2	34663.5	16884.9	17938.5	24693.2	37945.1	34760	10335.9
YAIPGDCGPPLSF	6688	1	26778.9	17739.6	24609.8	14744.3	17178.3	3292.3	21920.3	297.4	27652.2	16594.2	28455	3389.7
AIPGDCGPPLSF	16680	0	33838.6	22538.9	22757.3	22476.1	19795.8	3806.2	28745.2	8290.4	35964.7	34166.8	36773.8	34037.6
IPGDCGPPLSF	26129	0	33907.5	33562.9	36396.5	31833.7	38091.9	4319.3	28902.1	27492.3	36299.8	35206.3	37750.6	35840.8
LEYEPAKRFSI	15635	0	35502.3	27868.2	32720	6830.8	34520.9	37182.3	19505	30277.6	32373.8	36966.5	3963.4	33431.4
RKRAKLIGKYLMR	5829	1	35429.4	24510.1	1667.4	35406.8	32563.1	22030.4	14259.5	30244.2	192.1	33698.7	37522.1	31041.5
RAKLIGKYLMR	17639	0	35426	24103.3	2193	36940	32458.7	24918.4	18051.4	28948.4	9593	35716.6	37132	21784.6
KRAKLIGKYLMR	5301	1	35329.5	24539	2076.9	33941.6	33889.9	29155.3	16915.8	32181.7	133.7	32834.9	37723.2	28445.1
DCGPPLSF	65088	0	35251.6	37021.7	39458.2	31949.6	38904.2	42964.9	37568.4	30940.9	39134.7	39181.7	38840.2	35113.8
AKLIGKYLMR	10395	1	33846.3	16145.1	513.6	38516.3	23969.3	33286.3	25445.9	34319.8	10280.9	33552.4	35152.6	29209.9
LKGMLEYEPAKRF	18456	0	26787.9	20778.1	6231.4	15657.2	34811.9	38872.2	25090.5	12596.7	19178.1	38308.1	17479.6	35485.1
LLGRNSFEVL	3827	2	24531.1	834.3	22274.2	7756.5	29285.2	9785.4	762.6	80.6	29441.5	35238.7	26749.1	16706.3
LDGEYFTLQIC	29924	0	33866.1	28281.3	35182.3	34597.9	36282.5	42781.7	32497.3	36430.4	39907.8	41550.4	7628.8	39412.6
FTLQICGRERFEM	12654	0	28740.3	2164.1	31356.1	27415.7	11394.6	24869.7	16294.6	5776.1	16575.6	32675	20027.9	19955.2
QICGRERFEM	24321	0	35063.7	15441.2	29191.2	34975.4	24313.1	23957.2	10131.3	14597	34017.7	35114.2	32338.4	19216.7
ACPGRDRRTK	41158	0	44074.7	44209.4	22191.2	45473.2	41927.1	11839.8	33059.4	43975.6	35452.1	43932.4	37847.5	33515.8
KEENLRKKGEPHHE	36964	0	42307.6	40947	31976.9	46825.3	40118.6	38288.6	10895.1	32938.8	22483.9	41781.7	20557.6	36185.7
ENLRKKGEPHHEL	2000	1	37104.3	20607.3	34653.4	40669.7	38404	22173.7	55.3	30255.6	21559.5	32158	34349.9	35975.6
LRKKGEPHHELP	37984	0	41337.9	42856.7	40363.3	41672.9	41878.1	36274.3	10679.5	39136.8	13078.9	34584.1	36785.7	35828.4
KKGEPHHELPP	61679	0	42654.1	43058.9	40340.6	43954.7	43094.8	39692.9	34111.4	41744.6	32086.1	35185	26435.7	34847.4
RNSFEVRVCACPGT	18831	0	33028	26098.1	34775.4	41588.7	34645.9	31721.6	30198.7	27378.9	1512.6	37935.2	17542.1	30275.9
NSFEVRVCACPGT	32774	0	32845.9	24750.8	39919	41718.4	33111.3	38146.8	30247.8	34026.6	14938.2	37282.6	17498.5	28453.1
SFEVRVCACPGT	32734	0	34846.2	29593.5	40012	40469.6	34630.5	37740.4	32269.6	33370.7	11450.4	39021.4	16960.7	37801.7
FEVRVCACPGT	27990	0	35134.3	28222.9	40649.1	45947.5	33224	39116.1	32902.1	31051.6	6492.6	39231.8	15513	38823.4
GRNSFEVRVCACL	11073	0	27493.8	14164.5	31670.8	27844	36471.8	36312.3	8267.7	32264.7	2381.2	28825.6	3223.7	31372.7
RNSFEVRVCACL	14046	0	27425.2	13377.9	30508.1	26306.5	35917.7	33609.5	8417.1	28357.5	25948.3	28724.4	3694.1	28567
NSFEVRVCACL	18156	0	27357.6	11551.5	34485.8	26345.2	33391.6	34408.6	8926.8	28878.4	35435.6	28228.7	8168.7	26270.9
SFEVRVCACL	7102	1	25129.4	10867.7	30001.4	9176.5	30082.3	29141.1	2716.2	16082.1	33472.3	25101.9	933	25597.8
FEVRVCACL	1423	2	22455.9	6391.8	29936.2	24895.8	21131.6	25980.3	6175.2	6524.9	20153.7	474.6	36.8	23212.6
GRNSFEVL	18384	0	33014	37042.5	40378.6	43374.5	39767.7	30505.8	7778	23888.8	2545.1	21394.1	26816.3	30137
CACPGRDRRTEEE	60808	0	40936.8	42350.6	43478.8	46739.7	41607.1	26590.3	22786.6	44643.9	30655.3	43090.1	37879	33318.7
VMNRRPILTIITLE	7196	1	33088.1	2676.3	19727.4	17873	32518.1	5229.9	11264.1	18949.4	624	7998.8	34584.8	16884
NRRPILTIITLED	7309	1	34522.4	20520.3	25894.5	36156.7	35439.4	5012.3	16866.1	37846.3	347	8026.3	36182.5	33703.8
FMGGMNRRPILTII	4884	1	30541.5	571	22386.5	16161.2	32058	22502.4	321	12751.5	3492.3	19474.4	33658.6	21138
GGMNRRPILTIIT	24277	0	35036.4	16860.8	26452.9	34338	37472.2	30888.7	12239.3	31988.4	5359	37807	36621.3	23094.8
RRPILTIITLE	3677	1	33942	19851.4	21497.3	32320.2	35370.8	1708.7	27153.2	34840.6	74.7	15708.1	34622.6	37689.4
DRNTFRHI	36225	0	35666.8	40361.1	41703.6	44166.3	39958.3	41780.8	21531.5	33403.5	7973.8	29104.2	38533	34613.7
IVVVPYEPPEVGSD	57981	0	38126.6	25399.4	32557.2	38261.7	33666.2	31655.1	39704.1	37398.5	42707.2	41488	34425.4	33958.2
HLIRVEGNLRVEC	24770	0	33696.5	8083.2	19368.1	42926.8	31448.2	36338.3	28078.2	35228.4	8389.3	30372.7	22693.8	33078.8
IRVEGNLRVEC	40519	0	40122.5	35756	38634	45291.5	38720.7	37403.8	34157.5	41226.2	10746.1	38125.8	22882.4	37667.8
RVEGNLRVEC	25132	0	39050.9	28240.3	29212.4	42692.9	36919.7	23974	27386.6	28673.5	31490.1	39395.1	7939.9	25276.6
CLDDRNTFRHSVVV	12374	0	14485.3	2038.1	17014.8	35775	33093.4	35200.9	9767.7	20325.6	2482.9	29705.2	33313.3	31750.1
DDRNTFRHSVVVP	36607	0	31663.6	31461.8	24058.7	38500.9	30957.7	37671.8	20569.7	32617.1	19187.7	29745.7	36376.9	35558.5
TFRHSVVVPYE	12239	1	28661.1	30674.9	25002.4	36859	24812.4	36707.8	29631.3	15365	591	24522.6	36100.4	31186.6
LAMAIYKQSQHMTE	21161	0	34447.8	28812.5	23003.1	23630.2	28123.5	28525.9	9288.4	11307.1	32235.4	35140.4	37014.1	9647.6
IYKQSQHMTEVV	14650	0	16790.4	16234.2	31389.4	3968.1	38683.4	39703.2	19178.3	18206.9	31885.7	21945.5	30768.6	27982.1
APAPSWPLSSSVPF	6164	1	25581.2	27395.8	28635.4	2472.3	29300.4	293.3	12344.9	10254.7	31875	19671.6	33424.9	29309.3
APSWPLSSSVPF	5002	2	25486.1	26576.2	27561.7	2213.9	31156.6	204.8	12564.1	11234	29990.3	19425.8	33425.6	27745.1
SWPLSSSVPF	1747	3	25575.4	27593.9	30733.7	156.4	22405	112.1	3604.6	186	15150.7	15123.2	25186.2	29388.1
WPLSSSVPF	808	3	19497.8	23673.7	30335.6	10670.6	14192.4	25.3	701.3	2404.1	16370.2	98.8	14917.7	16791.8
PLSSSVPF	17696	0	26315	32096.2	34653.7	25425.3	33321.2	3851.6	15207.6	9158.1	36378.4	21438.3	36736.4	28544.1
YQGSYGFRLGFL	7434	0	23350.9	3198.8	20729.6	3181.1	18791.1	36186.5	10491.9	2310.7	2299.9	20665.6	14714.7	17143.9
TEDPGPDEAPRMPK	35684	0	41673.3	40790	12409.7	45153.5	37032.9	26420.9	35469.7	43145.2	37896.3	38387.4	18673.8	33963.3
GPDEAPRMPK	23580	0	41336.5	39890.9	7808	47975.5	36023.6	4779.6	36645.9	43276.1	32839.8	38368.7	33700.1	29694.6
APPVAPAPAAPTP	43423	0	41375.9	41886.7	39471.9	41811.1	39446.3	9557.5	39424.1	41002.4	42739.6	39941.5	39953.1	34797.3
APAPAAPTPAA	10536	1	40909.4	40707.2	39077.1	45702.1	38847.4	423.8	37463.3	39525.3	40908.5	37100.3	40836	33355.1
ECLDDRNTF	22791	0	26853.5	39886.6	41072.6	18474.6	27406.8	28999.5	25962.9	22985.2	28558.9	15905.3	24089.2	28084.9
LGRDRRTEEENLRK	16980	0	12532.2	41376.3	9795.1	46211.2	40463	22672.2	13877.5	40760.5	7660.8	38784.8	37375	36036.8
CACPGRDRRTK	60592	0	41579.6	43244.8	19845.8	47508.1	42197.8	30641.1	38734.1	44535.4	33945.3	43417.7	40538	33575.3
MNRRPILTIITL	6206	1	32637.6	10640.2	28372.3	31969	29922.3	2041.6	8857	26712.3	407.8	7214.3	29916.4	32446.7
LQICGRERFEM	19620	0	32313.9	21510.6	36662.1	36523.6	27202.6	33483.9	18841	1906.4	17141.3	31593.5	18063.3	31722.3
RNTFRHSVVVPY	1553	2	1852.8	24123.4	9471.1	36128.6	11377.6	31535.4	21325.9	3370.6	42.3	24514.6	33024.8	26307.9
CGRERFEM	5452	1	38795.7	36288.8	42382.2	39923.8	39980.8	23610.5	217.9	32878.2	33512.5	40667.1	36258.6	29101.7
VEGNLRVEC	22409	0	32795.8	37405.8	38977.1	42342.4	34551.5	32415.2	27653.7	31786.2	36370.9	36113.7	4126.7	30249.7
KTYQGSYGFRLGF	3862	1	16729.6	17603.9	2337.9	348.8	22790.5	23794.4	22910.7	1229.8	7834	22807	23146.1	3259.7
FLRELSRVR	15356	0	28081.5	17198.4	4614.5	41645.8	20615.8	18853.4	14128.7	7204.5	16677.6	30650.3	26157.2	28735
SFHFLRELSRVR	36385	0	33123.5	22142.3	17323.1	30020.2	34802.2	35707.7	30174.6	35363.2	30003.3	27711.8	36988.4	37606.3
HFLRELSRVR	21448	0	35352.9	22874.8	3331	25120.7	32008.4	31256.2	23610	19803.8	25627.4	40341.9	34170.8	31244.7
RHTNVVFKRDAHGQ	46144	0	34765.3	36061	32323.4	38573.9	35430.6	35408.7	31382.6	30587.1	19038.5	36912.1	35487.7	28055.7
FKRDAHGQQMI	25383	0	37902.8	38926.1	38458.9	37081.8	36392.6	27869.1	19941.4	32038.2	6181.1	18215.4	36066.8	35976.8

## Sheet: Suppl. Table 5
Supplementary table 5: Epitopes, both with and without mutations that are predicted to interact with one or more HLA molecule.
Gene_Hugo	Variant	mutated_fragments	wildtype_fragments	N_binder_mut	N_binder_wild
AKT1	W22C	WLHKRGEYIKTC	WLHKRGEYI	0	1
AKT1	W22C	PRYFLLKNDGTFI	LLKNDGTFI	1	0
AKT1	W22C	CRPRYFLLKNDGTF	FLLKNDGTF	2	3
AKT1	W22C	IVKEGWLHKRGEYI	IVKEGWLHK	0	1
EGFR	T710I	APNQALLRILKEI	APNQALLRI	0	1
EGFR	T710I	ALLRILKEI	ALLRILKET	1	0
EGFR	G873R	AEEKEYHAER	AEEKEYHAE	0	1
EGFR	T710I	IEFKKIKVLGSGAF	IKVLGSGAF	1	0
EGFR	R748T	EKVKIPVAIKELT	EKVKIPVAI	0	1
ERBB4	P594L	FKDGPNCVEKCL	FKDGPNCVE	1	1
ERBB4	P594L	GLQGANSFIFKYA	ANSFIFKYA	1	0
ERBB4	P594L	LDGLQGANSFIFKY	GANSFIFKY	1	2
FBXW7	R505G	VQYDGRRVVSGAY	GRRVVSGAY	1	0
FGFR2	E275K	LPANASTVVGGDVK	LPANASTVV	0	2
KRAS	R41S	FVDEYDPTIEDSYS	FVDEYDPTI	1	2
KRAS	K117N	SEDVPMVLVGNN	SEDVPMVLV	0	1
KRAS	D47V	VGETCLLDILDTAG	LLDILDTAG	1	0
MAP2K1	D67Y	ELGAGNGGVVF	GAGNGGVVF	0	1
PIK3CA	E545K	KQEKDFLWSHRHYC	FLWSHRHYC	0	2
PIK3CA	E545K	KAISTRDPLSEITK	KAISTRDPL	0	3
PIK3CA	E545K	TRDPLSEITK	TRDPLSEIT	0	1
PIK3CA	E545K	EKDFLWSHRHYCV	LWSHRHYCV	2	2
PIK3CA	E545K	DFLWSHRHYCVT	WSHRHYCVT	1	1
PIK3CA	E545K	LWSHRHYCVTI	SHRHYCVTI	1	1
PIK3CA	E707K	ACGMYLKHLNRQVK	ACGMYLKHL	1	0
PIK3CA	E707K	CGMYLKHLNRQVK	CGMYLKHLN	1	0
PIK3CA	E707K	MEKLINLTDILKQ	INLTDILKQ	2	0
PIK3CA	E545K	STRDPLSEITK	STRDPLSEI	0	1
PTEN	P404L	CQLKVKIYSSNSGL	CQLKVKIYS	1	0
PTEN	P404L	QLKVKIYSSNSGL	QLKVKIYSS	1	1
PTEN	P404L	RREDKFMYFEFPQ	KFMYFEFPQ	1	0
PTEN	P404L	KFMYFEFPQPL	MYFEFPQPL	3	2
SMAD4	P186L	TEGHSIQTIQHPL	TEGHSIQTI	1	1
SMAD4	P186L	HSIQTIQHPL	HSIQTIQHP	2	0
SMAD4	P186L	SIQTIQHPL	SIQTIQHPP	2	0
SMAD4	P186L	NRASTETYSTPAL	TETYSTPAL	2	2
SMAD4	P186L	TETYSTPALLA	TYSTPALLA	0	1
SMAD4	P312L	GHYWPVHNELAFQL	GHYWPVHNE	2	0
SMAD4	P312L	HYWPVHNELAFQL	HYWPVHNEL	2	2
SMAD4	P312L	YWPVHNELAFQL	YWPVHNELA	2	0
SMAD4	P312L	VHNELAFQL	VHNELAFQP	1	0
SMAD4	P312L	LPISNHPAPEYWCS	HPAPEYWCS	1	0
SMAD4	P312L	NHPAPEYWCSIA	APEYWCSIA	0	1
SMAD4	P186L	ASTETYSTPALL	ETYSTPALL	1	2
SMAD4	P312L	WPVHNELAFQL	WPVHNELAF	1	2
STK11	G52R	KLIGKYLMR	KLIGKYLMG	1	0
STK11	L282R	RSDLLKGMLEYEPA	KGMLEYEPA	1	0
STK11	D284F	YAIPGDCGPPLSF	YAIPGDCGP	1	0
STK11	D284F	IPGDCGPPLSF	IPGDCGPPL	0	2
STK11	D284F	LEYEPAKRFSI	YEPAKRFSI	0	1
STK11	G52R	RKRAKLIGKYLMR	RKRAKLIGK	1	1
STK11	G52R	RAKLIGKYLMR	RAKLIGKYL	0	1
STK11	G52R	KRAKLIGKYLMR	KRAKLIGKY	1	1
STK11	G52R	AKLIGKYLMR	AKLIGKYLM	1	0
STK11	D284F	LKGMLEYEPAKRF	LEYEPAKRF	0	1
TP53	R273L	LLGRNSFEVL	LLGRNSFEV	2	1
TP53	E285K	ENLRKKGEPHHEL	KKGEPHHEL	1	0
TP53	P278L	GRNSFEVRVCACL	GRNSFEVRV	0	1
TP53	P278L	SFEVRVCACL	SFEVRVCAC	1	0
TP53	P278L	FEVRVCACL	FEVRVCACP	2	0
TP53	R273L	GRNSFEVL	GRNSFEVRV	0	1
TP53	G245V	VMNRRPILTIITLE	PILTIITLE	1	0
TP53	G245V	NRRPILTIITLED	ILTIITLED	1	0
TP53	C242F	FMGGMNRRPILTII	NRRPILTII	1	0
TP53	C242F	RRPILTIITLE	PILTIITLE	1	0
TP53	S215I	DRNTFRHI	DRNTFRHSV	0	1
TP53	Y205C	CLDDRNTFRHSVVV	NTFRHSVVV	0	1
TP53	Y205C	TFRHSVVVPYE	RHSVVVPYE	1	0
TP53	S99F	APAPSWPLSSSVPF	APAPSWPLS	1	0
TP53	S99F	APSWPLSSSVPF	APSWPLSSS	2	1
TP53	S99F	SWPLSSSVPF	SWPLSSSVP	3	0
TP53	S99F	WPLSSSVPF	WPLSSSVPS	3	1
TP53	S99F	YQGSYGFRLGFL	SYGFRLGFL	0	1
TP53	E68K	APAPAAPTPAA	APAAPTPAA	1	1
TP53	Y205C	ECLDDRNTF	EYLDDRNTF	0	1
TP53	P278L	LGRDRRTEEENLRK	RTEEENLRK	0	1
TP53	C242F	MNRRPILTIITL	RPILTIITL	1	2
TP53	R333C	LQICGRERFEM	LQIRGRERF	0	1
TP53	Y205C	RNTFRHSVVVPY	FRHSVVVPY	2	2
TP53	R333C	CGRERFEM	RGRERFEMF	1	1
TP53	S99F	KTYQGSYGFRLGF	GSYGFRLGF	1	1
NOTCH1	L1600R	FLRELSRVR	FLRELSRVL	0	4

## Sheet: Suppl. Table 6
Supplementary table 6: Epitopes, both with and without mutations which not bind to any of the 12 HLA supertypes.
Gene_Hugo	Variant	mutated_fragments	wildtype_fragments
AKT1	W22C	GEYIKTC	GEYIKTWRP
AKT1	W22C	KTC	KTWRPRYFL
AKT1	W22C	TC	TWRPRYFLL
AKT1	W22C	KTCRPRYFLLKNDGT	YFLLKNDGT
AKT1	W22C	KTCRPRYFLLKNDGTFIG	LKNDGTFIG
AKT1	W22C	YIKTCRPRYFLLKNDG	RYFLLKNDG
AKT1	W22C	YIKTC	YIKTWRPRY
AKT1	W22C	IKTC	IKTWRPRYF
AKT1	E17L	WLHKRGLYIKTWRPRYF	IKTWRPRYF
AKT1	W22C	LHKRGEYIKTCRPRYFLLK	WRPRYFLLK
BRAF	K601E	TVE	TVKSRWSGS
BRAF	K601E	KIGDFGLATVESRWSGSHQ	KSRWSGSHQ
BRAF	K601E	FGLATVESRWSGSHQFE	RWSGSHQFE
BRAF	K601E	LATVESRWSGSHQFEQ	WSGSHQFEQ
BRAF	K601E	TVESRWSGSHQFEQL	SGSHQFEQL
BRAF	K601E	GDFGLATVESRWSGSHQF	SRWSGSHQF
EGFR	T710I	PSGEAPNQALLRILKEI	PSGEAPNQA
EGFR	T710I	LKEI	LKETEFKKI
EGFR	T710I	NQALLRILKEIEFKKIKVL	TEFKKIKVL
EGFR	T710I	KEIEFKKIKVLGSGA	KIKVLGSGA
EGFR	R748T	VAIKELT	VAIKELREA
EGFR	R748T	AIKELT	AIKELREAT
EGFR	R748T	IKELT	IKELREATS
EGFR	R748T	KELT	KELREATSP
EGFR	R748T	LT	LREATSPKA
EGFR	G873R	YHAER	YHAEGGKVP
EGFR	G873R	HAER	HAEGGKVPI
EGFR	G873R	EEKEYHAERGKVPIKWMA	GKVPIKWMA
EGFR	G873R	KEYHAERGKVPIKWMAL	KVPIKWMAL
EGFR	T710I	RILKEI	RILKETEFK
EGFR	R748T	IPVAIKELTEATSPKANK	EATSPKANK
ERBB4	P594L	NCVEKCLDGLQGANSFI	GLQGANSFI
ERBB4	P594L	KCSHFKDGPNCVEKCL	KCSHFKDGP
ERBB4	P594L	CVEKCL	CVEKCPDGL
ERBB4	P594L	KCL	KCPDGLQGA
ERBB4	P594L	KCLDGLQGANSFIFK	QGANSFIFK
ERBB4	P594L	VEKCLDGLQGANSFIF	LQGANSFIF
FBXW7	R505G	AVGCVQYDGRRVVSG	YDGRRVVSG
FGFR2	E275K	GLPANASTVVGGDVK	GLPANASTV
FGFR2	E275K	AGLPANASTVVGGDVK	AGLPANAST
FGFR3	A790T	FT	FAHDLLPPA
FGFR3	S787F	SSGDDF	SSGDDSVFA
FGFR3	S787F	TPSSSSSGDDFVFAHDLLP	SVFAHDLLP
FGFR3	S787F	DDFVFAHDLLPPAPP	HDLLPPAPP
FGFR3	A790T	SVFT	SVFAHDLLP
FGFR3	A790T	VFT	VFAHDLLPP
FGFR3	A790T	SSSSGDDSVFTHDLLPPAP	AHDLLPPAP
FGFR3	A790T	DSVFTHDLLPPAPPSS	LLPPAPPSS
FGFR3	S787F	SSSGDDF	SSSGDDSVF
FGFR3	S787F	DF	DSVFAHDLL
FGFR3	A790T	DSVFT	DSVFAHDLL
KRAS	D47V	VIVGETCLLDILDTA	CLLDILDTA
KRAS	K117N	VLVGNN	VLVGNKCDL
KRAS	D47V	VIV	VIDGETCLL
KRAS	K117N	KRVKDSEDVPMVLVGNN	KRVKDSEDV
KRAS	K117N	RVKDSEDVPMVLVGNN	RVKDSEDVP
KRAS	K117N	MVLVGNN	MVLVGNKCD
KRAS	K117N	LVGNN	LVGNKCDLP
KRAS	K117N	NN	NKCDLPSRT
KRAS	K117N	EDVPMVLVGNNCDLPSRTV	KCDLPSRTV
KRAS	D47V	RKQVVIV	RKQVVIDGE
KRAS	D47V	KQVVIV	KQVVIDGET
KRAS	D47V	VVIV	VVIDGETCL
KRAS	D47V	IV	IDGETCLLD
KRAS	D47V	SYRKQVVIVGETCLLDIL	GETCLLDIL
KRAS	D47V	QVVIVGETCLLDILDT	TCLLDILDT
KRAS	R41S	NHFVDEYDPTIEDSYS	NHFVDEYDP
KRAS	R41S	HFVDEYDPTIEDSYS	HFVDEYDPT
KRAS	R41S	TIEDSYS	TIEDSYRKQ
KRAS	R41S	IEDSYS	IEDSYRKQV
KRAS	R41S	YS	YRKQVVIDG
KRAS	R41S	EYDPTIEDSYSKQVVIDGE	RKQVVIDGE
KRAS	D47V	DPTIEDSYRKQVVIV	DPTIEDSYR
KRAS	K117N	VKDSEDVPMVLVGNN	VKDSEDVPM
KRAS	D47V	YDPTIEDSYRKQVVIV	YDPTIEDSY
MAP2K1	D67Y	AFLTQKQKVGELKDDY	AFLTQKQKV
MAP2K1	D67Y	FLTQKQKVGELKDDY	FLTQKQKVG
MAP2K1	D67Y	EAFLTQKQKVGELKDDY	EAFLTQKQK
PIK3CA	E545K	LKAISTRDPLSEITK	LKAISTRDP
PIK3CA	E545K	PLSEITK	PLSEITEQE
PIK3CA	E545K	ITK	ITEQEKDFL
PIK3CA	E707K	YCRACGMYLKHLNRQVK	YCRACGMYL
PIK3CA	E545K	ITKQEKDFLWSHRHY	DFLWSHRHY
PTEN	P404L	VVCQLKVKIYSSNSGL	VVCQLKVKI
PTEN	P404L	SNSGL	SNSGPTRRE
PTEN	P404L	SNSGLTRREDKFMYFE	REDKFMYFE
PTEN	P404L	SSNSGL	SSNSGPTRR
PTEN	P404L	YSSNSGL	YSSNSGPTR
PTEN	P404L	YSSNSGLTRREDKFMYF	RREDKFMYF
SMAD4	P186L	SLSTEGHSIQTIQHPL	SLSTEGHSI
SMAD4	P312L	FQL	FQPPISNHP
SMAD4	P186L	IQHPL	IQHPPSNRA
SMAD4	P186L	HPL	HPPSNRAST
SMAD4	P186L	QTIQHPLSNRASTETYS	NRASTETYS
SMAD4	P186L	IQHPLSNRASTETYST	RASTETYST
SMAD4	P186L	HPLSNRASTETYSTP	ASTETYSTP
SMAD4	P312L	PHPGHYWPVHNELAFQL	PHPGHYWPV
SMAD4	P312L	NELAFQL	NELAFQPPI
SMAD4	P312L	VHNELAFQLPISNHPAPE	PISNHPAPE
SMAD4	P312L	FQLPISNHPAPEYWC	NHPAPEYWC
SMAD4	P312L	NELAFQLPISNHPAPEY	ISNHPAPEY
SMAD4	P186L	SIQTIQHPLSNRASTETY	SNRASTETY
STK11	G52R	YLMR	YLMGDLLGE
STK11	L282R	CGPPRSDLLKGMLEYE	LLKGMLEYE
STK11	D284F	GDCGPPLSFLLKGMLEYE	LLKGMLEYE
STK11	G52R	IGKYLMR	IGKYLMGDL
STK11	G52R	GKYLMR	GKYLMGDLL
STK11	G52R	KYLMR	KYLMGDLLG
STK11	G52R	LMR	LMGDLLGEG
STK11	G52R	MR	MGDLLGEGS
STK11	G52R	KYLMRDLLGEGSYGKV	LGEGSYGKV
STK11	L282R	PPRSDLLKGMLEYEP	LKGMLEYEP
STK11	D284F	GKGSYAIPGDCGPPLSF	GKGSYAIPG
STK11	D284F	KGSYAIPGDCGPPLSF	KGSYAIPGD
STK11	D284F	CGPPLSF	CGPPLSDLL
STK11	D284F	LSF	LSDLLKGML
STK11	D284F	CGPPLSFLLKGMLEYEP	LKGMLEYEP
STK11	D284F	PPLSFLLKGMLEYEPA	KGMLEYEPA
STK11	L282R	GDCGPPRSDLLKGMLEY	DLLKGMLEY
STK11	D284F	IPGDCGPPLSFLLKGMLEY	DLLKGMLEY
TP53	P278L	LLGRNSFEVRVCACL	LLGRNSFEV
TP53	S99F	VPFQKTYQGSYGFRL	YQGSYGFRL
TP53	E68K	RMPK	RMPEAAPPV
TP53	L252P	YMCNSSCMGGMNRRPIP	YMCNSSCMG
TP53	R333C	RERFEM	RERFEMFRE
TP53	R333C	RFEM	RFEMFRELN
TP53	R333C	FEM	FEMFRELNE
TP53	R333C	EM	EMFRELNEA
TP53	R333C	LQICGRERFEMFRELNEAL	MFRELNEAL
TP53	R333C	ICGRERFEMFRELNEALE	FRELNEALE
TP53	E285K	SFEVRVCACPGRDRRTK	SFEVRVCAC
TP53	E285K	FEVRVCACPGRDRRTK	FEVRVCACP
TP53	E285K	GRDRRTK	GRDRRTEEE
TP53	R280T	ACPGT	ACPGRDRRT
TP53	R280T	GT	GRDRRTEEE
TP53	P278L	NLLGRNSFEVRVCACL	NLLGRNSFE
TP53	P278L	ACL	ACPGRDRRT
TP53	P278L	FEVRVCACLGRDRRTEEE	GRDRRTEEE
TP53	R273L	RNSFEVL	RNSFEVRVC
TP53	R273L	NSFEVL	NSFEVRVCA
TP53	R273L	SFEVL	SFEVRVCAC
TP53	R273L	FEVL	FEVRVCACP
TP53	L252P	MCNSSCMGGMNRRPIP	MCNSSCMGG
TP53	C242F	SSFMGGMNRRPILTI	MNRRPILTI
TP53	S215I	GNLRVEYLDDRNTFRHI	GNLRVEYLD
TP53	S215I	RNTFRHI	RNTFRHSVV
TP53	S215I	NTFRHI	NTFRHSVVV
TP53	S215I	TFRHI	TFRHSVVVP
TP53	S215I	RHI	RHSVVVPYE
TP53	S215I	HI	HSVVVPYEP
TP53	S215I	YLDDRNTFRHIVVVPYEPP	SVVVPYEPP
TP53	S215I	RNTFRHIVVVPYEPPEV	VVPYEPPEV
TP53	Y205C	APPQHLIRVEGNLRVEC	APPQHLIRV
TP53	Y205C	GNLRVEC	GNLRVEYLD
TP53	Y205C	NLRVEC	NLRVEYLDD
TP53	Y205C	VEC	VEYLDDRNT
TP53	Y205C	LRVECLDDRNTFRHSV	DRNTFRHSV
TP53	Y205C	DRNTF	DRNTFRHSV
TP53	Y205C	VECLDDRNTFRHSVV	RNTFRHSVV
TP53	Y205C	RNTF	RNTFRHSVV
TP53	Y205C	NTF	NTFRHSVVV
TP53	Y205C	TF	TFRHSVVVP
TP53	Y205C	ECLDDRNTFRHSVVVPYE	RHSVVVPYE
TP53	R158L	RVLAMAIYKQSQHMT	IYKQSQHMT
TP53	S99F	APAPAPSWPLSSSVPF	APAPAPSWP
TP53	E68K	QWFTEDPGPDEAPRMPK	QWFTEDPGP
TP53	E68K	WFTEDPGPDEAPRMPK	WFTEDPGPD
TP53	E68K	FTEDPGPDEAPRMPK	FTEDPGPDE
TP53	E68K	APRMPK	APRMPEAAP
TP53	E68K	PRMPK	PRMPEAAPP
TP53	E68K	MPK	MPEAAPPVA
TP53	E68K	PDEAPRMPKAAPPVAPAP	AAPPVAPAP
TP53	E68K	EAPRMPKAAPPVAPAPA	APPVAPAPA
TP53	S99F	LSSSVPF	LSSSVPSQK
TP53	Y205C	EC	EYLDDRNTF
TP53	E285K	RTK	RTEEENLRK
TP53	S99F	PSWPLSSSVPFQKTYQGSY	SQKTYQGSY
TP53	S99F	SSVPFQKTYQGSYGFR	TYQGSYGFR
TP53	S99F	LSSSVPFQKTYQGSYGF	KTYQGSYGF
TP53	R280T	CACPGT	CACPGRDRR
TP53	P278L	CACL	CACPGRDRR
TP53	E68K	PGPDEAPRMPKAAPPVAPA	EAAPPVAPA
TP53	S215I	FRHI	FRHSVVVPY
TP53	Y205C	RVECLDDRNTFRHSVVVPY	FRHSVVVPY
TP53	S99F	PAPAPSWPLSSSVPF	PAPAPSWPL
TP53	S99F	AAPAPAPSWPLSSSVPF	AAPAPAPSW
TP53	S99F	SSVPF	SSVPSQKTY
NOTCH1	L1600R	RELSRVR	RELSRVLHT
NOTCH1	L1600R	LSRVR	LSRVLHTNV
NOTCH1	L1600R	SRVR	SRVLHTNVV
NOTCH1	L1600R	VR	VLHTNVVFK
NOTCH1	L1600R	RVR	RVLHTNVVF

## Sheet: Suppl. Table 7
Supplementary table 7: Altered epitopes that induce an immune response. These epitopes bind to one or more HLA molecule and are expected to activate CD8 positive T lymphocytes according to immunogenicity scoring.
Gene_Hugo	Variant	mutated_fragments	fragment_length	Immunogencity	N_binder
SMAD4	P312L	GHYWPVHNELAFQL	14	0.43094	2
TP53	G245V	VMNRRPILTIITLE	14	0.52734	1
TP53	G245V	NRRPILTIITLED	13	0.50712	1
TP53	C242F	RRPILTIITLE	11	0.43848	1

## Sheet: Suppl. Table 8
Supplementary table 8: Predicitive performance of immune markers in Adcs (TCGA-cohort). The expression of immune markers (GZMK, CD40L, CD20) was correlated to the amount of altered epitopes by mutation. Predictive performance was calculated for low expression of immune markers and high numbers of altered epitopes. ACTB was included for control purposes.
	GZMK	CD40L	CD20	ACTB
Positive prediction	0.81	0.78	0.84	0.47
Negative prediction	0.28	0.37	0.28	0.62
Specificty	0.73	0.75	0.75	0.67
Sensitivity	0.39	0.41	0.4	0.41

## Sheet: Suppl. Table 9
Supplemantary table 9: Clinical covariates of patients from the TCGA-AdC cohort (cohort 1, Lung adenocarcinoma).
SAMPLE_ID	PATIENT_ID	AGE	DISTANT_METASTASIS_PATHOLOGIC_SPREAD	GENDER	HISTOLOGICAL_SUBTYPE	ICD_O_3_HISTOLOGY	ICD_O_3_SITE	PRETREATMENT_HISTORY	PRIMARY_TUMOR_PATHOLOGIC_SPREAD	PRIOR_DIAGNOSIS	RESIDUAL_TUMOR	TOBACCO_SMOKING_HISTORY_INDICATOR	TUMOR_STAGE_2009	OS_STATUS	OS_MONTHS	DFS_STATUS	DFS_MONTHS	CANCER_TYPE	CANCER_TYPE_DETAILED
TCGA-05-4249-01	TCGA-05-4249-01	67	M0	MALE	Lung Adenocarcinoma- Not Otherwise Specified (NOS)	8140/3	C34.3	NO	T2	NO	R0	Current reformed smoker for > 15 years	Stage IB	LIVING	38.046	NA	NA	Non-Small Cell Lung Cancer	Lung Adenocarcinoma
TCGA-05-4382-01	TCGA-05-4382-01	68	M0	MALE	Lung Adenocarcinoma Mixed Subtype	8255/3	C34.1	NO	T2	YES	R0	Current reformed smoker for < or = 15 years	Stage IB	LIVING	19.9101	NA	NA	Non-Small Cell Lung Cancer	Lung Adenocarcinoma
TCGA-05-4384-01	TCGA-05-4384-01	66	M0	MALE	Lung Adenocarcinoma Mixed Subtype	8255/3	C34.3	NO	T2	YES	RX	Current reformed smoker for > 15 years	Stage IIIA	LIVING	13.9962	NA	NA	Non-Small Cell Lung Cancer	Lung Adenocarcinoma
TCGA-05-4389-01	TCGA-05-4389-01	70	M0	MALE	Lung Adenocarcinoma Mixed Subtype	8255/3	C34.1	NO	T1	NO	R0	Current reformed smoker for > 15 years	Stage IA	LIVING	NA	NA	NA	Non-Small Cell Lung Cancer	Lung Adenocarcinoma
TCGA-05-4390-01	TCGA-05-4390-01	58	M0	FEMALE	Lung Adenocarcinoma Mixed Subtype	8255/3	C34.1	NO	T2	NO	R0	Current reformed smoker for < or = 15 years	Stage IB	LIVING	36.9946	NA	NA	Non-Small Cell Lung Cancer	Lung Adenocarcinoma
TCGA-05-4395-01	TCGA-05-4395-01	76	M0	MALE	Lung Adenocarcinoma Mixed Subtype	8255/3	C34.1	NO	T4	NO	R0	Lifelong Non-smoker	Stage IIIB	DECEASED	0	NA	NA	Non-Small Cell Lung Cancer	Lung Adenocarcinoma
TCGA-05-4396-01	TCGA-05-4396-01	76	M0	MALE	Lung Adenocarcinoma Mixed Subtype	8255/3	C34.3	NO	T4	YES	R0	Current reformed smoker for > 15 years	Stage IIIB	DECEASED	9.95503	NA	NA	Non-Small Cell Lung Cancer	Lung Adenocarcinoma
TCGA-05-4398-01	TCGA-05-4398-01	47	M0	FEMALE	Lung Adenocarcinoma Mixed Subtype	8255/3	C34.1	NO	T4	NO	R0	Current smoker	Stage IIIB	LIVING	47.0154	NA	NA	Non-Small Cell Lung Cancer	Lung Adenocarcinoma
TCGA-05-4402-01	TCGA-05-4402-01	57	M1	FEMALE	Lung Adenocarcinoma Mixed Subtype	8255/3	C34.3	NO	T2	YES	R2	Lifelong Non-smoker	Stage IV	DECEASED	8.0166	NA	NA	Non-Small Cell Lung Cancer	Lung Adenocarcinoma
TCGA-05-4403-01	TCGA-05-4403-01	76	M0	MALE	Lung Adenocarcinoma Mixed Subtype	8255/3	C34.1	NO	T2	NO	R0	Current reformed smoker for > 15 years	Stage IB	LIVING	NA	NA	NA	Non-Small Cell Lung Cancer	Lung Adenocarcinoma
TCGA-05-4405-01	TCGA-05-4405-01	74	M0	FEMALE	Lung Adenocarcinoma Mixed Subtype	8255/3	C34.3	NO	T2	YES	R0	Current reformed smoker for < or = 15 years	Stage IB	LIVING	20.0415	NA	NA	Non-Small Cell Lung Cancer	Lung Adenocarcinoma
TCGA-05-4410-01	TCGA-05-4410-01	62	M0	MALE	Lung Adenocarcinoma Mixed Subtype	8255/3	C34.1	NO	T2	YES	RX	Current reformed smoker for < or = 15 years	Stage IB	LIVING	0	NA	NA	Non-Small Cell Lung Cancer	Lung Adenocarcinoma
TCGA-05-4415-01	TCGA-05-4415-01	57	M0	MALE	Lung Adenocarcinoma Mixed Subtype	8255/3	C34.3	NO	T4	NO	R0	Current reformed smoker for < or = 15 years	Stage IIIB	DECEASED	2.95694	NA	NA	Non-Small Cell Lung Cancer	Lung Adenocarcinoma
TCGA-05-4417-01	TCGA-05-4417-01	51	M0	FEMALE	Lung Adenocarcinoma Mixed Subtype	8255/3	C34.1	NO	T2	NO	R0	Current reformed smoker for < or = 15 years	Stage IB	LIVING	14.9161	NA	NA	Non-Small Cell Lung Cancer	Lung Adenocarcinoma
TCGA-05-4418-01	TCGA-05-4418-01	69	M0	MALE	Lung Adenocarcinoma Mixed Subtype	8255/3	C34.3	NO	T3	YES	R0	Current smoker	Stage IIIA	DECEASED	8.96939	NA	NA	Non-Small Cell Lung Cancer	Lung Adenocarcinoma
TCGA-05-4420-01	TCGA-05-4420-01	41	M0	MALE	Lung Adenocarcinoma Mixed Subtype	8255/3	C34.3	NO	T2	NO	R0	Current smoker	Stage IB	LIVING	29.9308	NA	NA	Non-Small Cell Lung Cancer	Lung Adenocarcinoma
TCGA-05-4422-01	TCGA-05-4422-01	68	M0	MALE	Lung Adenocarcinoma Mixed Subtype	8255/3	C34.3	NO	T2	NO	R0	Current reformed smoker for < or = 15 years	Stage IB	LIVING	NA	NA	NA	Non-Small Cell Lung Cancer	Lung Adenocarcinoma
TCGA-05-4424-01	TCGA-05-4424-01	70	M0	MALE	Lung Adenocarcinoma Mixed Subtype	8255/3	C34.1	NO	T3	NO	R1	Current reformed smoker for < or = 15 years	Stage IIB	LIVING	29.9965	NA	NA	Non-Small Cell Lung Cancer	Lung Adenocarcinoma
TCGA-05-4425-01	TCGA-05-4425-01	70	M1	FEMALE	Lung Adenocarcinoma Mixed Subtype	8255/3	C34.2	NO	T2	NO	R1	Current reformed smoker for > 15 years	Stage IV	LIVING	NA	NA	NA	Non-Small Cell Lung Cancer	Lung Adenocarcinoma
TCGA-05-4426-01	TCGA-05-4426-01	71	M0	MALE	Lung Adenocarcinoma Mixed Subtype	8255/3	C34.3	NO	T2	NO	R0	Current reformed smoker for > 15 years	Stage IB	LIVING	25.9882	NA	NA	Non-Small Cell Lung Cancer	Lung Adenocarcinoma
TCGA-05-4430-01	TCGA-05-4430-01	59	M0	FEMALE	Lung Adenocarcinoma Mixed Subtype	8255/3	C34.3	NO	T2	NO	R0	Current reformed smoker for < or = 15 years	Stage IB	LIVING	25.0026	NA	NA	Non-Small Cell Lung Cancer	Lung Adenocarcinoma
TCGA-05-4432-01	TCGA-05-4432-01	66	M0	MALE	Lung Adenocarcinoma Mixed Subtype	8255/3	C34.1	NO	T2	NO	R0	Current smoker	Stage IIB	LIVING	25.0026	NA	NA	Non-Small Cell Lung Cancer	Lung Adenocarcinoma
TCGA-05-4433-01	TCGA-05-4433-01	82	M0	MALE	Lung Adenocarcinoma Mixed Subtype	8255/3	C34.3	NO	T2	NO	R0	Current reformed smoker for > 15 years	Stage IB	LIVING	23.9841	NA	NA	Non-Small Cell Lung Cancer	Lung Adenocarcinoma
TCGA-05-5420-01	TCGA-05-5420-01	67	M0	MALE	Lung Adenocarcinoma- Not Otherwise Specified (NOS)	8140/3	C34.1	NO	T2	YES	R0	Current reformed smoker for < or = 15 years	Stage IIIA	LIVING	1.0185	NA	NA	Non-Small Cell Lung Cancer	Lung Adenocarcinoma
TCGA-05-5423-01	TCGA-05-5423-01	65	M0	MALE	Lung Adenocarcinoma Mixed Subtype	8255/3	C34.1	NO	T2	NO	R0	Current reformed smoker for > 15 years	Stage IIB	LIVING	4.96109	NA	NA	Non-Small Cell Lung Cancer	Lung Adenocarcinoma
TCGA-05-5428-01	TCGA-05-5428-01	57	M0	MALE	Lung Adenocarcinoma Mixed Subtype	8255/3	C34.1	NO	T1b	NO	R0	Current reformed smoker for > 15 years	Stage IIA	LIVING	0	NA	NA	Non-Small Cell Lung Cancer	Lung Adenocarcinoma
TCGA-05-5429-01	TCGA-05-5429-01	60	M0	MALE	Lung Adenocarcinoma- Not Otherwise Specified (NOS)	8140/3	C34.9	NO	T3	NO	R0	Lifelong Non-smoker	Stage IIIA	LIVING	0.985647	NA	NA	Non-Small Cell Lung Cancer	Lung Adenocarcinoma
TCGA-05-5715-01	TCGA-05-5715-01	69	M0	FEMALE	Lung Adenocarcinoma Mixed Subtype	8255/3	C34.1	NO	T2a	NO	R0	Lifelong Non-smoker	Stage IB	LIVING	2.037	NA	NA	Non-Small Cell Lung Cancer	Lung Adenocarcinoma
TCGA-35-3615-01	TCGA-35-3615-01	57	M0	MALE	Lung Adenocarcinoma- Not Otherwise Specified (NOS)	8140/3	C34.1	NO	T2	NO	R0	Lifelong Non-smoker	Stage IB	LIVING	0.459969	NA	NA	Non-Small Cell Lung Cancer	Lung Adenocarcinoma
TCGA-38-4626-01	TCGA-38-4626-01	57	M0	FEMALE	Lung Adenocarcinoma- Not Otherwise Specified (NOS)	8140/3	C34.1	NO	T2b	NO	R0	Current smoker	Stage IIA	LIVING	85.2585	NA	NA	Non-Small Cell Lung Cancer	Lung Adenocarcinoma
TCGA-38-4627-01	TCGA-38-4627-01	64	M0	FEMALE	Lung Adenocarcinoma- Not Otherwise Specified (NOS)	8140/3	C34.1	NO	T1b	NO	R0	Current reformed smoker for < or = 15 years	Stage IIA	DECEASED	37.6846	NA	NA	Non-Small Cell Lung Cancer	Lung Adenocarcinoma
TCGA-38-4628-01	TCGA-38-4628-01	65	M0	FEMALE	Lung Adenocarcinoma- Not Otherwise Specified (NOS)	8140/3	C34.1	NO	T2	NO	R0	Lifelong Non-smoker	Stage IIB	DECEASED	48.9867	NA	NA	Non-Small Cell Lung Cancer	Lung Adenocarcinoma
TCGA-38-4631-01	TCGA-38-4631-01	72	M0	FEMALE	Lung Adenocarcinoma- Not Otherwise Specified (NOS)	8140/3	C34.1	NO	T2	YES	R0	Current reformed smoker for < or = 15 years	Stage IB	DECEASED	11.6306	NA	NA	Non-Small Cell Lung Cancer	Lung Adenocarcinoma
TCGA-38-4632-01	TCGA-38-4632-01	42	M1	MALE	Lung Adenocarcinoma- Not Otherwise Specified (NOS)	8140/3	C34.1	NO	T2	NO	R0	Current reformed smoker for < or = 15 years	Stage IV	DECEASED	44.5841	NA	NA	Non-Small Cell Lung Cancer	Lung Adenocarcinoma
TCGA-38-6178-01	TCGA-38-6178-01	70	[Not Available]	FEMALE	Lung Adenocarcinoma- Not Otherwise Specified (NOS)	8140/3	C34.1	NO	T2b	YES	R1	Lifelong Non-smoker	Stage IIIA	LIVING	5.19107	NA	NA	Non-Small Cell Lung Cancer	Lung Adenocarcinoma
TCGA-44-2655-01	TCGA-44-2655-01	65	M0	FEMALE	Lung Adenocarcinoma- Not Otherwise Specified (NOS)	8140/3	C34.1	NO	T1	YES	R0	Current reformed smoker for > 15 years	Stage IA	LIVING	18.8587	NA	NA	Non-Small Cell Lung Cancer	Lung Adenocarcinoma
TCGA-44-2656-01	TCGA-44-2656-01	59	M0	MALE	Lung Adenocarcinoma- Not Otherwise Specified (NOS)	8140/3	C34.1	NO	T2	NO	[Not Available]	Current reformed smoker for < or = 15 years	Stage IB	LIVING	19.0887	NA	NA	Non-Small Cell Lung Cancer	Lung Adenocarcinoma
TCGA-44-2657-01	TCGA-44-2657-01	74	M0	FEMALE	Lung Adenocarcinoma- Not Otherwise Specified (NOS)	8140/3	C34.1	NO	T2	NO	R0	Current reformed smoker for < or = 15 years	Stage IB	LIVING	13.142	NA	NA	Non-Small Cell Lung Cancer	Lung Adenocarcinoma
TCGA-44-2659-01	TCGA-44-2659-01	65	M0	FEMALE	Lung Adenocarcinoma- Not Otherwise Specified (NOS)	8140/3	C34.3	NO	T1	NO	R0	Current reformed smoker for < or = 15 years	Stage IIB	LIVING	17.3802	NA	NA	Non-Small Cell Lung Cancer	Lung Adenocarcinoma
TCGA-44-2661-01	TCGA-44-2661-01	69	M0	FEMALE	Lung Adenocarcinoma- Not Otherwise Specified (NOS)	8140/3	C34.1	NO	T1	YES	R0	Lifelong Non-smoker	Stage IA	LIVING	3.38405	NA	NA	Non-Small Cell Lung Cancer	Lung Adenocarcinoma
TCGA-44-2662-01	TCGA-44-2662-01	65	M0	MALE	Lung Adenocarcinoma- Not Otherwise Specified (NOS)	8140/3	C34.1	NO	T2	YES	R0	Current reformed smoker for > 15 years	Stage IB	LIVING	15.7704	NA	NA	Non-Small Cell Lung Cancer	Lung Adenocarcinoma
TCGA-44-2665-01	TCGA-44-2665-01	55	M0	FEMALE	Lung Adenocarcinoma- Not Otherwise Specified (NOS)	8140/3	C34.1	NO	T2	NO	R0	Lifelong Non-smoker	Stage IIB	LIVING	13.142	NA	NA	Non-Small Cell Lung Cancer	Lung Adenocarcinoma
TCGA-44-2666-01	TCGA-44-2666-01	43	M0	MALE	Lung Adenocarcinoma- Not Otherwise Specified (NOS)	8140/3	C34.1	NO	T2	NO	R0	Current smoker	Stage IB	DECEASED	3.18693	NA	NA	Non-Small Cell Lung Cancer	Lung Adenocarcinoma
TCGA-44-3396-01	TCGA-44-3396-01	74	M0	FEMALE	Lung Adenocarcinoma- Not Otherwise Specified (NOS)	8140/3	C34.1	NO	T2	NO	R0	Current smoker	Stage IIIA	LIVING	10.2179	NA	NA	Non-Small Cell Lung Cancer	Lung Adenocarcinoma
TCGA-44-3919-01	TCGA-44-3919-01	71	M0	FEMALE	Lung Adenocarcinoma- Not Otherwise Specified (NOS)	8140/3	C34.1	NO	T1	NO	R0	Lifelong Non-smoker	Stage IA	LIVING	6.20958	NA	NA	Non-Small Cell Lung Cancer	Lung Adenocarcinoma
TCGA-44-4112-01	TCGA-44-4112-01	60	M0	FEMALE	Lung Adenocarcinoma- Not Otherwise Specified (NOS)	8140/3	C34.1	NO	T2a	NO	R0	Current reformed smoker for > 15 years	Stage IB	LIVING	4.59969	NA	NA	Non-Small Cell Lung Cancer	Lung Adenocarcinoma
TCGA-44-5645-01	TCGA-44-5645-01	61	[Not Available]	FEMALE	Lung Adenocarcinoma- Not Otherwise Specified (NOS)	8140/3	C34.1	NO	[Not Available]	NO	[Not Available]	Current reformed smoker for > 15 years	Stage IA	LIVING	6.83382	NA	NA	Non-Small Cell Lung Cancer	Lung Adenocarcinoma
TCGA-44-6145-01	TCGA-44-6145-01	62	M0	FEMALE	Lung Adenocarcinoma- Not Otherwise Specified (NOS)	8140/3	C34.1	NO	T1	NO	[Not Available]	Current reformed smoker for < or = 15 years	Stage IA	LIVING	3.3512	NA	NA	Non-Small Cell Lung Cancer	Lung Adenocarcinoma
TCGA-44-6146-01	TCGA-44-6146-01	64	M0	MALE	Lung Mucinous Adenocarcinoma	8480/3	C34.3	NO	T3	YES	[Not Available]	Current reformed smoker for > 15 years	Stage IIB	LIVING	9.92218	NA	NA	Non-Small Cell Lung Cancer	Lung Adenocarcinoma
TCGA-44-6147-01	TCGA-44-6147-01	67	M0	FEMALE	Lung Adenocarcinoma- Not Otherwise Specified (NOS)	8140/3	C34.1	NO	T1b	YES	[Not Available]	Current reformed smoker for > 15 years	Stage IA	LIVING	7.75376	NA	NA	Non-Small Cell Lung Cancer	Lung Adenocarcinoma
TCGA-44-6774-01	TCGA-44-6774-01	56	M0	FEMALE	Lung Adenocarcinoma- Not Otherwise Specified (NOS)	8140/3	C34.3	NO	T1	NO	[Not Available]	Current smoker	Stage IIIA	LIVING	5.42106	NA	NA	Non-Small Cell Lung Cancer	Lung Adenocarcinoma
TCGA-44-6775-01	TCGA-44-6775-01	72	MX	FEMALE	Lung Adenocarcinoma- Not Otherwise Specified (NOS)	8140/3	C34.1	NO	T2a	NO	RX	Current reformed smoker for < or = 15 years	Stage IB	LIVING	2.6941	NA	NA	Non-Small Cell Lung Cancer	Lung Adenocarcinoma
TCGA-44-6776-01	TCGA-44-6776-01	60	MX	FEMALE	Lung Adenocarcinoma- Not Otherwise Specified (NOS)	8140/3	C34.1	NO	T1	YES	[Not Available]	Current reformed smoker for < or = 15 years	Stage IA	LIVING	63.6728	NA	NA	Non-Small Cell Lung Cancer	Lung Adenocarcinoma
TCGA-44-6777-01	TCGA-44-6777-01	85	MX	FEMALE	Lung Adenocarcinoma- Not Otherwise Specified (NOS)	8140/3	C34.1	NO	T2	NO	[Not Available]	Current reformed smoker for < or = 15 years	Stage IB	DECEASED	32.4278	NA	NA	Non-Small Cell Lung Cancer	Lung Adenocarcinoma
TCGA-44-6779-01	TCGA-44-6779-01	50	MX	FEMALE	Lung Adenocarcinoma- Not Otherwise Specified (NOS)	8140/3	C34.9	NO	T2	NO	[Not Available]	Current reformed smoker for < or = 15 years	Stage IIB	DECEASED	16.3946	NA	NA	Non-Small Cell Lung Cancer	Lung Adenocarcinoma
TCGA-44-7659-01	TCGA-44-7659-01	70	MX	MALE	Lung Adenocarcinoma- Not Otherwise Specified (NOS)	8140/3	C34.1	NO	T1b	NO	[Not Available]	Current smoker	Stage IA	LIVING	9.79076	NA	NA	Non-Small Cell Lung Cancer	Lung Adenocarcinoma
TCGA-44-7662-01	TCGA-44-7662-01	61	MX	MALE	Lung Adenocarcinoma- Not Otherwise Specified (NOS)	8140/3	C34.1	NO	T2a	NO	[Not Available]	Current smoker	Stage IB	LIVING	1.64274	NA	NA	Non-Small Cell Lung Cancer	Lung Adenocarcinoma
TCGA-44-7670-01	TCGA-44-7670-01	47	M0	FEMALE	Lung Adenocarcinoma- Not Otherwise Specified (NOS)	8140/3	C34.1	NO	T1b	YES	[Not Available]	Current smoker	Stage IIA	LIVING	17.446	NA	NA	Non-Small Cell Lung Cancer	Lung Adenocarcinoma
TCGA-44-7671-01	TCGA-44-7671-01	64	M0	MALE	Lung Adenocarcinoma Mixed Subtype	8255/3	C34.2	NO	T2a	YES	[Not Available]	Current reformed smoker for > 15 years	Stage IB	LIVING	17.5774	NA	NA	Non-Small Cell Lung Cancer	Lung Adenocarcinoma
TCGA-44-7672-01	TCGA-44-7672-01	52	M0	FEMALE	Lung Adenocarcinoma- Not Otherwise Specified (NOS)	8140/3	C34.1	NO	T1b	NO	[Not Available]	Current smoker	Stage IA	LIVING	13.7333	NA	NA	Non-Small Cell Lung Cancer	Lung Adenocarcinoma
TCGA-49-4486-01	TCGA-49-4486-01	72	M0	MALE	Lung Adenocarcinoma- Not Otherwise Specified (NOS)	8140/3	C34.3	NO	T1	NO	R0	Current reformed smoker for > 15 years	Stage IA	DECEASED	76.1577	NA	NA	Non-Small Cell Lung Cancer	Lung Adenocarcinoma
TCGA-49-4487-01	TCGA-49-4487-01	72	M0	FEMALE	Lung Adenocarcinoma- Not Otherwise Specified (NOS)	8140/3	C34.1	NO	T1	NO	R0	Current reformed smoker for < or = 15 years	Stage IA	DECEASED	28.0909	NA	NA	Non-Small Cell Lung Cancer	Lung Adenocarcinoma
TCGA-49-4488-01	TCGA-49-4488-01	74	MX	FEMALE	Lung Adenocarcinoma- Not Otherwise Specified (NOS)	8140/3	C34.3	NO	T1	NO	R0	Current reformed smoker for > 15 years	Stage IA	DECEASED	28.5509	NA	NA	Non-Small Cell Lung Cancer	Lung Adenocarcinoma
TCGA-49-4490-01	TCGA-49-4490-01	45	M0	FEMALE	Lung Adenocarcinoma- Not Otherwise Specified (NOS)	8140/3	C34.1	NO	T3	NO	[Not Available]	Current reformed smoker for > 15 years	Stage IIIA	DECEASED	12.6491	NA	NA	Non-Small Cell Lung Cancer	Lung Adenocarcinoma
TCGA-49-4494-01	TCGA-49-4494-01	77	M0	MALE	Lung Adenocarcinoma- Not Otherwise Specified (NOS)	8140/3	C34.1	NO	T3	NO	R0	Current reformed smoker for > 15 years	Stage IIIA	DECEASED	35.5161	NA	NA	Non-Small Cell Lung Cancer	Lung Adenocarcinoma
TCGA-49-4501-01	TCGA-49-4501-01	67	M0	FEMALE	Lung Adenocarcinoma- Not Otherwise Specified (NOS)	8140/3	C34.1	NO	T2	YES	R0	Lifelong Non-smoker	Stage IB	DECEASED	46.6868	NA	NA	Non-Small Cell Lung Cancer	Lung Adenocarcinoma
TCGA-49-4505-01	TCGA-49-4505-01	61	M0	FEMALE	Lung Adenocarcinoma- Not Otherwise Specified (NOS)	8140/3	C34.3	NO	T2	NO	R0	Current reformed smoker for < or = 15 years	Stage IIB	DECEASED	14.0619	NA	NA	Non-Small Cell Lung Cancer	Lung Adenocarcinoma
TCGA-49-4506-01	TCGA-49-4506-01	68	M0	FEMALE	Lung Adenocarcinoma- Not Otherwise Specified (NOS)	8140/3	C34.1	NO	T2	NO	R1	Current smoker	Stage IIB	DECEASED	32.822	NA	NA	Non-Small Cell Lung Cancer	Lung Adenocarcinoma
TCGA-49-4507-01	TCGA-49-4507-01	73	M0	FEMALE	Lung Adenocarcinoma- Not Otherwise Specified (NOS)	8140/3	C34.0	NO	T3	NO	R0	Current reformed smoker for < or = 15 years	Stage IIIA	DECEASED	8.80511	NA	NA	Non-Small Cell Lung Cancer	Lung Adenocarcinoma
TCGA-49-4510-01	TCGA-49-4510-01	51	M0	FEMALE	Lung Adenocarcinoma- Not Otherwise Specified (NOS)	8140/3	C34.1	NO	T2	NO	R0	Current smoker	Stage IIB	DECEASED	29.438	NA	NA	Non-Small Cell Lung Cancer	Lung Adenocarcinoma
TCGA-49-4512-01	TCGA-49-4512-01	69	MX	FEMALE	Lung Adenocarcinoma- Not Otherwise Specified (NOS)	8140/3	C34.2	NO	T2	NO	[Not Available]	Lifelong Non-smoker	Stage IIIA	DECEASED	29.7337	NA	NA	Non-Small Cell Lung Cancer	Lung Adenocarcinoma
TCGA-49-4514-01	TCGA-49-4514-01	79	M0	FEMALE	Lung Papillary Adenocarcinoma	8260/3	C34.1	NO	T1	NO	RX	Current reformed smoker for > 15 years	Stage IA	LIVING	43.1713	NA	NA	Non-Small Cell Lung Cancer	Lung Adenocarcinoma
TCGA-49-6742-01	TCGA-49-6742-01	70	MX	MALE	Mucinous (Colloid) Adenocarcinoma	8480/3	C34.1	NO	T2	YES	[Not Available]	Current reformed smoker for > 15 years	Stage IIB	LIVING	15.0147	NA	NA	Non-Small Cell Lung Cancer	Lung Adenocarcinoma
TCGA-49-6744-01	TCGA-49-6744-01	64	MX	FEMALE	Lung Adenocarcinoma Mixed Subtype	8255/3	C34.1	NO	T2a	NO	RX	Current reformed smoker for < or = 15 years	Stage IIA	LIVING	12.9777	NA	NA	Non-Small Cell Lung Cancer	Lung Adenocarcinoma
TCGA-49-6745-01	TCGA-49-6745-01	82	MX	MALE	Lung Papillary Adenocarcinoma	8260/3	C34.1	NO	T2a	YES	[Not Available]	Current reformed smoker for < or = 15 years	Stage IIIA	LIVING	4.92823	NA	NA	Non-Small Cell Lung Cancer	Lung Adenocarcinoma
TCGA-49-6761-01	TCGA-49-6761-01	68	MX	FEMALE	Lung Adenocarcinoma- Not Otherwise Specified (NOS)	8140/3	C34.1	NO	T1	NO	[Not Available]	Current reformed smoker for < or = 15 years	Stage IIIA	LIVING	0.0328549	NA	NA	Non-Small Cell Lung Cancer	Lung Adenocarcinoma
TCGA-49-6767-01	TCGA-49-6767-01	46	MX	FEMALE	Lung Adenocarcinoma- Not Otherwise Specified (NOS)	8140/3	C34.2	NO	T3	NO	R0	Current smoker	Stage IIB	LIVING	0	NA	NA	Non-Small Cell Lung Cancer	Lung Adenocarcinoma
TCGA-50-5044-01	TCGA-50-5044-01	72	M0	FEMALE	Lung Adenocarcinoma- Not Otherwise Specified (NOS)	8140/3	C34.3	NO	T4	NO	[Not Available]	[Not Available]	Stage IIIB	DECEASED	20.4686	NA	NA	Non-Small Cell Lung Cancer	Lung Adenocarcinoma
TCGA-50-5049-01	TCGA-50-5049-01	70	M0	MALE	Lung Adenocarcinoma- Not Otherwise Specified (NOS)	8140/3	C34.1	NO	T2	NO	[Not Available]	[Not Available]	Stage IA	LIVING	48.7895	NA	NA	Non-Small Cell Lung Cancer	Lung Adenocarcinoma
TCGA-50-5051-01	TCGA-50-5051-01	42	M0	FEMALE	Lung Adenocarcinoma- Not Otherwise Specified (NOS)	8140/3	C34.1	NO	T2	NO	[Not Available]	Current reformed smoker for < or = 15 years	Stage IIIA	LIVING	14.949	NA	NA	Non-Small Cell Lung Cancer	Lung Adenocarcinoma
TCGA-50-5055-01	TCGA-50-5055-01	79	M0	FEMALE	Lung Adenocarcinoma Mixed Subtype	8255/3	C34.3	NO	T1	NO	R0	[Not Available]	Stage IIA	LIVING	25.7911	NA	NA	Non-Small Cell Lung Cancer	Lung Adenocarcinoma
TCGA-50-5068-01	TCGA-50-5068-01	59	MX	FEMALE	Lung Adenocarcinoma- Not Otherwise Specified (NOS)	8140/3	C34.3	NO	T2	NO	[Not Available]	[Not Available]	Stage IIB	DECEASED	49.2495	NA	NA	Non-Small Cell Lung Cancer	Lung Adenocarcinoma
TCGA-50-5072-01	TCGA-50-5072-01	74	M0	MALE	Lung Adenocarcinoma- Not Otherwise Specified (NOS)	8140/3	C34.1	YES	T2	NO	[Not Available]	Current reformed smoker for > 15 years	Stage IIIA	LIVING	8.04945	NA	NA	Non-Small Cell Lung Cancer	Lung Adenocarcinoma
TCGA-50-5931-01	TCGA-50-5931-01	75	M0	FEMALE	Lung Adenocarcinoma- Not Otherwise Specified (NOS)	8140/3	C34.1	NO	T2	NO	[Not Available]	[Not Available]	Stage IB	DECEASED	8.77226	NA	NA	Non-Small Cell Lung Cancer	Lung Adenocarcinoma
TCGA-50-5932-01	TCGA-50-5932-01	75	M0	MALE	Lung Adenocarcinoma- Not Otherwise Specified (NOS)	8140/3	C34.1	NO	T2	YES	[Not Available]	[Not Available]	Stage IIB	DECEASED	35.8447	NA	NA	Non-Small Cell Lung Cancer	Lung Adenocarcinoma
TCGA-50-5933-01	TCGA-50-5933-01	72	M0	MALE	Lung Adenocarcinoma- Not Otherwise Specified (NOS)	8140/3	C34.3	NO	T4	NO	[Not Available]	[Not Available]	Stage IIIB	DECEASED	77.8333	NA	NA	Non-Small Cell Lung Cancer	Lung Adenocarcinoma
TCGA-50-5935-01	TCGA-50-5935-01	86	M0	FEMALE	Lung Adenocarcinoma- Not Otherwise Specified (NOS)	8140/3	C34.1	NO	T1	YES	[Not Available]	[Not Available]	Stage IA	DECEASED	21.4542	NA	NA	Non-Small Cell Lung Cancer	Lung Adenocarcinoma
TCGA-50-5936-01	TCGA-50-5936-01	58	M0	MALE	Mucinous (Colloid) Adenocarcinoma	8480/3	C34.3	NO	T2	NO	[Not Available]	[Not Available]	Stage IIIA	DECEASED	8.44371	NA	NA	Non-Small Cell Lung Cancer	Lung Adenocarcinoma
TCGA-50-5939-01	TCGA-50-5939-01	85	M0	MALE	Lung Adenocarcinoma Mixed Subtype	8255/3	C34.1	NO	T2	YES	[Not Available]	Current reformed smoker for > 15 years	Stage IB	DECEASED	15.1133	NA	NA	Non-Small Cell Lung Cancer	Lung Adenocarcinoma
TCGA-50-5941-01	TCGA-50-5941-01	55	M0	FEMALE	Lung Adenocarcinoma- Not Otherwise Specified (NOS)	8140/3	C34.1	NO	T2a	NO	[Not Available]	Current smoker	Stage IIIA	LIVING	9.36365	NA	NA	Non-Small Cell Lung Cancer	Lung Adenocarcinoma
TCGA-50-5942-01	TCGA-50-5942-01	67	M0	FEMALE	Lung Adenocarcinoma- Not Otherwise Specified (NOS)	8140/3	C34.1	NO	T1	NO	[Not Available]	Current reformed smoker for < or = 15 years	[Not Available]	LIVING	4.43541	NA	NA	Non-Small Cell Lung Cancer	Lung Adenocarcinoma
TCGA-50-5944-01	TCGA-50-5944-01	69	MX	FEMALE	Lung Acinar Adenocarcinoma	8550/3	C34.1	NO	T1	NO	[Not Available]	[Not Available]	Stage IA	LIVING	12.2549	NA	NA	Non-Small Cell Lung Cancer	Lung Adenocarcinoma
TCGA-50-6593-01	TCGA-50-6593-01	49	M0	FEMALE	Lung Adenocarcinoma Mixed Subtype	8255/3	C34.1	NO	T1	NO	[Not Available]	Current reformed smoker for < or = 15 years	Stage IIIA	DECEASED	11.0392	NA	NA	Non-Small Cell Lung Cancer	Lung Adenocarcinoma
TCGA-50-6595-01	TCGA-50-6595-01	74	M0	FEMALE	Lung Adenocarcinoma- Not Otherwise Specified (NOS)	8140/3	C34.1	NO	T2	NO	[Not Available]	Current reformed smoker for > 15 years	Stage IIIA	DECEASED	6.20958	NA	NA	Non-Small Cell Lung Cancer	Lung Adenocarcinoma
TCGA-50-6597-01	TCGA-50-6597-01	79	M0	FEMALE	Lung Adenocarcinoma- Not Otherwise Specified (NOS)	8140/3	C34.3	NO	T2	NO	[Not Available]	Lifelong Non-smoker	Stage IB	LIVING	33.3477	NA	NA	Non-Small Cell Lung Cancer	Lung Adenocarcinoma
TCGA-50-6673-01	TCGA-50-6673-01	84	M0	FEMALE	Lung Adenocarcinoma- Not Otherwise Specified (NOS)	8140/3	C34.1	NO	T1	NO	[Not Available]	Lifelong Non-smoker	Stage IA	DECEASED	0.722808	NA	NA	Non-Small Cell Lung Cancer	Lung Adenocarcinoma
TCGA-50-7109-01	TCGA-50-7109-01	60	MX	MALE	Lung Adenocarcinoma- Not Otherwise Specified (NOS)	8140/3	C34.3	NO	T1	NO	[Not Available]	Current smoker	Stage I	LIVING	8.378	NA	NA	Non-Small Cell Lung Cancer	Lung Adenocarcinoma
TCGA-53-7626-01	TCGA-53-7626-01	76	M0	FEMALE	Lung Adenocarcinoma- Not Otherwise Specified (NOS)	8140/3	C34.1	NO	T1	NO	R0	Current reformed smoker for < or = 15 years	Stage IIA	LIVING	31.8693	NA	NA	Non-Small Cell Lung Cancer	Lung Adenocarcinoma
TCGA-53-7813-01	TCGA-53-7813-01	51	M0	FEMALE	Lung Bronchioloalveolar Carcinoma Nonmucinous	8252/3	C34.1	NO	T4	NO	[Not Available]	Current reformed smoker for < or = 15 years	Stage IIIB	LIVING	13.7333	NA	NA	Non-Small Cell Lung Cancer	Lung Adenocarcinoma
TCGA-55-1592-01	TCGA-55-1592-01	65	M0	MALE	Lung Adenocarcinoma- Not Otherwise Specified (NOS)	8140/3	C34.1	NO	T2	YES	R0	Current reformed smoker for < or = 15 years	Stage IA	DECEASED	23.0313	NA	NA	Non-Small Cell Lung Cancer	Lung Adenocarcinoma
TCGA-55-1594-01	TCGA-55-1594-01	68	M0	MALE	Lung Adenocarcinoma- Not Otherwise Specified (NOS)	8140/3	C34.3	NO	T2	NO	R0	Current smoker	Stage IIIA	LIVING	38.7031	NA	NA	Non-Small Cell Lung Cancer	Lung Adenocarcinoma
TCGA-55-1596-01	TCGA-55-1596-01	55	M0	MALE	Lung Adenocarcinoma- Not Otherwise Specified (NOS)	8140/3	C34.1	NO	T2	NO	R0	Current smoker	Stage IIB	LIVING	45.1426	NA	NA	Non-Small Cell Lung Cancer	Lung Adenocarcinoma
TCGA-55-6543-01	TCGA-55-6543-01	60	[Not Available]	FEMALE	Lung Bronchioloalveolar Carcinoma Mucinous	8253/3	C34.1	NO	T1	NO	[Not Available]	Current reformed smoker for < or = 15 years	[Not Available]	LIVING	0.0657098	NA	NA	Non-Small Cell Lung Cancer	Lung Adenocarcinoma
TCGA-55-6642-01	TCGA-55-6642-01	63	MX	MALE	Lung Adenocarcinoma- Not Otherwise Specified (NOS)	8140/3	C34.3	NO	T2	NO	[Not Available]	Current smoker	Stage IB	LIVING	32.5921	NA	NA	Non-Small Cell Lung Cancer	Lung Adenocarcinoma
TCGA-55-6712-01	TCGA-55-6712-01	71	MX	MALE	Lung Adenocarcinoma- Not Otherwise Specified (NOS)	8140/3	C34.1	NO	T2a	NO	[Not Available]	Current reformed smoker for < or = 15 years	[Not Available]	LIVING	0.788518	NA	NA	Non-Small Cell Lung Cancer	Lung Adenocarcinoma
TCGA-55-6970-01	TCGA-55-6970-01	67	MX	FEMALE	Lung Papillary Adenocarcinoma	8260/3	C34.1	NO	T2	NO	[Not Available]	Current reformed smoker for < or = 15 years	Stage IIIA	DECEASED	15.2447	NA	NA	Non-Small Cell Lung Cancer	Lung Adenocarcinoma
TCGA-55-6971-01	TCGA-55-6971-01	59	MX	FEMALE	Lung Adenocarcinoma- Not Otherwise Specified (NOS)	8140/3	C34.3	NO	T2	NO	[Not Available]	Current reformed smoker for < or = 15 years	Stage IB	LIVING	0.919937	NA	NA	Non-Small Cell Lung Cancer	Lung Adenocarcinoma
TCGA-55-6972-01	TCGA-55-6972-01	72	M0	MALE	Lung Papillary Adenocarcinoma	8260/3	C34.1	NO	T2	NO	[Not Available]	Current smoker	Stage IB	LIVING	48.461	NA	NA	Non-Small Cell Lung Cancer	Lung Adenocarcinoma
TCGA-55-6978-01	TCGA-55-6978-01	81	MX	MALE	Lung Adenocarcinoma- Not Otherwise Specified (NOS)	8140/3	C34.2	NO	T2b	YES	[Not Available]	Lifelong Non-smoker	Stage IIA	DECEASED	5.45391	NA	NA	Non-Small Cell Lung Cancer	Lung Adenocarcinoma
TCGA-55-6979-01	TCGA-55-6979-01	59	M0	FEMALE	Lung Adenocarcinoma- Not Otherwise Specified (NOS)	8140/3	C34.1	NO	T2	YES	[Not Available]	Current reformed smoker for > 15 years	Stage IIB	DECEASED	7.75376	NA	NA	Non-Small Cell Lung Cancer	Lung Adenocarcinoma
TCGA-55-6980-01	TCGA-55-6980-01	56	M0	MALE	Lung Bronchioloalveolar Carcinoma Nonmucinous	8252/3	C34.3	NO	T1	NO	[Not Available]	Lifelong Non-smoker	Stage IA	LIVING	2.20128	NA	NA	Non-Small Cell Lung Cancer	Lung Adenocarcinoma
TCGA-55-6981-01	TCGA-55-6981-01	53	M0	FEMALE	Lung Adenocarcinoma- Not Otherwise Specified (NOS)	8140/3	C34.1	NO	T1	NO	[Not Available]	Current reformed smoker for > 15 years	Stage IIIA	DECEASED	45.3069	NA	NA	Non-Small Cell Lung Cancer	Lung Adenocarcinoma
TCGA-55-6982-01	TCGA-55-6982-01	79	M0	FEMALE	Lung Adenocarcinoma- Not Otherwise Specified (NOS)	8140/3	C34.3	NO	T2	NO	[Not Available]	Lifelong Non-smoker	Stage IIB	DECEASED	32.6906	NA	NA	Non-Small Cell Lung Cancer	Lung Adenocarcinoma
TCGA-55-6983-01	TCGA-55-6983-01	81	M0	MALE	Mucinous (Colloid) Adenocarcinoma	8480/3	C34.3	NO	T2	NO	[Not Available]	Current reformed smoker for < or = 15 years	Stage IIB	LIVING	59.993	NA	NA	Non-Small Cell Lung Cancer	Lung Adenocarcinoma
TCGA-55-6985-01	TCGA-55-6985-01	58	MX	FEMALE	Lung Adenocarcinoma- Not Otherwise Specified (NOS)	8140/3	C34.1	NO	T2	NO	[Not Available]	Current reformed smoker for < or = 15 years	Stage IB	LIVING	40.5101	NA	NA	Non-Small Cell Lung Cancer	Lung Adenocarcinoma
TCGA-55-6986-01	TCGA-55-6986-01	74	M0	FEMALE	Lung Bronchioloalveolar Carcinoma Nonmucinous	8252/3	C34.3	NO	T2	NO	[Not Available]	Lifelong Non-smoker	Stage IB	LIVING	70.9994	NA	NA	Non-Small Cell Lung Cancer	Lung Adenocarcinoma
TCGA-55-7281-01	TCGA-55-7281-01	70	[Not Available]	FEMALE	Lung Adenocarcinoma- Not Otherwise Specified (NOS)	8140/3	C34.2	NO	T1	NO	[Not Available]	Current reformed smoker for < or = 15 years	[Not Available]	LIVING	0.591388	NA	NA	Non-Small Cell Lung Cancer	Lung Adenocarcinoma
TCGA-55-7283-01	TCGA-55-7283-01	76	[Not Available]	FEMALE	Lung Bronchioloalveolar Carcinoma Nonmucinous	8252/3	C34.1	NO	T3	NO	[Not Available]	Current reformed smoker for > 15 years	[Not Available]	LIVING	1.11707	NA	NA	Non-Small Cell Lung Cancer	Lung Adenocarcinoma
TCGA-55-7573-01	TCGA-55-7573-01	72	MX	FEMALE	Lung Adenocarcinoma- Not Otherwise Specified (NOS)	8140/3	C34.1	NO	T1b	YES	[Not Available]	Current reformed smoker for > 15 years	Stage IA	LIVING	0.13142	NA	NA	Non-Small Cell Lung Cancer	Lung Adenocarcinoma
TCGA-55-7574-01	TCGA-55-7574-01	64	M0	FEMALE	Lung Adenocarcinoma- Not Otherwise Specified (NOS)	8140/3	C34.1	NO	T2a	NO	R1	Current reformed smoker for < or = 15 years	Stage IB	LIVING	3.12122	NA	NA	Non-Small Cell Lung Cancer	Lung Adenocarcinoma
TCGA-55-7576-01	TCGA-55-7576-01	54	M0	MALE	Lung Adenocarcinoma- Not Otherwise Specified (NOS)	8140/3	C34.1	NO	T2a	NO	R0	Current smoker	Stage IIA	LIVING	1.3142	NA	NA	Non-Small Cell Lung Cancer	Lung Adenocarcinoma
TCGA-55-7725-01	TCGA-55-7725-01	68	MX	FEMALE	Lung Adenocarcinoma- Not Otherwise Specified (NOS)	8140/3	C34.3	NO	T1a	YES	R0	Current reformed smoker for > 15 years	Stage IA	LIVING	1.28134	NA	NA	Non-Small Cell Lung Cancer	Lung Adenocarcinoma
TCGA-55-7727-01	TCGA-55-7727-01	71	MX	MALE	Lung Adenocarcinoma- Not Otherwise Specified (NOS)	8140/3	C34.1	NO	T1a	NO	R0	Current smoker	Stage IIIA	LIVING	1.0185	NA	NA	Non-Small Cell Lung Cancer	Lung Adenocarcinoma
TCGA-55-7728-01	TCGA-55-7728-01	64	MX	FEMALE	Mucinous (Colloid) Adenocarcinoma	8480/3	C34.1	NO	T2a	NO	R0	Current reformed smoker for < or = 15 years	Stage IB	LIVING	0.788518	NA	NA	Non-Small Cell Lung Cancer	Lung Adenocarcinoma
TCGA-55-7815-01	TCGA-55-7815-01	77	MX	MALE	Lung Adenocarcinoma- Not Otherwise Specified (NOS)	8140/3	C34.3	NO	T2a	NO	R0	Lifelong Non-smoker	Stage IB	LIVING	1.77416	NA	NA	Non-Small Cell Lung Cancer	Lung Adenocarcinoma
TCGA-55-7903-01	TCGA-55-7903-01	64	MX	MALE	Lung Adenocarcinoma- Not Otherwise Specified (NOS)	8140/3	C34.3	NO	T1b	NO	R0	Current smoker	Stage IA	LIVING	0.624243	NA	NA	Non-Small Cell Lung Cancer	Lung Adenocarcinoma
TCGA-55-7907-01	TCGA-55-7907-01	77	MX	MALE	Lung Adenocarcinoma- Not Otherwise Specified (NOS)	8140/3	C34.1	NO	T2a	NO	R0	Current reformed smoker for > 15 years	Stage IIA	LIVING	0.525678	NA	NA	Non-Small Cell Lung Cancer	Lung Adenocarcinoma
TCGA-55-7911-01	TCGA-55-7911-01	70	MX	FEMALE	Lung Adenocarcinoma- Not Otherwise Specified (NOS)	8140/3	C34.2	NO	T1a	NO	R0	Current reformed smoker for > 15 years	Stage IA	LIVING	0.689953	NA	NA	Non-Small Cell Lung Cancer	Lung Adenocarcinoma
TCGA-55-7914-01	TCGA-55-7914-01	71	MX	FEMALE	Lung Adenocarcinoma- Not Otherwise Specified (NOS)	8140/3	C34.1	NO	T1b	YES	R0	Current smoker	Stage IIA	LIVING	0.0985647	NA	NA	Non-Small Cell Lung Cancer	Lung Adenocarcinoma
TCGA-64-1676-01	TCGA-64-1676-01	58	M0	MALE	Lung Adenocarcinoma- Not Otherwise Specified (NOS)	8140/3	C34.3	NO	T1a	NO	R0	Current smoker	Stage IA	LIVING	56.7733	NA	NA	Non-Small Cell Lung Cancer	Lung Adenocarcinoma
TCGA-64-1677-01	TCGA-64-1677-01	77	M0	FEMALE	Lung Adenocarcinoma- Not Otherwise Specified (NOS)	8140/3	C34.1	NO	T2	YES	R0	Current smoker	Stage IIIA	DECEASED	20.6329	NA	NA	Non-Small Cell Lung Cancer	Lung Adenocarcinoma
TCGA-64-1678-01	TCGA-64-1678-01	70	M0	FEMALE	Lung Adenocarcinoma- Not Otherwise Specified (NOS)	8140/3	C34.1	NO	T2b	NO	R0	Current reformed smoker for > 15 years	Stage IIA	LIVING	39.0645	NA	NA	Non-Small Cell Lung Cancer	Lung Adenocarcinoma
TCGA-64-1679-01	TCGA-64-1679-01	58	M0	FEMALE	Lung Adenocarcinoma- Not Otherwise Specified (NOS)	8140/3	C34.1	NO	T1	NO	R0	Current smoker	Stage IIIA	LIVING	55.3605	NA	NA	Non-Small Cell Lung Cancer	Lung Adenocarcinoma
TCGA-64-1680-01	TCGA-64-1680-01	63	M1	MALE	Lung Adenocarcinoma Mixed Subtype	8140/3	C34.8	NO	T2a	NO	R0	Current reformed smoker for > 15 years	Stage IV	LIVING	36.9946	NA	NA	Non-Small Cell Lung Cancer	Lung Adenocarcinoma
TCGA-64-1681-01	TCGA-64-1681-01	61	M0	FEMALE	Lung Adenocarcinoma- Not Otherwise Specified (NOS)	8140/3	C34.9	NO	T1	NO	R0	Current reformed smoker for > 15 years	Stage IA	DECEASED	44.3541	NA	NA	Non-Small Cell Lung Cancer	Lung Adenocarcinoma
TCGA-64-5774-01	TCGA-64-5774-01	60	M0	MALE	Lung Adenocarcinoma- Not Otherwise Specified (NOS)	8140/3	C34.0	NO	T2	NO	R0	Current reformed smoker for < or = 15 years	Stage IB	LIVING	83.78	NA	NA	Non-Small Cell Lung Cancer	Lung Adenocarcinoma
TCGA-64-5775-01	TCGA-64-5775-01	71	M0	MALE	Lung Adenocarcinoma- Not Otherwise Specified (NOS)	8140/3	C34.1	YES	T4	NO	R0	Current smoker	Stage IIIA	DECEASED	0.0985647	NA	NA	Non-Small Cell Lung Cancer	Lung Adenocarcinoma
TCGA-64-5778-01	TCGA-64-5778-01	60	M0	MALE	Lung Bronchioloalveolar Carcinoma Nonmucinous	8252/3	C34.1	NO	T2	NO	R0	Current reformed smoker for < or = 15 years	Stage IB	LIVING	30.4236	NA	NA	Non-Small Cell Lung Cancer	Lung Adenocarcinoma
TCGA-64-5781-01	TCGA-64-5781-01	55	M0	FEMALE	Lung Adenocarcinoma Mixed Subtype	8255/3	C34.1	NO	T2	NO	R0	Current reformed smoker for < or = 15 years	Stage IB	LIVING	39.4916	NA	NA	Non-Small Cell Lung Cancer	Lung Adenocarcinoma
TCGA-67-3771-01	TCGA-67-3771-01	77	M0	FEMALE	Lung Adenocarcinoma- Not Otherwise Specified (NOS)	8140/3	C34.1	NO	T1	NO	R0	Current reformed smoker for < or = 15 years	Stage IA	LIVING	1.97129	NA	NA	Non-Small Cell Lung Cancer	Lung Adenocarcinoma
TCGA-67-3772-01	TCGA-67-3772-01	82	M0	FEMALE	Lung Adenocarcinoma- Not Otherwise Specified (NOS)	8140/3	C34.1	NO	T2	NO	[Not Available]	Lifelong Non-smoker	Stage IB	LIVING	0.591388	NA	NA	Non-Small Cell Lung Cancer	Lung Adenocarcinoma
TCGA-67-3773-01	TCGA-67-3773-01	84	M0	FEMALE	Lung Adenocarcinoma- Not Otherwise Specified (NOS)	8140/3	C34.3	NO	T2	NO	R0	Current reformed smoker for > 15 years	Stage IB	LIVING	2.037	NA	NA	Non-Small Cell Lung Cancer	Lung Adenocarcinoma
TCGA-67-3774-01	TCGA-67-3774-01	73	M0	FEMALE	Lung Adenocarcinoma- Not Otherwise Specified (NOS)	8140/3	C34.3	NO	T2	NO	[Not Available]	Current reformed smoker for > 15 years	Stage IB	LIVING	0.591388	NA	NA	Non-Small Cell Lung Cancer	Lung Adenocarcinoma
TCGA-67-6215-01	TCGA-67-6215-01	52	M0	FEMALE	Lung Adenocarcinoma- Not Otherwise Specified (NOS)	8140/3	C34.3	NO	T2a	NO	R0	Lifelong Non-smoker	Stage IB	LIVING	0.887082	NA	NA	Non-Small Cell Lung Cancer	Lung Adenocarcinoma
TCGA-67-6216-01	TCGA-67-6216-01	57	M0	FEMALE	Lung Adenocarcinoma- Not Otherwise Specified (NOS)	8140/3	C34.2	NO	T1a	NO	R0	Lifelong Non-smoker	Stage IA	LIVING	0.689953	NA	NA	Non-Small Cell Lung Cancer	Lung Adenocarcinoma
TCGA-67-6217-01	TCGA-67-6217-01	73	M0	FEMALE	Lung Adenocarcinoma- Not Otherwise Specified (NOS)	8140/3	C34.1	NO	T2a	YES	R0	Current reformed smoker for > 15 years	Stage IIB	LIVING	13.8648	NA	NA	Non-Small Cell Lung Cancer	Lung Adenocarcinoma
TCGA-69-7760-01	TCGA-69-7760-01	73	M0	MALE	Lung Acinar Adenocarcinoma	8255/3	C34.3	NO	T3	NO	[Not Available]	Lifelong Non-smoker	Stage IIB	LIVING	5.05965	NA	NA	Non-Small Cell Lung Cancer	Lung Adenocarcinoma
TCGA-69-7761-01	TCGA-69-7761-01	84	MX	MALE	Lung Acinar Adenocarcinoma	8550/3	C34.3	NO	T2a	NO	[Not Available]	Current reformed smoker for > 15 years	Stage IB	LIVING	6.11101	NA	NA	Non-Small Cell Lung Cancer	Lung Adenocarcinoma
TCGA-69-7763-01	TCGA-69-7763-01	69	M0	MALE	Lung Adenocarcinoma Mixed Subtype	8550/3	C34.2	NO	T1b	NO	[Not Available]	Current reformed smoker for < or = 15 years	Stage IA	LIVING	22.6699	NA	NA	Non-Small Cell Lung Cancer	Lung Adenocarcinoma
TCGA-69-7764-01	TCGA-69-7764-01	75	M0	MALE	Lung Adenocarcinoma Mixed Subtype	8550/3	C34.1	NO	T1b	NO	[Not Available]	Current reformed smoker for > 15 years	Stage IA	LIVING	13.6019	NA	NA	Non-Small Cell Lung Cancer	Lung Adenocarcinoma
TCGA-69-7765-01	TCGA-69-7765-01	56	MX	MALE	Lung Adenocarcinoma Mixed Subtype	8255/3	C34.1	NO	T4	NO	[Not Available]	Current reformed smoker for < or = 15 years	Stage IV	LIVING	4.23828	NA	NA	Non-Small Cell Lung Cancer	Lung Adenocarcinoma
TCGA-71-6725-01	TCGA-71-6725-01	48	M0	FEMALE	Lung Papillary Adenocarcinoma	8260/3	C34.1	NO	T1	NO	RX	Current smoker	Stage IA	LIVING	2.00415	NA	NA	Non-Small Cell Lung Cancer	Lung Adenocarcinoma
TCGA-73-4658-01	TCGA-73-4658-01	80	M0	FEMALE	Lung Adenocarcinoma- Not Otherwise Specified (NOS)	8140/3	C34.3	NO	T2	YES	R0	Current reformed smoker for > 15 years	Stage IB	DECEASED	52.535	NA	NA	Non-Small Cell Lung Cancer	Lung Adenocarcinoma
TCGA-73-4659-01	TCGA-73-4659-01	66	M0	MALE	Lung Adenocarcinoma- Not Otherwise Specified (NOS)	8140/3	C34.9	NO	T2	NO	R0	Current reformed smoker for > 15 years	Stage IIIA	DECEASED	23.3598	NA	NA	Non-Small Cell Lung Cancer	Lung Adenocarcinoma
TCGA-73-4662-01	TCGA-73-4662-01	65	M0	FEMALE	Lung Adenocarcinoma- Not Otherwise Specified (NOS)	8140/3	C34.1	NO	T1	NO	R0	Current reformed smoker for > 15 years	Stage IA	LIVING	29.9308	NA	NA	Non-Small Cell Lung Cancer	Lung Adenocarcinoma
TCGA-73-4675-01	TCGA-73-4675-01	59	M0	MALE	Lung Adenocarcinoma- Not Otherwise Specified (NOS)	8140/3	C34.3	NO	T3	NO	RX	Current reformed smoker for < or = 15 years	Stage IIIA	LIVING	1.3142	NA	NA	Non-Small Cell Lung Cancer	Lung Adenocarcinoma
TCGA-73-4676-01	TCGA-73-4676-01	45	M0	MALE	Lung Adenocarcinoma- Not Otherwise Specified (NOS)	8140/3	C34.1	YES	T2a	NO	R0	Current reformed smoker for < or = 15 years	Stage IIA	LIVING	4.0083	NA	NA	Non-Small Cell Lung Cancer	Lung Adenocarcinoma
TCGA-75-5122-01	TCGA-75-5122-01	[Not Available]	M0	MALE	Lung Adenocarcinoma- Not Otherwise Specified (NOS)	8140/3	C34.1	NO	T2	NO	R0	Current reformed smoker for > 15 years	Stage IB	DECEASED	NA	NA	NA	Non-Small Cell Lung Cancer	Lung Adenocarcinoma
TCGA-75-5126-01	TCGA-75-5126-01	[Not Available]	M0	FEMALE	Lung Papillary Adenocarcinoma	8260/3	C34.1	NO	T3	NO	R2	Current reformed smoker for < or = 15 years	Stage IIIA	LIVING	NA	NA	NA	Non-Small Cell Lung Cancer	Lung Adenocarcinoma
TCGA-75-5146-01	TCGA-75-5146-01	[Not Available]	M0	MALE	Lung Adenocarcinoma- Not Otherwise Specified (NOS)	8252/3	C34.3	NO	T2	NO	R0	Current reformed smoker for > 15 years	Stage IB	LIVING	NA	NA	NA	Non-Small Cell Lung Cancer	Lung Adenocarcinoma
TCGA-75-5147-01	TCGA-75-5147-01	[Not Available]	M0	FEMALE	Lung Adenocarcinoma- Not Otherwise Specified (NOS)	8252/3	C34.1	NO	T2	NO	R0	Lifelong Non-smoker	Stage IB	LIVING	NA	NA	NA	Non-Small Cell Lung Cancer	Lung Adenocarcinoma
TCGA-75-6203-01	TCGA-75-6203-01	[Not Available]	M0	FEMALE	Lung Adenocarcinoma- Not Otherwise Specified (NOS)	8140/3	C34.3	NO	T2	NO	R0	Lifelong Non-smoker	Stage IIIA	LIVING	NA	NA	NA	Non-Small Cell Lung Cancer	Lung Adenocarcinoma
TCGA-75-6205-01	TCGA-75-6205-01	[Not Available]	M0	FEMALE	Lung Adenocarcinoma- Not Otherwise Specified (NOS)	8140/3	C34.1	NO	T2a	NO	R0	Lifelong Non-smoker	Stage IB	DECEASED	NA	NA	NA	Non-Small Cell Lung Cancer	Lung Adenocarcinoma
TCGA-75-6207-01	TCGA-75-6207-01	[Not Available]	M0	MALE	Lung Adenocarcinoma- Not Otherwise Specified (NOS)	8140/3	C34.9	NO	T2	NO	R0	Current reformed smoker for > 15 years	Stage IIIA	DECEASED	NA	NA	NA	Non-Small Cell Lung Cancer	Lung Adenocarcinoma
TCGA-75-6211-01	TCGA-75-6211-01	[Not Available]	M0	FEMALE	Lung Adenocarcinoma- Not Otherwise Specified (NOS)	8140/3	C34.9	NO	T2	NO	R0	Current smoker	Stage IB	DECEASED	NA	NA	NA	Non-Small Cell Lung Cancer	Lung Adenocarcinoma
TCGA-75-6212-01	TCGA-75-6212-01	[Not Available]	M0	FEMALE	Lung Micropapillary Adenocarcinoma	8507/3	C34.3	NO	T2	NO	R0	Lifelong Non-smoker	Stage IIA	LIVING	NA	NA	NA	Non-Small Cell Lung Cancer	Lung Adenocarcinoma
TCGA-75-6214-01	TCGA-75-6214-01	[Not Available]	M0	FEMALE	Lung Adenocarcinoma- Not Otherwise Specified (NOS)	8140/3	C34.1	NO	T2	NO	R0	Current smoker	Stage IIIA	LIVING	NA	NA	NA	Non-Small Cell Lung Cancer	Lung Adenocarcinoma
TCGA-75-7025-01	TCGA-75-7025-01	[Not Available]	M0	MALE	Lung Adenocarcinoma- Not Otherwise Specified (NOS)	8140/3	C34.1	NO	T2	NO	R0	Current reformed smoker for > 15 years	Stage IB	LIVING	NA	NA	NA	Non-Small Cell Lung Cancer	Lung Adenocarcinoma
TCGA-75-7027-01	TCGA-75-7027-01	[Not Available]	M0	MALE	Lung Adenocarcinoma- Not Otherwise Specified (NOS)	8140/3	C34.3	NO	T2	NO	R0	Current smoker	Stage IB	LIVING	NA	NA	NA	Non-Small Cell Lung Cancer	Lung Adenocarcinoma
TCGA-75-7030-01	TCGA-75-7030-01	[Not Available]	M0	MALE	Lung Adenocarcinoma- Not Otherwise Specified (NOS)	8140/3	C34.9	NO	T3	NO	R0	Lifelong Non-smoker	Stage IIB	LIVING	NA	NA	NA	Non-Small Cell Lung Cancer	Lung Adenocarcinoma
TCGA-75-7031-01	TCGA-75-7031-01	[Not Available]	M0	FEMALE	Lung Adenocarcinoma- Not Otherwise Specified (NOS)	8140/3	C34.1	NO	T2	NO	R0	Current reformed smoker for > 15 years	Stage IB	LIVING	NA	NA	NA	Non-Small Cell Lung Cancer	Lung Adenocarcinoma
TCGA-78-7143-01	TCGA-78-7143-01	62	M0	FEMALE	Lung Bronchioloalveolar Carcinoma Nonmucinous	8252/3	C34.1	NO	T2	NO	R0	Lifelong Non-smoker	Stage IB	DECEASED	162.993	NA	NA	Non-Small Cell Lung Cancer	Lung Adenocarcinoma
TCGA-78-7145-01	TCGA-78-7145-01	52	M1	FEMALE	Lung Adenocarcinoma- Not Otherwise Specified (NOS)	8140/3	C34.2	NO	T4	NO	R1	Current reformed smoker for < or = 15 years	Stage IV	DECEASED	27.1381	NA	NA	Non-Small Cell Lung Cancer	Lung Adenocarcinoma
TCGA-78-7147-01	TCGA-78-7147-01	67	M0	FEMALE	Lung Adenocarcinoma- Not Otherwise Specified (NOS)	8140/3	C34.1	NO	T2	NO	R0	Current smoker	Stage IIB	DECEASED	19.253	NA	NA	Non-Small Cell Lung Cancer	Lung Adenocarcinoma
TCGA-78-7148-01	TCGA-78-7148-01	71	M0	MALE	Lung Adenocarcinoma Mixed Subtype	8255/3	C34.1	NO	T2	NO	R0	Current smoker	Stage IIB	DECEASED	20.5672	NA	NA	Non-Small Cell Lung Cancer	Lung Adenocarcinoma
TCGA-78-7149-01	TCGA-78-7149-01	71	M0	MALE	Lung Adenocarcinoma Mixed Subtype	8255/3	C34.3	NO	T4	NO	R0	Current smoker	Stage IIIB	LIVING	35.9104	NA	NA	Non-Small Cell Lung Cancer	Lung Adenocarcinoma
TCGA-78-7150-01	TCGA-78-7150-01	59	M0	MALE	Lung Adenocarcinoma- Not Otherwise Specified (NOS)	8140/3	C34.3	NO	T2	NO	R0	Current reformed smoker for < or = 15 years	Stage IIB	DECEASED	21.8485	NA	NA	Non-Small Cell Lung Cancer	Lung Adenocarcinoma
TCGA-78-7152-01	TCGA-78-7152-01	65	M0	MALE	Lung Adenocarcinoma Mixed Subtype	8255/3	C34.1	NO	T2	NO	R0	Current reformed smoker for < or = 15 years	Stage IB	LIVING	39.4587	NA	NA	Non-Small Cell Lung Cancer	Lung Adenocarcinoma
TCGA-78-7153-01	TCGA-78-7153-01	65	M0	FEMALE	Lung Adenocarcinoma Mixed Subtype	8255/3	C34.8	NO	T2	NO	R0	Current reformed smoker for < or = 15 years	Stage IB	LIVING	24.9697	NA	NA	Non-Small Cell Lung Cancer	Lung Adenocarcinoma
TCGA-78-7154-01	TCGA-78-7154-01	72	M0	MALE	Lung Adenocarcinoma- Not Otherwise Specified (NOS)	8140/3	C34.1	NO	T3	NO	R0	Current reformed smoker for < or = 15 years	Stage IIIA	DECEASED	19.483	NA	NA	Non-Small Cell Lung Cancer	Lung Adenocarcinoma
TCGA-78-7155-01	TCGA-78-7155-01	68	M0	MALE	Lung Adenocarcinoma- Not Otherwise Specified (NOS)	8140/3	C34.1	NO	T2	NO	R0	Current reformed smoker for < or = 15 years	Stage IB	DECEASED	38.4731	NA	NA	Non-Small Cell Lung Cancer	Lung Adenocarcinoma
TCGA-78-7156-01	TCGA-78-7156-01	62	M1	MALE	Lung Adenocarcinoma Mixed Subtype	8255/3	C34.9	NO	T4	NO	R0	Current reformed smoker for > 15 years	Stage IV	DECEASED	32.0664	NA	NA	Non-Small Cell Lung Cancer	Lung Adenocarcinoma
TCGA-78-7158-01	TCGA-78-7158-01	59	M0	FEMALE	Lung Adenocarcinoma Mixed Subtype	8255/3	C34.3	NO	T4	NO	R1	Current reformed smoker for < or = 15 years	Stage IIIB	DECEASED	5.88103	NA	NA	Non-Small Cell Lung Cancer	Lung Adenocarcinoma
TCGA-78-7159-01	TCGA-78-7159-01	60	M0	FEMALE	Lung Adenocarcinoma Mixed Subtype	8255/3	C34.1	NO	T1	NO	R0	Current reformed smoker for < or = 15 years	Stage IA	LIVING	40.083	NA	NA	Non-Small Cell Lung Cancer	Lung Adenocarcinoma
TCGA-78-7160-01	TCGA-78-7160-01	61	M1	MALE	Lung Adenocarcinoma Mixed Subtype	8255/3	C34.3	NO	T4	NO	R0	Current reformed smoker for < or = 15 years	Stage IV	LIVING	22.2756	NA	NA	Non-Small Cell Lung Cancer	Lung Adenocarcinoma
TCGA-78-7161-01	TCGA-78-7161-01	69	M0	FEMALE	Lung Adenocarcinoma Mixed Subtype	8255/3	C34.1	NO	T3	NO	R1	Current reformed smoker for < or = 15 years	Stage IIB	LIVING	7.03095	NA	NA	Non-Small Cell Lung Cancer	Lung Adenocarcinoma
TCGA-78-7162-01	TCGA-78-7162-01	75	M0	MALE	Lung Adenocarcinoma Mixed Subtype	8255/3	C34.1	NO	T1	NO	R0	Current smoker	Stage IA	DECEASED	104.084	NA	NA	Non-Small Cell Lung Cancer	Lung Adenocarcinoma
TCGA-78-7163-01	TCGA-78-7163-01	60	M0	MALE	Lung Adenocarcinoma- Not Otherwise Specified (NOS)	8140/3	C34.3	NO	T2	NO	R0	Current reformed smoker for < or = 15 years	Stage IB	LIVING	223.808	NA	NA	Non-Small Cell Lung Cancer	Lung Adenocarcinoma
TCGA-78-7166-01	TCGA-78-7166-01	84	M0	MALE	Lung Adenocarcinoma- Not Otherwise Specified (NOS)	8140/3	C34.3	NO	T2	YES	R0	Current reformed smoker for > 15 years	Stage IIB	DECEASED	8.47656	NA	NA	Non-Small Cell Lung Cancer	Lung Adenocarcinoma
TCGA-78-7167-01	TCGA-78-7167-01	77	M1	MALE	Lung Papillary Adenocarcinoma	8260/3	C34.9	NO	T2	NO	R0	Current smoker	Stage IV	DECEASED	88.0511	NA	NA	Non-Small Cell Lung Cancer	Lung Adenocarcinoma
TCGA-78-7535-01	TCGA-78-7535-01	45	M0	MALE	Lung Adenocarcinoma- Not Otherwise Specified (NOS)	8140/3	C34.1	NO	T2	NO	R0	Current smoker	Stage IB	DECEASED	31.1793	NA	NA	Non-Small Cell Lung Cancer	Lung Adenocarcinoma
TCGA-78-7536-01	TCGA-78-7536-01	69	M0	MALE	Lung Adenocarcinoma- Not Otherwise Specified (NOS)	8140/3	C34.1	NO	T2	NO	R0	Current reformed smoker for < or = 15 years	Stage IIIA	DECEASED	8.0166	NA	NA	Non-Small Cell Lung Cancer	Lung Adenocarcinoma
TCGA-78-7537-01	TCGA-78-7537-01	72	M0	MALE	Lung Adenocarcinoma Mixed Subtype	8255/3	C34.1	NO	T2	NO	R0	Current reformed smoker for > 15 years	Stage IB	DECEASED	53.2906	NA	NA	Non-Small Cell Lung Cancer	Lung Adenocarcinoma
TCGA-78-7539-01	TCGA-78-7539-01	75	M0	FEMALE	Lung Adenocarcinoma Mixed Subtype	8255/3	C34.1	NO	T2b	NO	R0	Current reformed smoker for > 15 years	Stage IIA	LIVING	10.7436	NA	NA	Non-Small Cell Lung Cancer	Lung Adenocarcinoma
TCGA-78-7540-01	TCGA-78-7540-01	66	M0	FEMALE	Lung Bronchioloalveolar Carcinoma Mucinous	8253/3	C34.3	NO	T2	NO	R0	Lifelong Non-smoker	Stage IB	LIVING	28.9452	NA	NA	Non-Small Cell Lung Cancer	Lung Adenocarcinoma
TCGA-78-7542-01	TCGA-78-7542-01	56	M0	MALE	Lung Adenocarcinoma- Not Otherwise Specified (NOS)	8140/3	C34.1	NO	T2	NO	R0	Current smoker	Stage IB	DECEASED	10.5464	NA	NA	Non-Small Cell Lung Cancer	Lung Adenocarcinoma
TCGA-78-7633-01	TCGA-78-7633-01	67	M0	MALE	Lung Adenocarcinoma Mixed Subtype	8255/3	C34.1	NO	T2	YES	R0	Current reformed smoker for < or = 15 years	Stage IA	LIVING	32.6578	NA	NA	Non-Small Cell Lung Cancer	Lung Adenocarcinoma
TCGA-80-5607-01	TCGA-80-5607-01	[Not Available]	M0	FEMALE	Lung Adenocarcinoma- Not Otherwise Specified (NOS)	8260/3	C34.1	NO	T2	NO	R0	Current reformed smoker for > 15 years	Stage IIB	LIVING	NA	NA	NA	Non-Small Cell Lung Cancer	Lung Adenocarcinoma
TCGA-80-5608-01	TCGA-80-5608-01	[Not Available]	M0	FEMALE	Lung Adenocarcinoma- Not Otherwise Specified (NOS)	8260/3	C34.1	NO	T1	NO	R0	Current smoker	Stage IA	LIVING	NA	NA	NA	Non-Small Cell Lung Cancer	Lung Adenocarcinoma
TCGA-86-6562-01	TCGA-86-6562-01	52	M0	MALE	Lung Adenocarcinoma- Not Otherwise Specified (NOS)	8140/3	C34.1	NO	T2a	NO	R0	Lifelong Non-smoker	Stage IIA	LIVING	0	NA	NA	Non-Small Cell Lung Cancer	Lung Adenocarcinoma
TCGA-86-6851-01	TCGA-86-6851-01	73	MX	FEMALE	Lung Adenocarcinoma Mixed Subtype	8255/3	C34.1	NO	T1b	NO	[Not Available]	Current smoker	Stage IIA	LIVING	0	NA	NA	Non-Small Cell Lung Cancer	Lung Adenocarcinoma
TCGA-86-7713-01	TCGA-86-7713-01	70	M0	MALE	Lung Adenocarcinoma- Not Otherwise Specified (NOS)	8140/3	C34.2	NO	T2	NO	R0	Lifelong Non-smoker	Stage IB	LIVING	0.229984	NA	NA	Non-Small Cell Lung Cancer	Lung Adenocarcinoma
TCGA-86-7714-01	TCGA-86-7714-01	61	M0	FEMALE	Lung Adenocarcinoma Mixed Subtype	8255/3	C34.3	NO	T2	NO	[Not Available]	Current smoker	Stage IIIA	LIVING	0	NA	NA	Non-Small Cell Lung Cancer	Lung Adenocarcinoma
TCGA-91-6828-01	TCGA-91-6828-01	70	MX	MALE	Lung Adenocarcinoma- Not Otherwise Specified (NOS)	8140/3	C34.3	NO	T1a	NO	[Not Available]	Current reformed smoker for > 15 years	Stage IA	LIVING	1.21563	NA	NA	Non-Small Cell Lung Cancer	Lung Adenocarcinoma
TCGA-91-6829-01	TCGA-91-6829-01	78	MX	MALE	Lung Bronchioloalveolar Carcinoma Nonmucinous	8252/3	C34.3	NO	T2	NO	[Not Available]	Current reformed smoker for < or = 15 years	Stage IB	DECEASED	41.2986	NA	NA	Non-Small Cell Lung Cancer	Lung Adenocarcinoma
TCGA-91-6835-01	TCGA-91-6835-01	81	MX	FEMALE	Lung Adenocarcinoma- Not Otherwise Specified (NOS)	8140/3	C34.3	NO	T1	NO	[Not Available]	Current reformed smoker for > 15 years	Stage IA	LIVING	1.14992	NA	NA	Non-Small Cell Lung Cancer	Lung Adenocarcinoma
TCGA-91-6840-01	TCGA-91-6840-01	59	MX	FEMALE	Lung Adenocarcinoma- Not Otherwise Specified (NOS)	8140/3	C34.1	NO	T1b	NO	[Not Available]	Current reformed smoker for > 15 years	Stage IA	LIVING	0	NA	NA	Non-Small Cell Lung Cancer	Lung Adenocarcinoma
TCGA-91-6847-01	TCGA-91-6847-01	62	MX	FEMALE	Lung Adenocarcinoma- Not Otherwise Specified (NOS)	8140/3	C34.3	NO	T2	NO	[Not Available]	Current reformed smoker for > 15 years	Stage IB	LIVING	26.9082	NA	NA	Non-Small Cell Lung Cancer	Lung Adenocarcinoma
TCGA-91-6849-01	TCGA-91-6849-01	75	MX	FEMALE	Lung Adenocarcinoma- Not Otherwise Specified (NOS)	8140/3	C34.1	NO	T2	NO	[Not Available]	Current reformed smoker for > 15 years	Stage IIIA	LIVING	0.919937	NA	NA	Non-Small Cell Lung Cancer	Lung Adenocarcinoma
TCGA-91-7771-01	TCGA-91-7771-01	62	MX	MALE	Lung Adenocarcinoma- Not Otherwise Specified (NOS)	8140/3	C34.1	NO	T3	YES	[Not Available]	Current reformed smoker for < or = 15 years	Stage IIB	LIVING	1.0185	NA	NA	Non-Small Cell Lung Cancer	Lung Adenocarcinoma
TCGA-93-7347-01	TCGA-93-7347-01	76	MX	FEMALE	Lung Adenocarcinoma Mixed Subtype	[Not Available]	[Not Available]	NO	T1a	NO	R0	Current reformed smoker for > 15 years	Stage IA	LIVING	9.75791	NA	NA	Non-Small Cell Lung Cancer	Lung Adenocarcinoma
TCGA-93-7348-01	TCGA-93-7348-01	75	MX	FEMALE	Lung Adenocarcinoma- Not Otherwise Specified (NOS)	8140/3	C34.1	NO	T1a	NO	R0	Current reformed smoker for < or = 15 years	Stage IA	LIVING	4.17257	NA	NA	Non-Small Cell Lung Cancer	Lung Adenocarcinoma
TCGA-95-7039-01	TCGA-95-7039-01	54	MX	FEMALE	Lung Adenocarcinoma Mixed Subtype	8255/3	C34.1	NO	T3	NO	[Not Available]	Current smoker	Stage IIA	LIVING	1.11707	NA	NA	Non-Small Cell Lung Cancer	Lung Adenocarcinoma
TCGA-95-7043-01	TCGA-95-7043-01	63	MX	FEMALE	Lung Adenocarcinoma Mixed Subtype	8255/3	C34.1	NO	T1a	YES	[Not Available]	Current reformed smoker for > 15 years	Stage IA	LIVING	0.0657098	NA	NA	Non-Small Cell Lung Cancer	Lung Adenocarcinoma
TCGA-95-7567-01	TCGA-95-7567-01	61	M0	MALE	Lung Adenocarcinoma Mixed Subtype	8255/3	C34.1	NO	T2b	NO	[Not Available]	Current reformed smoker for < or = 15 years	Stage IB	LIVING	5.35535	NA	NA	Non-Small Cell Lung Cancer	Lung Adenocarcinoma
TCGA-97-7546-01	TCGA-97-7546-01	76	MX	FEMALE	Lung Acinar Adenocarcinoma	8550/3	C34.1	NO	T1	NO	[Not Available]	Current reformed smoker for > 15 years	Stage IA	LIVING	31.6393	NA	NA	Non-Small Cell Lung Cancer	Lung Adenocarcinoma
TCGA-97-7552-01	TCGA-97-7552-01	70	MX	MALE	Lung Bronchioloalveolar Carcinoma Mucinous	8253/3	C34.3	NO	T2	NO	[Not Available]	Current reformed smoker for > 15 years	Stage IB	LIVING	48.4938	NA	NA	Non-Small Cell Lung Cancer	Lung Adenocarcinoma
TCGA-97-7553-01	TCGA-97-7553-01	58	MX	FEMALE	Lung Bronchioloalveolar Carcinoma Nonmucinous	8252/3	C34.3	NO	T1	NO	[Not Available]	Current smoker	Stage IA	LIVING	43.7299	NA	NA	Non-Small Cell Lung Cancer	Lung Adenocarcinoma
TCGA-97-7554-01	TCGA-97-7554-01	83	M0	FEMALE	Lung Papillary Adenocarcinoma	8260/3	C34.3	NO	T2a	NO	[Not Available]	Current reformed smoker for > 15 years	Stage IIIA	LIVING	8.64084	NA	NA	Non-Small Cell Lung Cancer	Lung Adenocarcinoma
TCGA-97-7937-01	TCGA-97-7937-01	65	MX	MALE	Lung Micropapillary Adenocarcinoma	8507/3	C34.1	NO	T2a	NO	[Not Available]	Current reformed smoker for > 15 years	Stage IB	LIVING	5.94674	NA	NA	Non-Small Cell Lung Cancer	Lung Adenocarcinoma
TCGA-97-7938-01	TCGA-97-7938-01	76	MX	FEMALE	Lung Bronchioloalveolar Carcinoma Nonmucinous	8252/3	C34.1	NO	T1a	NO	[Not Available]	Current reformed smoker for > 15 years	Stage IA	DECEASED	0.591388	NA	NA	Non-Small Cell Lung Cancer	Lung Adenocarcinoma
TCGA-97-7941-01	TCGA-97-7941-01	72	MX	FEMALE	Lung Acinar Adenocarcinoma	8550/3	C34.1	NO	T1b	NO	[Not Available]	Current reformed smoker for > 15 years	Stage IA	LIVING	0.722808	NA	NA	Non-Small Cell Lung Cancer	Lung Adenocarcinoma
TCGA-99-7458-01	TCGA-99-7458-01	74	M0	FEMALE	Lung Bronchioloalveolar Carcinoma Nonmucinous	8252/3	C34.3	NO	T4	NO	R0	Current reformed smoker for < or = 15 years	Stage IIIA	LIVING	8.21373	NA	NA	Non-Small Cell Lung Cancer	Lung Adenocarcinoma
